# Supplementary material for: A Nucleotide Metabolism-Related Gene Signature for Risk Stratification and Prognosis Prediction in Hepatocellular Carcinoma Based on an Integrated Transcriptomics and Metabolomics Approach
Source: Metabolites. 2023 Oct 30;13(11):1116. doi: 10.3390/metabo13111116 (PMC10673507; doi:10.3390/metabo13111116)
Supplement: Supplementary file 1 [file metabolites-13-01116-s001.zip]

Archive with 15 entries (15 files):
- Supplementary Figure 1 Frequency of single nucleotide variations (SNVs) and various NMRG variant categories..tif
- Supplementary Figure 2 Identifying NMRG-related prognostic DEGs in the TCGA dataset..tif
- Supplementary Figure 3 Rank survey of NMF clustering..tif
- Supplementary Figure 4 Heatmap to demonstrate mRNA levels of NMRGs in two clusters..tif
- Supplementary Figure 5 The link between drug sensitivity and the NMRG clusters..tif
- Supplementary Figure 6 Variable selection..tif
- Supplementary Figure 7 Internal validation of NMRG-related signature in the test cohort..tif
- Supplementary Figure 8 Relationship between NMRG-related signature and immune function..tif
- Supplementary Figure 9 Supplement to the expression of nucleotide metabolism- related metabolites in patients with hepatocellular carcinoma..tif
- Supplementary Method.pdf
- Supplementary Table 1 Gene primer sequence.xls
- Supplementary Table 2 The findings of DEGs between 373 HCC samples and 49 normal samples from the TCGA..xls
- Supplementary Table 3 The findings of HCC samples from the TCGA database that underwent univariate Cox regression analysis..xls
- Supplementary Table 4 The results of DEGs between two NMRGs clusters..xls
- Supplementary Table 5  Baseline data of clinical samples..xls
