# Supplementary material for: A Nucleotide Metabolism-Related Gene Signature for Risk Stratification and Prognosis Prediction in Hepatocellular Carcinoma Based on an Integrated Transcriptomics and Metabolomics Approach
Source: Metabolites. 2023 Oct 30;13(11):1116. doi: 10.3390/metabo13111116 (PMC10673507; doi:10.3390/metabo13111116)
Supplement: Supplementary file 1 [file metabolites-13-01116-s001.zip › Supplementary Table 1 Gene primer sequence.xls]

## Sheet: Sheet1
Gene	Forward	Reverse
ADK	GCCATGACGTCAGTCAGAGAA	TCCTTGTGTTTGTCTTCAGCC
ADSL	GGAGGCCGAGCAGACATTG	CAGCTGCCATCTTGAAGTCG
ATIC	GCACTGTTTGAGGAAGTCCC	GTACGCCACACCACTCCTTT
CDA	CTGAACGGACCGCTATCCAG	TCTTGCATGTCACTGGCGAT
DPYS	CGGCAGGAGATGGGAAGTTT	GTAGGTGTGCAAGTCCGGT
ENTPD2	GACCTGGGCTCAGCAGC	CAGGTTCAGCATGTAGCCGA
GMPS	TCAGGGAGTCTGGGTATGCT	AGGCTGCTTTTGAAGTGGGT
PPAT	GCTTACGCAGGAAAGTGTGG	TGGCTGAATGAAGGTTCTCCC
RRM2	CCCACGGAGCCGAAAACTAA	CGGTCCAAAAGGAAGCCTCT
TXNRD1	CGCCGTAGGTCAGCTAAAGAT	GAAGCAGGGCTCTGGAGTCT
UCK2	AGCTAGCGGCAAGAGGTAAA	GCTCAGTCCCAAAGCTGAGT
