# Supplementary material for: A Nucleotide Metabolism-Related Gene Signature for Risk Stratification and Prognosis Prediction in Hepatocellular Carcinoma Based on an Integrated Transcriptomics and Metabolomics Approach
Source: Metabolites. 2023 Oct 30;13(11):1116. doi: 10.3390/metabo13111116 (PMC10673507; doi:10.3390/metabo13111116)
Supplement: Supplementary file 1 [file metabolites-13-01116-s001.zip › Supplementary Table 2 The findings of DEGs between 373 HCC samples and 49 normal samples from the TCGA..xls]

Tag	logFC	AveExpr	t	P.Value	adj.P.Val	B
RRM2	3.72415351159502	1.58554648269832	16.5354255241208	9.44664076306214e-48	9.16324154017028e-46	97.7189385333022
UCK2	2.12648957117129	1.77403436677666	15.785656552728	1.75014951791931e-44	8.48822516190865e-43	90.2254582824644
DTYMK	1.79316460346368	3.01918432898209	14.4150718215213	1.28859363433284e-38	4.16645275100953e-37	76.7772122820689
TK1	2.67846894203464	3.46948307621585	13.9046444077847	1.7834435139384e-36	4.32485052130062e-35	71.8716616011004
NUDT1	2.13840719943089	1.70729736102334	13.6373667683452	2.29777369880555e-35	4.45768097568276e-34	69.3290370908372
CAD	1.79345968863186	1.59119430409541	13.6155588266895	2.82827881938215e-35	4.57238409133448e-34	69.1224140933227
ENTPD6	1.37625597111878	3.45347372863087	13.122309891247	2.99790336789471e-33	4.15423752408267e-32	64.484619740698
NME1	1.5697117644234	3.66161811024679	11.9297162517464	1.73541207913724e-28	2.1041871459539e-27	53.5859788347965
AK6	0.856888272801283	2.85000306156953	11.8694530791067	2.98166527347309e-28	3.21357257252099e-27	53.0483979741845
UCKL1	1.08397036456089	3.20523722473502	11.6643649684158	1.86215755234236e-27	1.80629282577209e-26	51.2291920422979
DUT	1.25595872123893	3.05492639090229	11.4289986205727	1.4942836972806e-26	1.31768653305653e-25	49.1615685766436
IMPDH2	1.31585804010838	4.79794222491205	11.4059256375768	1.83056953740336e-26	1.47971037606772e-25	48.9600686143283
ATIC	1.14139231088468	3.91852036826654	11.1674159562669	1.47365568252278e-25	1.09957385542084e-24	46.889906399667
ITPA	1.18684053272546	4.04547834028	10.9765058350795	7.69316137019951e-25	5.33026180649537e-24	45.2500869955092
TYMS	2.1903545978396	2.29001263762278	10.94052680757	1.04861786959243e-24	6.7416360364495e-24	44.942800150762
GMPS	1.13781002847893	2.0491992555079	10.9336998828176	1.11202243900198e-24	6.7416360364495e-24	44.8845568523353
ADSL	1.01731636540117	2.80168564979023	10.7895410070645	3.82351902718027e-24	2.18165497433227e-23	43.6594578347477
DCTPP1	1.11256225836856	3.58114516387758	10.516704503137	3.86095277476741e-23	2.08062455084688e-22	41.366345864237
NME3	1.13918009742379	4.15550130952884	10.4531291729058	6.58573820825423e-23	3.362192664214e-22	40.836927096386
GUK1	1.00159133095691	5.16030742534818	10.3624444516517	1.40607021461238e-22	6.81944054087007e-22	40.0850383561293
RRM1	1.17134676025442	2.97732957181161	10.1190174080981	1.05670060094497e-21	4.88095039484106e-21	38.0861732151596
NME2	1.31553605673918	3.86752817279642	10.0623507295106	1.6830531216626e-21	7.42073421823967e-21	37.6250052583697
NUDT5	0.795789656676086	3.93207168191455	9.81417475697819	1.26872396844112e-20	5.35070543212126e-20	35.6241905509234
ENTPD1	1.12410515384671	0.222087886754356	9.78383733221776	1.62066707857995e-20	6.55019610926062e-20	35.3817519029633
ADA	1.36430526816795	0.92815814735212	9.46442904029365	2.07381938757132e-19	8.04641922377671e-19	32.8583547339755
PFAS	1.07624440706019	1.09640496796125	9.05750217726238	4.93540744384911e-18	1.80300655013804e-17	29.7232105054762
GMPR2	0.635653937104807	3.51346678029154	9.05532301609432	5.01867802615744e-18	1.80300655013804e-17	29.7066692104594
NT5C3A	1.06488711378694	1.69620422362389	8.85073470846408	2.38591084361907e-17	8.26547685110893e-17	28.1657765304209
NT5C	1.03986038079948	3.20097042794422	8.81183121287849	3.2006788785639e-17	1.07057190076103e-16	27.8754982765988
DHODH	-1.39101263709733	2.52115359944419	-8.78529944358723	3.90877695332228e-17	1.2638378815742e-16	27.6780375235236
DNPH1	0.936928293788032	5.55813518399633	8.73836109097977	5.56123584839869e-17	1.74012863643443e-16	27.3297117932093
TXN	1.14935531346125	7.61466007350189	8.56265004375575	2.05824193209488e-16	6.2390458566626e-16	26.0373419843012
NT5M	1.53257270432009	-0.064774705194972	8.47239183809112	4.00295352667867e-16	1.17662573359949e-15	25.3806720957097
ADSS2	0.906768494587701	2.95239227488989	8.34383335221125	1.02381590405967e-15	2.92088654981731e-15	24.453903161109
CTPS2	0.849272073161448	1.42830732557207	8.31613776705965	1.25175826933814e-15	3.46915863216571e-15	24.2555760595782
TXNRD1	1.51469268057653	4.01082895470992	8.09881792301143	5.96348114584616e-15	1.60682686429744e-14	22.7159361441834
UMPS	0.575937642738056	2.09119891193515	7.82690761219993	4.03543285784579e-14	1.05793780327309e-13	20.8317736008
GART	0.711989170721117	2.18966396623907	7.67332008489074	1.16395778381943e-13	2.97115539553908e-13	19.7887536978009
DCK	1.14042665621019	1.40563434376078	7.45056684809111	5.26451143723049e-13	1.30937848567015e-12	18.303913249913
PPAT	0.877031596390435	0.485992455478716	7.25505301573512	1.92706167074062e-12	4.67312455154601e-12	17.0283965038995
APRT	0.759896635965345	5.47929956623518	7.20897423206448	2.60668419618214e-12	6.16703334218702e-12	16.7316198683748
DGUOK	0.662432009216003	4.0462681098741	6.98531284797029	1.10652787489426e-11	2.55555247297007e-11	15.3122211385586
UCK1	0.601498093595458	3.60477160997127	6.6979066988682	6.74037742779542e-11	1.5205037453399e-10	13.5406516075015
AMPD2	0.685091239658767	2.66140218905114	6.53890333769859	1.78617414507295e-10	3.93770209254718e-10	12.5864031056918
AGXT2	-2.07648887606048	-Inf	-6.47866202784417	2.58342208341371e-10	5.56870982424734e-10	12.2259159547627
ENTPD2	1.65066236960335	-0.26457770760981	6.44783649713108	3.09582974797132e-10	6.43998375166014e-10	12.0483020430444
NUDT18	0.856765358993105	1.22662752010695	6.44652001079156	3.12040449822708e-10	6.43998375166014e-10	12.0405684791279
PUDP	0.792974006026609	1.87007476875104	6.34850659455245	5.60176411069879e-10	1.13202316403705e-09	11.4684509827546
ADK	-0.654486579033232	3.70588698308189	-6.08142957215991	2.66201813974403e-09	5.26970937867696e-09	9.94646064095505
CDA	-1.67533940120772	3.31365416477769	-5.99588638008797	4.33655787809805e-09	8.41292228351022e-09	9.4705633836888
XDH	-1.58570985145582	-Inf	-5.33816745457326	1.53530403183976e-07	2.92008806055797e-07	6.00379421004017
RRM2B	0.567434003383995	2.25654200555019	5.26644601265443	2.21689712943992e-07	4.13536579914753e-07	5.64777444342421
IMPDH1	1.02978323583699	1.13633677806819	4.89816818253978	1.37872483521411e-06	2.52332658520318e-06	3.88268561220346
SAMHD1	0.630546229338282	3.31778840122942	4.87243407932674	1.56016818609121e-06	2.80252433427495e-06	3.76359847539987
AK1	0.566779277880227	1.68661609844157	4.82897491946297	1.92007850229832e-06	3.38632026768977e-06	3.56376059280531
PAICS	0.402961500149965	3.8665641992895	4.66020183809806	4.23714273258079e-06	7.33933651893458e-06	2.80294610417867
DPYS	-1.49925481799552	5.10294016912268	-4.49607314319732	8.94627966129385e-06	1.52243706516755e-05	2.08652890280437
AK9	0.593305725381161	-2.29256027514251	4.39910191669373	1.37678563005447e-05	2.30255527784971e-05	1.67422428674416
ENTPD3	1.54724438073835	-Inf	4.28597003843596	2.38361901236402e-05	3.91883125761542e-05	1.28035488084363
ENTPD8	-1.07757770496538	1.22105376402659	-4.22437387871219	2.93525070466606e-05	4.74532197254347e-05	0.952070824718339
TYMP	0.780596743053871	4.40414643245329	4.20940726674727	3.12818522850676e-05	4.97432733057633e-05	0.891462309828706
AK8	1.15798553043572	-Inf	4.01090452968472	7.17734650785933e-05	0.000112290743751993	0.113549672956603
DPYD	-0.712079627342153	2.4897511231823	-3.79587506863265	0.000168574885642553	0.00025955180805282	-0.704314264275832
GSR	0.508623121915048	4.30747231178209	3.77765953644334	0.000180954020744984	0.000274258437691616	-0.771076860547812
ADAL	0.441463260690894	0.0872693774958858	3.74652764606337	0.000204118281576249	0.000304607281736864	-0.884484589972792
UPP1	0.529106117241497	1.50129229079305	3.73220061733123	0.000215693161708909	0.000317003586147942	-0.936380250644321
AMPD3	0.742806055102139	-1.63329002547984	3.69709803483605	0.00024672083141022	0.000357192845474498	-1.06274237359749
ADPRM	0.378709297453579	1.76242926005816	3.68465834258423	0.00025869096791376	0.000369015057171098	-1.10725412432839
ENTPD5	-0.647431295425615	3.83476465284822	-3.66830451577729	0.000275260215302563	0.000386960012816647	-1.16555734887234
UPB1	-1.22096560563522	3.89289812783397	-3.59482974220705	0.000362789464815688	0.000502722544101739	-1.42449700519531
AMPD1	-0.988604075827245	-Inf	-3.57194494888843	0.000431927300819596	0.000590097861683109	-1.4802088854191
NUDT16	0.292904012263677	3.0254607363908	3.38173166068345	0.000787166637812799	0.00106048838705335	-2.14754048817162
PNP	-0.454100710259106	2.71183803716101	-3.32357777843096	0.00096589191390717	0.00128344541984925	-2.33759488248169
NT5C1B	-0.625181240165004	-Inf	-3.30271396801369	0.00104394736838548	0.00136841749639718	-2.40441168293352
NT5E	-0.610226229576207	2.95809816813981	-3.21133449977092	0.00142187735806333	0.00183896138309525	-2.69556159702356
GDA	-1.15253986358359	-Inf	-3.09417091298982	0.00210498405611045	0.00268662438740413	-3.05660511786142
NME4	0.390656635909927	4.32759482120872	2.98979089687609	0.00295431392988355	0.00372166819738577	-3.36765376798775
NUDT15	0.252070645732017	2.43497705912906	2.72715695197842	0.00665353359468672	0.00827426613698221	-4.10464049823121
ENTPD4	0.341679811694289	1.04343088978594	2.69338167844762	0.00735382146165214	0.00902937571873744	-4.1946802972763
UPP2	-1.13943975613541	-Inf	-2.58118783543283	0.0101827838462016	0.0123466254135194	-4.48575633486419
GMPR	-0.698859251721717	0.506762131637078	-2.49028291340745	0.0131462504550206	0.015743040668358	-4.71319556361022
NUDT9	0.235924431341549	3.28013931460882	2.43929152500299	0.0151254168529583	0.0178922613992311	-4.83718447401312
NT5C1A	0.633978551908017	-Inf	2.13246040405741	0.0357935578090859	0.0403718035753643	-4.85274289019431
AK2	0.183716174184537	4.05287416209508	2.40731241183765	0.0164970270308538	0.019279658096299	-4.91367121944605
GLRX	-0.3519395426785	2.64083139356696	-2.2985522962697	0.0220163076106094	0.0254235933122513	-5.16644328200864
HPRT1	0.269433474468463	3.89617283258498	2.17656734822375	0.0300642960674216	0.0343086672769399	-5.43638317924795
AK4	-0.348664623729903	3.45999814119554	-1.73187911050778	0.0840227437162016	0.0936805303502477	-6.29812390459621
NUDT13	0.222569747463458	0.546487322380508	1.53652194771614	0.125156653813533	0.137956766135372	-6.61558564034431
ENTPD7	0.214379439190844	0.757422838950356	1.46760066154226	0.142954469314999	0.155804309253426	-6.7186311628525
NT5C2	0.221897531890585	0.683737211664407	1.08283058763591	0.279499331695984	0.301238168605671	-7.20771162642092
AK7	0.217186036307931	-Inf	1.07197179430438	0.284345656026532	0.303093721259051	-7.21907245442562
CMPK1	-0.0808787869082712	5.33049072468822	-1.03939712065869	0.299212717254941	0.315474277975319	-7.25370876974294
AK5	0.253072627019928	-Inf	0.961900890197682	0.33672288378872	0.351205588467805	-7.28568053594273
TK2	-0.0769736887355266	2.11568011866306	-0.845833876524063	0.398122739797874	0.41082878468504	-7.43590354188654
ADSS1	-0.110667828303563	0.875874582726388	-0.572766052068527	0.567106856180687	0.579045947889754	-7.62948527614775
CTPS1	0.0482711546539427	2.76219474327415	0.364180425230315	0.715904913365231	0.723362256212785	-7.72721617867716
DCTD	0.0189227507115115	3.65281677306285	0.200754676173536	0.840986713815413	0.840986713815413	-7.77340101632363
