# Supplementary material for: A Nucleotide Metabolism-Related Gene Signature for Risk Stratification and Prognosis Prediction in Hepatocellular Carcinoma Based on an Integrated Transcriptomics and Metabolomics Approach
Source: Metabolites. 2023 Oct 30;13(11):1116. doi: 10.3390/metabo13111116 (PMC10673507; doi:10.3390/metabo13111116)
Supplement: Supplementary file 1 [file metabolites-13-01116-s001.zip › Supplementary Table 3 The findings of HCC samples from the TCGA database that underwent univariate Cox regression analysis..xls]

id	HR	HR.95L	HR.95H	pvalue	FDR
UCK2	1.138935529	1.097712825	1.18170628	4.63E-12	4.49E-10
TXNRD1	1.014153223	1.009709434	1.01861657	3.55E-10	1.72E-08
CAD	1.135446118	1.0887235	1.184173838	3.12E-09	1.01E-07
ATIC	1.042398577	1.027293907	1.057725336	2.46E-08	5.97E-07
PPAT	1.524286756	1.310224805	1.773321728	4.77E-08	9.26E-07
GMPS	1.160762756	1.096415929	1.228885992	3.00E-07	4.85E-06
RRM2	1.05370756	1.03220065	1.075662586	6.62E-07	9.17E-06
ADSL	1.071653793	1.04194444	1.10221026	1.40E-06	1.70E-05
RRM1	1.049556127	1.028550259	1.070990993	2.75E-06	2.96E-05
GSR	1.018676879	1.010721441	1.026694935	3.73E-06	3.62E-05
ENTPD2	1.093656492	1.052442491	1.136484448	4.92E-06	4.34E-05
DTYMK	1.036638849	1.020455928	1.053078407	7.38E-06	5.97E-05
IMPDH1	1.052241325	1.028485766	1.07654558	1.24E-05	9.24E-05
GART	1.174961584	1.091047865	1.265329201	2.00E-05	0.000138566
AK6	1.108207567	1.055908295	1.163097227	3.11E-05	0.000200839
DCK	1.106056244	1.050173038	1.16491318	0.000138606	0.000840298
UMPS	1.200834718	1.088143893	1.325196079	0.00027255	0.001555141
AK9	4.058043518	1.861843004	8.844847369	0.000425795	0.002294565
AK2	1.047885898	1.020319649	1.076196911	0.000584085	0.002981905
PFAS	1.17871608	1.071753959	1.296353127	0.000704834	0.003418446
TYMS	1.028889858	1.011788776	1.04627998	0.000867002	0.004004723
ADA	1.090182426	1.034502098	1.148859653	0.001246097	0.005494155
NT5C3A	1.085657642	1.032329412	1.141740711	0.00138344	0.005834506
PAICS	1.041785138	1.015172034	1.069095915	0.001932208	0.007809342
TK1	1.01183802	1.004181266	1.019553156	0.002392657	0.009283509
PNP	1.049139446	1.017096367	1.082192026	0.002436608	0.009090423
UPB1	0.98442465	0.974231444	0.994724507	0.003116626	0.011196769
DPYS	0.994040626	0.989822604	0.998276623	0.0058696	0.020333972
AK4	1.02340199	1.005742142	1.041371928	0.009196224	0.030759783
PUDP	1.046423917	1.011190434	1.082885061	0.009410287	0.030426596
CTPS2	1.125290784	1.029300156	1.230233321	0.009465049	0.029616445
ADK	0.964750169	0.938183254	0.99206939	0.011774588	0.03569172
UCKL1	1.03869914	1.008388022	1.069921379	0.011979066	0.035211195
DCTPP1	1.017884562	1.003541986	1.032432121	0.014353134	0.040948647
NUDT5	1.025572951	1.004882159	1.046689773	0.015169084	0.042040032
CDA	1.010993285	1.002022043	1.020044848	0.016210275	0.043677686
NME1	1.011489947	1.002091553	1.020976487	0.016456009	0.043141428
ITPA	1.013772836	1.002335477	1.025340703	0.018130998	0.046281757
NT5C2	1.121840921	1.016195997	1.238468816	0.022706121	0.056474197
TXN	1.001003866	1.000139906	1.001868573	0.022755781	0.055182768
AMPD2	1.047943568	1.005743373	1.09191445	0.025545643	0.060437254
ENTPD6	1.026554023	1.002911372	1.050754026	0.027488907	0.063486285
NME2	1.014438459	1.001178715	1.027873818	0.032724434	0.073820236
AGXT2	0.977620444	0.956918738	0.998770006	0.038203095	0.084220459
NT5C	1.011827813	1.000452323	1.023332646	0.041514156	0.089486069
NT5C1B	20.64006349	1.093461501	389.5996525	0.043427872	0.091576165
DGUOK	1.014846548	1.000387129	1.02951496	0.044132768	0.09108252
HPRT1	1.013495707	1.000330375	1.026834308	0.044486346	0.08989949
ADSS1	1.062043337	1.001273331	1.12650164	0.04525327	0.089583004
ADSS2	1.032111198	1.000284449	1.064950602	0.047955704	0.093034067
GUK1	1.00670392	0.999642091	1.013815636	0.062843652	0.119526161
IMPDH2	1.004559968	0.999715194	1.009428221	0.06511287	0.121460545
NME4	1.008012179	0.999377887	1.016721068	0.069036501	0.126349823
AK7	1.605517137	0.96163137	2.680533684	0.070239766	0.126171432
NUDT1	1.014176407	0.998346243	1.03025758	0.079471528	0.140158877
DCTD	1.021866244	0.997212926	1.047129047	0.082568456	0.143020362
AMPD3	1.23075957	0.963468092	1.572204761	0.096501414	0.164221705
NUDT15	1.052089989	0.989867603	1.118223631	0.102564981	0.17153109
NT5E	1.013688494	0.996881312	1.030779041	0.110982081	0.182462066
CMPK1	1.007732147	0.998166902	1.017389055	0.113443619	0.183400517
TYMP	1.004125174	0.99833825	1.009945643	0.162718082	0.258748426
ENTPD1	1.134968523	0.946672274	1.360717519	0.171353514	0.268085336
UPP1	1.023859423	0.989497366	1.059414764	0.175807444	0.270687651
TK2	0.941023298	0.860170066	1.029476475	0.184780033	0.280057238
RRM2B	1.03392401	0.98234121	1.088215426	0.201376082	0.300515077
XDH	0.988677682	0.970402845	1.007296675	0.231611968	0.340399408
DHODH	0.981243598	0.951213855	1.012221378	0.232486837	0.33658542
ENTPD3	1.172352366	0.900171154	1.52683194	0.2381164	0.339666041
CTPS1	1.018207737	0.986090495	1.051371047	0.269849163	0.379353172
ENTPD4	1.061931757	0.951555431	1.185111261	0.283209624	0.392447622
GMPR	1.011391423	0.990372276	1.032856669	0.290466166	0.396834057
GLRX	1.010802588	0.990442913	1.03158078	0.300685789	0.405090577
AMPD1	0.164917698	0.005390425	5.045585198	0.30177484	0.400988486
ADPRM	0.958240954	0.883244607	1.039605245	0.304959577	0.39974431
AK8	0.888142755	0.698526888	1.129230052	0.332997256	0.430676452
GMPR2	1.020508228	0.978943563	1.063837674	0.338631029	0.432200129
SAMHD1	1.009678804	0.988764696	1.031035281	0.367082662	0.462428808
NT5M	1.037864126	0.9494654	1.134493098	0.413212325	0.513866609
NUDT16	1.0166817	0.975703332	1.059381111	0.430598968	0.528710126
ENTPD8	0.980232352	0.929336847	1.033915169	0.462991567	0.561377275
ENTPD7	0.954167154	0.841252332	1.082237662	0.465327072	0.557243531
APRT	1.001296455	0.997809832	1.004795262	0.466620506	0.551977916
DPYD	1.011534348	0.980581081	1.043464695	0.469523169	0.548719848
UCK1	1.007142912	0.986194602	1.028536196	0.50689118	0.585338625
AK5	2.201296036	0.204162651	23.7345284	0.515453925	0.588223891
NME3	1.003725556	0.992186357	1.015398956	0.528484101	0.596080905
NT5C1A	5.670145032	0.016744939	1920.015665	0.559309029	0.623597423
AK1	1.01673253	0.958269397	1.078762445	0.58286874	0.642480315
DUT	1.007919675	0.978542692	1.038178589	0.601182748	0.655221646
UPP2	1.003773766	0.988892886	1.018878574	0.621108597	0.669417043
NUDT9	1.008485481	0.973543371	1.044681723	0.638605126	0.680710959
NUDT18	1.010511511	0.94553464	1.079953575	0.757801341	0.798986196
GDA	1.004060971	0.976696678	1.032191935	0.773755208	0.807035002
NUDT13	1.012080401	0.88349346	1.159382367	0.862488639	0.890014872
ADAL	0.992520136	0.757596195	1.300291933	0.956551284	0.976689206
ENTPD5	0.999672681	0.986887966	1.012623017	0.960241946	0.970244466
DNPH1	0.99987554	0.99450704	1.005273021	0.963857407	0.963857407
