# Supplementary material for: A Nucleotide Metabolism-Related Gene Signature for Risk Stratification and Prognosis Prediction in Hepatocellular Carcinoma Based on an Integrated Transcriptomics and Metabolomics Approach
Source: Metabolites. 2023 Oct 30;13(11):1116. doi: 10.3390/metabo13111116 (PMC10673507; doi:10.3390/metabo13111116)
Supplement: Supplementary file 1 [file metabolites-13-01116-s001.zip › Supplementary Table 4 The results of DEGs between two NMRGs clusters..xls]

Tag	logFC	AveExpr	t	P.Value	adj.P.Val	B
UBE2I	0.653592046665676	2.34229087122992	14.674259056732	9.8126273954405e-39	1.01933573383836e-34	77.1893307720174
TPD52L2	0.8421135899033	3.55262511778925	14.3278417516693	2.44650926625576e-37	1.27071691289324e-33	74.0195096909126
KIF2C	1.0834876946852	1.54106331712204	13.454012097343	7.38702969725547e-34	2.55788214983633e-30	66.1225202407336
CDC20	1.80002891555356	2.32681970687487	13.3150861317667	2.60187913984038e-33	6.75708012616547e-30	64.8817323082034
CDT1	1.30193938636504	1.51919073988774	13.2102387777713	6.70948457391385e-33	1.39396251507634e-29	63.9482441363204
MYBL2	1.9839972616211	1.96345482791151	13.0964450911918	1.87030612529037e-32	3.23812333825272e-29	62.938043602475
MFSD5	0.67772342726336	2.99396709638155	13.0471737790792	2.91250307974048e-32	4.10345620481516e-29	62.5016085182379
DPYS	-1.75468253643735	5.02565310200811	-13.2624560736859	3.16015110112835e-32	4.10345620481516e-29	62.41161731705
RALY	0.773614984690637	3.43547075914869	12.9247482895024	8.73134434513073e-32	9.70334930346188e-29	61.4197834799641
G6PD	1.84645054354725	2.35901267382196	12.9172093838972	9.34092154742191e-32	9.70334930346188e-29	61.3532878259281
CENPO	0.564769307757866	1.00403513525788	12.8868356116519	1.22576917333175e-31	1.06481194315813e-28	61.0855269837481
ALDOA	1.56206441787372	5.01244364279648	12.8864459152	1.23004845185768e-31	1.06481194315813e-28	61.082093127416
NAP1L1	0.815852981851687	3.12491670648438	12.6825530308412	7.5764548688298e-31	6.05417024441569e-28	59.2908564628481
SMYD5	0.729855181380117	2.5240617665998	12.6596503015269	9.28658019646126e-31	6.89064250577426e-28	59.0903355038992
RNPS1	0.53110700680975	2.67689296331215	12.6423108857938	1.08326346302405e-30	7.50196056926253e-28	58.9386167344076
BIRC5	1.47366326035738	2.04529951963676	12.5987648591607	1.59417491222897e-30	1.03501806176466e-27	58.5579494550551
MAPRE1	0.977684247777738	3.58474523654244	12.5523905666207	2.40430662603525e-30	1.46917277830907e-27	58.1531252421318
SPATS2	0.619491333964459	1.68904647739027	12.5393549986853	2.69839900274944e-30	1.55727604669784e-27	58.0394373996937
SNRPB	1.1564808732273	5.97214242552039	12.4943891852731	4.01628417262457e-30	2.19585052553811e-27	57.6476345358556
DAZAP1	0.496355531600884	2.92153869490511	12.4551236859461	5.68129526229994e-30	2.95086475923859e-27	57.3059603442393
GIT1	0.671736923677523	2.37096867669102	12.3543355055998	1.38104490191008e-29	6.83156878144853e-27	56.4309270906663
TCOF1	0.581434884488223	1.91919198126682	12.2316474557254	4.05582004318209e-29	1.91508448220798e-26	55.3696984042389
PLK1	0.991666287959643	1.37474003844968	12.1703843855959	6.93407501508493e-29	3.13179005463923e-26	54.8414355745833
PTTG1	1.21524924586576	2.69259766862411	12.1337778622483	9.54833815943328e-29	4.13283903334137e-26	54.5263158197535
SNRPA	0.736222699247958	3.76159914114375	12.1287083768686	9.98056600177588e-29	4.14712478505791e-26	54.4827078604511
DCTN5	0.430168880964098	1.66092215040351	12.0949070603313	1.34050925220748e-28	5.3558500430505e-26	54.1921452596769
CCNB1	1.29420549624049	2.5816635116105	12.0526319929265	1.93771762478997e-28	7.45518914308081e-26	53.8292279816646
NEK2	0.929441077011426	1.53748733097584	12.0196634374052	2.58178246719575e-28	9.57841295329625e-26	53.5465826984711
CANT1	0.67030767313305	3.08384013705126	11.9999292668322	3.06513988450402e-28	1.0979542455251e-25	53.3775579654532
E2F6	0.414201266727147	1.51314893800866	11.9864084657973	3.44734404529199e-28	1.19370033141644e-25	53.261820640605
HMGA1	1.95504357453536	3.96202794003021	11.9961221952817	3.77630315714062e-28	1.26542700633473e-25	53.1728099354985
MCRS1	0.620830770298804	3.30196361306243	11.9682243911269	4.03721409318277e-28	1.31058062499946e-25	53.1062552522901
TRIM28	0.907057529431406	4.83392524253132	11.9575889822144	4.42773771771223e-28	1.39379816398772e-25	53.0153165775245
DLGAP4	0.656028987704376	2.52639582291982	11.909911162198	6.69514088866471e-28	2.04556245739556e-25	52.6080788107306
NME6	0.400057627610775	1.63587161363286	11.8908668719401	7.89593012156731e-28	2.34351206008118e-25	52.4456124130051
PPIH	0.686681938810222	2.87219041938142	11.8336845973547	1.29485400991907e-27	3.73637318195537e-25	51.9584817678508
LCMT1	0.554706543429354	2.45609355105491	11.8179279719505	1.4836608034089e-27	4.16547795292207e-25	51.8244355564673
AURKB	1.11565680661834	1.66188817922345	11.7714769786467	2.21514852984456e-27	6.05551656000665e-25	51.4297273588911
TACC3	0.919918781858947	2.0346501072174	11.7374643178888	2.96939972755382e-27	7.90926265893054e-25	51.1411537003208
DHX34	0.62563174683955	1.97669240091176	11.7291523322531	3.18966450027556e-27	8.28355870721562e-25	51.0706894958542
CLIC1	1.45992586950218	5.5806936069244	11.7018121580522	4.4243719646335e-27	1.12098477972226e-24	50.7492669149842
CHEK1	0.558280993702568	1.03348189237499	11.6492379765472	6.33903958270868e-27	1.56785579012328e-24	50.3943771958569
CENPM	1.06984133007682	1.77020480345861	11.579648131243	1.15085326378996e-26	2.78024737308143e-24	49.8071635242925
UBE2M	0.742056208506947	4.32615543292373	11.5354808053134	1.67894034737567e-26	3.96382552921329e-24	49.4353128921777
STX6	0.529745416056794	1.7425294553281	11.5277104221978	1.79415950400463e-26	4.14171753946669e-24	49.3699612046227
CCNF	0.554497443591432	1.17502602001902	11.5177337380013	1.95370300064156e-26	4.41197103710098e-24	49.2860837841478
SFPQ	0.653310834840684	3.77693585079639	11.4771667999444	2.76150388800019e-26	6.10351114649914e-24	48.9453728016543
NUP62	0.655546239470451	2.68318039576167	11.4635483066895	3.10129489737552e-26	6.71171904040352e-24	48.8311208872636
UBE2Z	0.656355385688926	3.29801876762603	11.4439445153099	3.66472669691469e-26	7.76922059745914e-24	48.6667674235981
POLD1	0.730472320793116	2.07243255695466	11.4347596951009	3.96268070095117e-26	8.23286542429615e-24	48.5898096657648
KHDRBS1	0.585082356921136	4.1495478620519	11.4300085523366	4.12614570085944e-26	8.40439245892704e-24	48.5500122312819
PPM1G	0.638275712115678	4.02964703070527	11.3971904876409	5.45399796627759e-26	1.08954097834022e-23	48.2753287959719
ATIC	0.717310066388672	3.76303701104461	11.3849693638695	6.05056966536571e-26	1.18591165441168e-23	48.1731350270346
TPX2	1.24740793092992	2.54269028693048	11.3632037651938	7.27829064683955e-26	1.40012746739573e-23	47.9912588604708
RFC4	0.73804913870532	2.44495410621786	11.3587447395596	7.55888202375632e-26	1.42766666295965e-23	47.954019117044
HDAC1	0.685045256614766	3.84849177056522	11.3277974677798	9.8263427639309e-26	1.82278658270918e-23	47.6957540006957
COPZ1	0.524580265329841	4.58026339051605	11.3043609156885	1.19833414263291e-25	2.1623979546313e-23	47.5003928751839
ASF1B	1.07897943785647	1.77424873605174	11.3034756786657	1.20734579677142e-25	2.1623979546313e-23	47.4930175718153
ABCB4	-2.00003084804918	2.81786909870554	-11.2934832842579	1.31386572798188e-25	2.31329443767386e-23	47.4097857494422
TRAF2	0.749078987065863	2.54095853853159	11.2750476299633	1.53552441980668e-25	2.65850461215864e-23	47.2563186840289
MOGAT2	-2.18214058903071	1.09221328433779	-11.24035418367	2.05839100201984e-25	3.50533864409543e-23	46.9678426126117
ZWINT	1.03378474470522	2.56471748015502	11.2220247287672	2.40266557055328e-25	4.02562741079153e-23	46.8156071487714
CKAP4	1.15526907587045	4.29072556519792	11.2179579844351	2.48649852500244e-25	4.09995979011513e-23	46.7818471280654
KIFC1	1.12791030965386	1.91302737954089	11.214609909261	2.55769617368253e-25	4.15146060190845e-23	46.7540575965345
EZH2	0.684485029496664	1.73765756459118	11.2072855496127	2.72060118877681e-25	4.34793925369439e-23	46.6932783803268
CEP55	0.699804875092868	1.07246760152366	11.1937867242687	3.0483500365086e-25	4.79791820897748e-23	46.5813127357779
RAD51	0.535851918547614	1.0355121735068	11.1828317686345	3.34298460264997e-25	5.18312299288476e-23	46.4904955690494
EIF2S2	0.608003856878094	4.25308264602635	11.1809535993089	3.39626994243806e-25	5.18830178853626e-23	46.4749298086142
MKI67	0.852102942193552	1.5199392648991	11.1766155795308	3.52259528398969e-25	5.27819493863416e-23	46.4389823585908
KIF11	0.702129554629917	1.28896411008248	11.1754697724648	3.55673513385051e-25	5.27819493863416e-23	46.4294886489665
BUB1	0.681982280697427	1.01396904558118	11.1689156810429	3.75844014046465e-25	5.43930184937717e-23	46.3751931653501
CIZ1	0.678260670815648	2.7735356848075	11.1681135730909	3.78389425023181e-25	5.43930184937717e-23	46.3685494041165
EXO1	0.551614721351864	1.17689145420552	11.1669108902704	3.82238193111796e-25	5.43930184937717e-23	46.3585881686107
BAK1	0.927869085666722	2.432445449085	11.1613199132272	4.00647820860522e-25	5.62331800164336e-23	46.3122877337809
GSK3A	0.549846868161441	3.08360103331079	11.1597434836884	4.05996197654267e-25	5.62331800164336e-23	46.2992349369747
FKBP1A	0.757150034125959	4.93695048018061	11.1505235337986	4.38730113614637e-25	5.99674792135375e-23	46.2229121014498
PPT1	0.873678989271528	3.67172820209885	11.1396399422985	4.80764143640987e-25	6.48594535602931e-23	46.1328574997148
CCNB2	0.936572694690037	1.88345356687668	11.1325056140536	5.10467931064128e-25	6.79838572806943e-23	46.0738490658236
LIMK1	0.813064288210798	1.38020297191369	11.1303020168138	5.20006488170422e-25	6.83775620141056e-23	46.0556267490554
PAFAH1B3	1.64933627326219	2.59739845374214	11.1273760393649	5.32946524221418e-25	6.92031061701511e-23	46.0314335629645
MCM6	0.876369173173947	2.73929429155272	11.1221725045982	5.5675534377069e-25	7.14021544579003e-23	45.9884163381704
PFDN4	0.65615357283369	2.45786774648006	11.1142122044565	5.9524069911005e-25	7.5406833931161e-23	45.9226283433638
CDCA8	0.947772884865193	1.75672365513727	11.108559014355	6.24168113111074e-25	7.81187754096125e-23	45.8759216034539
RACGAP1	0.704714763882112	2.0440192759605	11.1008698253014	6.65770766286454e-25	8.23336514307581e-23	45.8124122532374
SMARCD1	0.645210124638723	2.55863162624347	11.0957639589772	6.94908765696049e-25	8.49260265653007e-23	45.7702520355158
TROAP	0.840236267727218	1.47870503165285	11.0773186839817	8.11144084910077e-25	9.79786599307661e-23	45.6180255312586
ELOVL1	0.696710239429533	3.90056103420364	11.0740095255989	8.33955503477173e-25	9.95762042542629e-23	45.5907287531739
STMN1	1.23060155132012	2.91867155554864	11.0702175051322	8.60881058880289e-25	1.01623095905096e-22	45.5594538911322
PRR11	0.464647138807992	1.89993085363816	11.0541149597149	9.85188684077966e-25	1.14990337642718e-22	45.4267067048434
PFKFB1	-1.54733847398851	2.1039041026112	-11.0481440316524	1.03568888593318e-24	1.19541512745266e-22	45.377507621666
CDC6	0.883067848566869	1.50080008804382	11.042962085034	1.08159805045101e-24	1.22230518279038e-22	45.334820296861
KIF4A	0.831410570260321	1.58653477404131	11.0428603840774	1.0825190298105e-24	1.22230518279038e-22	45.3339826146768
SNRPD1	0.64118461188033	2.55798751676324	11.0382896108399	1.12472623655782e-24	1.25630711240459e-22	45.2963384114788
SNRPA1	0.566900822127181	2.55306326693396	11.0309203093014	1.19624893125562e-24	1.32198232956207e-22	45.2356623203657
UCK2	0.682319132271075	2.22560835738808	11.0171007033979	1.34279120434835e-24	1.46830684534428e-22	45.1219313883064
NUDT1	0.862142631296712	2.03256206375782	10.966435901532	2.04992195285064e-24	2.21818637981379e-22	44.7055877938194
CHAF1B	0.650977756839825	1.05066762151087	10.9288677869507	2.80351717571567e-24	3.00236457951901e-22	44.3974919428107
EDC3	0.487933735558976	1.96683359098123	10.9228815149623	2.94677726094782e-24	3.12358389660469e-22	44.3484479505755
TCF3	0.723942621146017	2.30705957052103	10.9012241526825	3.52860427963168e-24	3.70253952089029e-22	44.1711285725252
GINS1	0.672288374304836	1.79033020477762	10.8898571343951	3.87833290985519e-24	4.02881222675758e-22	44.0781328026621
PPP2R1A	0.665706204515433	4.23876908648389	10.860044310674	4.96805996966418e-24	5.10972346186847e-22	43.8344632150718
CREB3	0.675014544319062	3.61392857506281	10.8365909600958	6.035105901572e-24	6.14634118681666e-22	43.6430115323973
RAN	0.749101580074491	4.28475927488892	10.8332747901489	6.20333241773484e-24	6.24333455946782e-22	43.6159584637943
DCTN2	0.559179827611972	3.69280533492781	10.8323601408776	6.25054672877025e-24	6.24333455946782e-22	43.6084975697867
CENPA	0.717986551870179	1.2385370564746	10.8200152071034	6.92387169013526e-24	6.85001705877382e-22	43.5078302235503
RRM2	0.923701665944254	2.4380857684965	10.8124241362538	7.37322714937622e-24	7.22576260638869e-22	43.445957753752
RBMX	0.545730621190219	3.46552762996706	10.8064596669456	7.7465408192947e-24	7.5206603767134e-22	43.3973588749565
EFNA4	0.901653635635038	2.53994620845095	10.8030068511245	7.97117890746199e-24	7.66709319358473e-22	43.369231416417
MAD2L1	0.576462349933697	1.34519135349159	10.7955504845755	8.47862478396086e-24	8.08036277576013e-22	43.3085058738689
NCAPD2	0.857903036414374	2.00077984768137	10.7928534259255	8.66997890019476e-24	8.18761280138392e-22	43.2865460258108
CPSF6	0.52322552475598	2.42639920713293	10.7749032984896	1.00576296904384e-23	9.41249164182645e-22	43.1404655797777
U2AF2	0.640123595543245	4.05538533113643	10.7680096828326	1.0647395448759e-23	9.85417252002751e-22	43.0843978347311
XPO6	0.47587838088	2.83026070330226	10.7671952403646	1.07193058795062e-23	9.85417252002751e-22	43.0777749671636
SAE1	0.724575328584627	3.86349488040439	10.7592834252448	1.14434962385239e-23	1.04276349934901e-21	43.0134513130019
DTL	0.674995730346386	1.76368951816775	10.7576274035568	1.16011258069688e-23	1.04793473811123e-21	42.9999908298349
DGKZ	0.400292563498165	1.97399800677828	10.7436738496289	1.30179832020982e-23	1.16578284054652e-21	42.8866161365049
SOX12	0.980830791847102	2.13671170676376	10.7267769058654	1.49657825696727e-23	1.32875683191247e-21	42.7494282302208
TBC1D10B	0.460473908468191	2.11575874774691	10.7234972956602	1.53761417385762e-23	1.35362169813838e-21	42.7228137682681
MELK	0.726720150549016	1.6509202112658	10.7064067328846	1.77026444280082e-23	1.5453367253626e-21	42.5841902216629
NUP37	0.417639832177872	2.14842223793001	10.6887878399202	2.04676716081565e-23	1.77181810554608e-21	42.4414020747201
RBCK1	0.793401329183709	4.24498671815529	10.6657231835229	2.47457339645054e-23	2.12445193738249e-21	42.254665930597
VPS72	0.59975788402603	2.94661219401562	10.642479450752	2.99557294218989e-23	2.55052045207601e-21	42.0666939950224
DDX27	0.491113225972184	2.86067762430736	10.6414922900805	3.01996549485319e-23	2.55052045207601e-21	42.0587156020397
PPP1CC	0.518650198220859	3.41759979001183	10.6305401346852	3.30420364994616e-23	2.76806996093876e-21	41.9702246304373
EPS8L3	1.39132233467391	1.76891956339041	10.6272617581475	3.39434747086427e-23	2.82083852218704e-21	41.9437454098989
B4GALT3	0.583050645877123	3.00871782510583	10.6193714441492	3.62145137394397e-23	2.98568546607381e-21	41.8800335364972
YTHDF1	0.439384034479686	3.61035383118567	10.6160732257562	3.7208017068356e-23	3.04344001028411e-21	41.8534088271858
MPZL1	0.805289001471552	2.88437176372571	10.612113062906	3.84367694508981e-23	3.11938407074945e-21	41.8214463690835
PRMT1	0.702517571205241	3.30954015293647	10.6021146129278	4.17215089120468e-23	3.35971344634373e-21	41.7407769444494
FTSJ1	0.517331191619189	2.56771875436674	10.601080900297	4.20766313511271e-23	3.36224651135006e-21	41.7324390432786
NDRG3	0.705491769447089	2.66191108313456	10.5871235785118	4.71762639946563e-23	3.74096969753045e-21	41.6199017331877
NCAPG	0.689441179118477	1.54803781132179	10.5795048402909	5.02144801705625e-23	3.95172742433184e-21	41.5585052883715
CSNK1D	0.504582162885915	3.08480473770477	10.5681950775678	5.50867852838967e-23	4.30256786112119e-21	41.4674075384684
SF3B4	0.860800304948055	4.48795364998659	10.5617989053522	5.80474135011495e-23	4.49997411529807e-21	41.4159106220558
ARFGAP1	0.574740265397235	2.9773805007104	10.5302814693049	7.51118276548653e-23	5.77971604206475e-21	41.1623994818309
HCFC1	0.565695878236165	2.54337755130446	10.5229950121231	7.97185474377003e-23	6.08909022634434e-21	41.1038481988581
NUP85	0.508720735969446	2.65377547102495	10.5183894497568	8.27740632862388e-23	6.27632824392299e-21	41.0668507609437
MAPK3	0.592100655482415	2.88607752725667	10.5140332452008	8.57711675867495e-23	6.45645571660256e-21	41.031864430331
SYNGR2	0.783470077861921	4.344388179955	10.4934429468654	1.01463304431245e-22	7.57673773418901e-21	40.8666009039405
C15orf39	0.735719753114807	1.77973352089201	10.4926610658222	1.02112368385297e-22	7.57673773418901e-21	40.8603287266286
RIT1	0.570831785214315	1.88873848869865	10.4908140489195	1.0366206969502e-22	7.63717432618348e-21	40.8455131231489
DENR	0.496260822116611	3.36689121121969	10.4887308306214	1.0543801615278e-22	7.71331064644419e-21	40.8288045394995
COPS7B	0.443668117264219	2.10395268457219	10.479581487823	1.13602769870258e-22	8.25248652735832e-21	40.7554427408506
CDCA3	0.57715438635392	1.20133457778415	10.4733689290712	1.19501946775565e-22	8.6207376604484e-21	40.7056484337918
ARPC3	0.663690500255408	4.97947335171078	10.4671237871562	1.2573884149015e-22	9.0081040372392e-21	40.6556089644918
TRIP13	0.660382328863182	1.34251397173748	10.451058559012	1.43309260381439e-22	1.01965520331671e-20	40.5269594393885
LMNB2	0.801808997466729	2.14551138042443	10.4481505975763	1.46741031166418e-22	1.03073867551087e-20	40.503684011092
TSN	0.566337277501889	3.4313635086403	10.4480581283557	1.46851486306901e-22	1.03073867551087e-20	40.5029439413916
E2F1	1.43605677505034	2.18237718625349	10.4437103755701	1.52139255395065e-22	1.0606862986872e-20	40.4681510514787
PKMYT1	0.541399959331711	1.13266707453509	10.4321204788521	1.67177620363873e-22	1.15776074689327e-20	40.3754410928292
CLTA	0.726551393892295	4.87131673099842	10.4308688398862	1.6888755117939e-22	1.1618568752659e-20	40.3654323021936
STIP1	0.769787608726652	4.04010405235096	10.4201610985889	1.84244661148854e-22	1.25916680264098e-20	40.2798338726739
SLC1A5	1.55786149654801	1.82788004393514	10.4179414831585	1.87597640311696e-22	1.27370214873066e-20	40.2620960625993
NCAPH	0.684585868504536	1.34041533940876	10.3829032174755	2.49316776739991e-22	1.68175498491885e-20	39.982363105051
CDCA4	0.608560421542477	1.69522522891872	10.3789314933092	2.57477644323253e-22	1.72559856079352e-20	39.9506865746798
PLXNA1	0.579684825270773	1.53965463672112	10.3738848655076	2.68231116511443e-22	1.78614412712876e-20	39.9104466477531
NUP43	0.433627778289402	2.51673232486146	10.3730282358766	2.70100240979111e-22	1.78713458808344e-20	39.9036172599124
RNF24	0.408721427439776	1.12897623135872	10.3689583447843	2.79158882856221e-22	1.83538131336103e-20	39.8711746838135
METTL9	0.457346778927117	2.20938850483699	10.3523993918045	3.19234646313382e-22	2.0856663559141e-20	39.739248810849
ASB6	0.42999940077887	1.87573605901869	10.3473740597933	3.32491539066744e-22	2.15870131739084e-20	39.6992345291746
CENPF	0.747724219257909	1.43169622788716	10.3395497450799	3.54229022308082e-22	2.2855472569791e-20	39.6369544269932
BUB1B	0.589193487277421	1.44582475590451	10.3345498189471	3.68853371499502e-22	2.36521532292396e-20	39.5971694209369
TOP2A	1.15971168893817	2.38017583392847	10.3272530779119	3.91278680230088e-22	2.4888542944441e-20	39.5391272757264
ZNF207	0.366967939198074	2.54669585850507	10.326733397811	3.9292655399387e-22	2.4888542944441e-20	39.5349943205831
CSE1L	0.653778810446157	3.72355214858359	10.322248020844	4.0743905584761e-22	2.5651375225121e-20	39.4993273744096
RAE1	0.406437621327616	2.29296576296248	10.3192751342577	4.17350091868618e-22	2.60814028871721e-20	39.4756921682458
MCM3	1.0727227302057	3.62451742026913	10.3187011838964	4.19290939753345e-22	2.60814028871721e-20	39.4711295461371
FEN1	0.916556100214847	3.06566853468988	10.316548940467	4.26649080932817e-22	2.63811348376792e-20	39.4540215115901
POLR2H	0.560605022016141	3.31524014315243	10.3145321019196	4.33660687658246e-22	2.66560190733364e-20	39.4379915764432
SMPD2	0.555245589265174	1.83014969425362	10.3077055564193	4.58253926204031e-22	2.80020105023969e-20	39.3837466005745
VASP	0.803614645256415	3.51078081159033	10.3054110021458	4.66827553521362e-22	2.83590913799995e-20	39.3655180781221
MRPL9	0.649956316290097	3.93688567024941	10.3045398622067	4.70124154156277e-22	2.83933122870663e-20	39.3585981043118
MCM2	1.06285590523803	2.38975405688179	10.3006842497013	4.84994645528962e-22	2.90681989148022e-20	39.3279745765272
NEIL3	0.47846247699822	0.716275540977179	10.3001999800527	4.86895130070811e-22	2.90681989148022e-20	39.3241286688144
CKS2	1.19974200279288	4.00647118768249	10.2980538357709	4.95406981525984e-22	2.92679886723987e-20	39.3070859034744
RNF34	0.40585434808789	2.21040189124725	10.2979364996375	4.95876588981727e-22	2.92679886723987e-20	39.3061541807122
DUSP12	0.539438056273872	2.46867441386325	10.2886247636233	5.34589757846021e-22	3.13746802514376e-20	39.232231741048
WDR62	0.397049193174716	0.927169744652074	10.2859174563017	5.46398507242054e-22	3.18875713102835e-20	39.2107463263188
EEF1E1	0.573017036809338	1.96010482780747	10.2806444133198	5.70147468276772e-22	3.30876642483749e-20	39.1689079533317
KDELR1	0.649400049362951	5.61798208376571	10.2795366641887	5.75265470204594e-22	3.31992094693629e-20	39.160120142157
ALDH2	-1.32278230836272	5.14045659391606	-10.288895280229	6.02387705000579e-22	3.45723949146188e-20	39.1188903715238
SLC25A6	0.931535149244396	5.96946432065752	10.256775702993	7.01439048891943e-22	4.00359826367555e-20	38.9656315459587
IKBKE	0.701425309218028	1.21132362640476	10.2453233205193	7.57926779252419e-22	4.30237343326455e-20	38.8889617531676
TMEM147	0.854518908437868	4.30206605950907	10.23652959682	8.13530174166131e-22	4.59290839632487e-20	38.8193476551144
SNRPD2	0.970615401113026	5.30897198802314	10.2357726827636	8.18501495410344e-22	4.59599650503927e-20	38.8133572130764
ZNF446	0.256590457040828	1.22132376343937	10.23408169472	8.29716994163605e-22	4.63392480396319e-20	38.7999751187731
GOLGA3	0.411838146426493	2.52605093175684	10.2330671846122	8.36518881298144e-22	4.64129050148243e-20	38.7919471043712
AP4M1	0.426535807280015	1.37006837781306	10.2321911514712	8.4243688588853e-22	4.64129050148243e-20	38.7850152395572
BAX	0.853639215295988	3.68959867088836	10.2318960699132	8.4443964649613e-22	4.64129050148243e-20	38.7826803956491
TIMM17B	0.610293558848634	3.57882751911708	10.2285268377394	8.67645175924137e-22	4.74373583552628e-20	38.7560238639482
ATP1B3	0.98924340588656	3.07267783162697	10.2261422401692	8.84450834285065e-22	4.8103011866771e-20	38.7371604575319
POLA2	0.485410118696311	1.66672350478736	10.222531756458	9.10513432163322e-22	4.92625704860031e-20	38.7086042946327
SLC39A1	0.820330827011071	4.80097164686767	10.2133551322278	9.80240440250204e-22	5.27602989291146e-20	38.6360493966799
NAP1L4	0.515500810392684	3.59802505271011	10.2107439485322	1.00103311571057e-21	5.36017113711413e-20	38.6154107056691
ESR1	-0.434869902396428	0.665103772038873	-10.2061280201726	1.03886686071862e-21	5.5342302303308e-20	38.5789337635438
RABIF	0.486307417734408	2.58804906341962	10.2048591744684	1.04951338881728e-21	5.5624209607316e-20	38.568908434683
TRAIP	0.524050685710086	0.961992893712544	10.1993561352324	1.09695636293102e-21	5.78435669955705e-20	38.5254361640966
AACS	0.351733150817696	1.32979796497624	10.198468561135	1.10480536783696e-21	5.79632230358098e-20	38.5184258302647
TPM3	0.759668283014183	4.02575254436739	10.1970523282814	1.11744510040284e-21	5.83317573014309e-20	38.5072406892522
E2F2	0.370275157060782	0.589019264154722	10.1963018667033	1.12420101373992e-21	5.83910006536513e-20	38.5013140349267
SUPT5H	0.512641955270804	3.39681431071435	10.1920298938103	1.16343888042289e-21	6.01283735812589e-20	38.4675814122803
ARF3	0.584948208217292	3.65710989310415	10.1892085522298	1.1900956480482e-21	6.12015524352706e-20	38.4453076703471
NRF1	0.35232436917006	1.57931930843544	10.1867279743402	1.21403347780877e-21	6.21250234851111e-20	38.4257270037157
POLA1	0.412380896334624	1.3906178700971	10.1742259639171	1.34215545256702e-21	6.83446609865989e-20	38.3270816886641
TOMM40	0.724848555836098	3.66583145903198	10.15088668179	1.61833050869719e-21	8.20059381675437e-20	38.1431074148913
SCNM1	0.630913310135587	2.82198761562642	10.1389412824905	1.78082072652382e-21	8.98017752773275e-20	38.0490380132457
KIF20A	0.784916023059702	1.65878779533402	10.1361813763723	1.82061009205063e-21	9.13647228802991e-20	38.0273127173345
SMOX	0.975013402834625	1.68938376142248	10.1280970828473	1.94231395420639e-21	9.70036411360383e-20	37.9636942455644
MPV17	0.521915934206922	2.2665886629331	10.1270181062661	1.9591569230653e-21	9.7376660845944e-20	37.955205509522
URM1	0.565263748358745	3.24105614825085	10.1230844854339	2.02179900441295e-21	1.00011657418294e-19	37.9242624540065
RBM10	0.420859612014095	3.49852640555743	10.1126453259732	2.19785193921603e-21	1.08205146656759e-19	37.8421775845248
CNOT6	0.466730309531533	1.73931222223137	10.1025786955199	2.38202047742826e-21	1.16719003393985e-19	37.7630670603341
MTMR2	0.492226262623524	1.41362727890404	10.0990803608334	2.44954685655155e-21	1.19464285191819e-19	37.7355851125237
TM6SF2	-1.30517656732514	1.83600690183534	-10.085235948239	2.73594480412177e-21	1.32808386099145e-19	37.6268798340633
GPR107	0.614571713457302	2.38279497937709	10.0832755152451	2.77910198628487e-21	1.34275867132685e-19	37.6114934565739
CAPN10	0.341367949836074	1.23227713253548	10.081331901233	2.82255625494944e-21	1.35744048038958e-19	37.5962407475629
NR1I2	-1.17454547442297	1.97630872659032	-10.0790251913753	2.87500485324956e-21	1.37629264587818e-19	37.5781407594587
ASXL1	0.505082192270058	2.48738505570368	10.0772094553189	2.91696984300369e-21	1.38997627197809e-19	37.5638949240838
GLA	0.758018354419814	3.08403141869071	10.075118068966	2.96605998349348e-21	1.40225900433401e-19	37.5474881969552
PRCC	0.614839918661123	3.689832124983	10.0749625188084	2.96974375195882e-21	1.40225900433401e-19	37.5462679975604
FANCG	0.565239637147652	1.77786831402121	10.0688945970973	3.11704692143389e-21	1.4586512576953e-19	37.4986770269229
SSR2	0.814010733536159	4.70784263956074	10.0688861784307	3.11725624959913e-21	1.4586512576953e-19	37.4986110102092
CHST12	0.243039674710288	0.98834217362192	10.0631725270414	3.26259369608817e-21	1.5198127047069e-19	37.4538134270074
LIG1	0.608716848663172	2.19222178582903	10.0613821267646	3.30950593645247e-21	1.53478337802983e-19	37.4397788456398
GTPBP4	0.475922684658151	2.51388145421246	10.0589679957444	3.37382349702665e-21	1.55765682164946e-19	37.4208572024616
CD2BP2	0.589433793136438	3.26343768324848	10.050995099648	3.59518736754599e-21	1.65251355637468e-19	37.3583849396749
UQCRH	0.787964131698274	5.37369661813448	10.0397154517205	3.93320697061163e-21	1.79991867888606e-19	37.2700502826362
CDC25C	0.636802036386344	1.1023946399235	10.0373153888278	4.00910474604477e-21	1.82660439043478e-19	37.2512618495177
FUBP1	0.648896029553975	2.47231844793075	10.0365754573515	4.03279578600856e-21	1.82937478712039e-19	37.2454699512665
DNTTIP2	0.361331721656549	2.60461692331858	10.0348582698087	4.08831357000917e-21	1.84236198744097e-19	37.2320294025889
ATP6V1F	0.766464332114405	5.54233692025248	10.034594861795	4.0968966028e-21	1.84236198744097e-19	37.2299678047891
RFWD3	0.470119362278399	1.54121356950399	10.0316223239004	4.19500465449839e-21	1.87834949788488e-19	37.2067049705237
HDDC2	0.472881268507413	1.72893395602255	10.0264555327723	4.37111704095699e-21	1.94880531422581e-19	37.1662794023133
RHOG	0.637185378932396	3.86851698540322	10.0208942895088	4.56888505635042e-21	2.02827256262257e-19	37.1227808119112
XPNPEP1	0.386085685378022	2.33483165102192	10.016949876711	4.71451720949933e-21	2.0840172243523e-19	37.0919369592478
DNMT3A	0.527494740087025	1.46614252667349	10.0149441073275	4.79033112256626e-21	2.1085576144584e-19	37.0762552303995
ABCC5	0.349691887536854	1.43855955124786	10.0141649091002	4.8201086277463e-21	2.11271259177336e-19	37.0701636979085
TARDBP	0.308850526730362	3.44042823553038	10.0016872953239	5.32277050601471e-21	2.32323277380171e-19	36.9726542843099
RALA	0.488107393208436	2.96640762688391	10.000192562732	5.38637445493182e-21	2.34115723170844e-19	36.9609779674449
NXT1	0.628705420508736	2.94591093301017	9.98652154195304	6.0042634298912e-21	2.59463233331066e-19	36.8542309942404
MAPKAPK5	0.272179646446187	1.25885525257197	9.98620222011452	6.01950704974845e-21	2.59463233331066e-19	36.8517386395978
TRAPPC4	0.465336341914429	2.59462664105626	9.97320460596926	6.67370335861878e-21	2.86472853261702e-19	36.7503289410946
CDC25A	0.508421028755694	0.998491874012418	9.96884559166302	6.90853909719093e-21	2.95332938854401e-19	36.7163360334047
RBM14	0.41885204378696	2.83934454022551	9.96657390610044	7.03415669581993e-21	2.99470572771219e-19	36.6986241122774
MCM7	0.99292615087947	3.59348490386507	9.96551602033307	7.093426152691e-21	3.00761268874098e-19	36.690376756281
HDAC2	0.351042302957251	2.146811232446	9.95803785122087	7.52678212684259e-21	3.17838263144881e-19	36.6320906807886
PCK2	-1.57042593574378	5.40452182558418	-10.0027542665361	8.04683245585108e-21	3.38423058912474e-19	36.5827323376946
SHCBP1	0.53221689637552	0.915204808743883	9.94515980689185	8.33553406612897e-21	3.49151322092531e-19	36.5317758300177
ILF2	0.762210694995664	5.1226330582625	9.94440965640606	8.38521759525526e-21	3.49821848913702e-19	36.5259347488734
SLC27A2	-1.65961655576892	4.50827597773853	-9.9968087843227	8.83494230639666e-21	3.66129841889638e-19	36.4926701025426
CEP250	0.356262788603307	1.24593093409946	9.93717338193794	8.87984293401171e-21	3.66129841889638e-19	36.4696021441651
CSNK2A1	0.581812611780953	2.90466699121966	9.93714475659468	8.88185600271359e-21	3.66129841889638e-19	36.4693793496778
CCT2	0.626589072548003	3.92310830437855	9.93087395345631	9.33395004191435e-21	3.83245347966033e-19	36.4205818163233
CD63	0.829193825120183	6.8518224722912	9.92254544289673	9.96989844581769e-21	4.07745295492733e-19	36.355799171339
TTK	0.559986024439965	1.25585418662791	9.91867094790585	1.02802309462196e-20	4.18788388507172e-19	36.3256723746027
FLOT1	0.713193636759457	4.98908691383741	9.91536311933651	1.05527519388233e-20	4.28061667831379e-19	36.2999571446477
SCAMP3	0.786984140012438	4.79173861247821	9.91491424233283	1.05902819245923e-20	4.28061667831379e-19	36.2964679319331
NAT10	0.409410070600754	2.68892591321369	9.9106827032885	1.0950652318598e-20	4.40912311184481e-19	36.2635797820148
UBAP2L	0.70687271971865	3.41534062609054	9.90408319104787	1.15371329914921e-20	4.62732577280386e-19	36.21230352845
EHMT2	0.644545746314111	2.65503286114844	9.9023072094017	1.17002159574098e-20	4.66499345195863e-19	36.1985080376485
ATP13A2	0.625365205742158	1.81988885889985	9.90208411247428	1.172086340933e-20	4.66499345195863e-19	36.1967751635428
CACYBP	0.680815510171314	3.25245111105221	9.90152093685146	1.17731459487261e-20	4.66791756165521e-19	36.1924008759358
ARPC4	0.634397990775732	4.02130140640622	9.89727050277877	1.21752759812434e-20	4.80900254346603e-19	36.1593916062842
YEATS2	0.416052158939214	1.40350668187392	9.8891898360535	1.2977758091662e-20	5.10655117637063e-19	36.0966589342459
GRK6	0.536725916882479	2.45910268603112	9.87946253831759	1.40136880884592e-20	5.49336573067601e-19	36.0211822019025
ST6GALNAC4	0.79366746314285	1.48685794572855	9.87832470832567	1.41401042221883e-20	5.52208280677038e-19	36.0123562745449
SNHG3	0.837662108953811	1.4251899882452	9.86928981365069	1.51849278161688e-20	5.90790375109969e-19	35.9422952041567
ARPC5L	0.506386433360453	3.0673721957877	9.85962402968	1.63876646337648e-20	6.35205448565479e-19	35.8673829756418
ZSWIM1	0.411403405571484	1.73133354805801	9.85503944109304	1.69907451932897e-20	6.5613331252005e-19	35.8318661376082
FDX1	-0.582871335355853	3.41730995572769	-9.85040494059525	1.7622782192807e-20	6.78020227477329e-19	35.7959723616539
RAB35	0.516932032123643	2.62440769826749	9.84668720522557	1.81466204043291e-20	6.95598128266313e-19	35.7671859226945
UPB1	-1.37535924334665	3.95918743425254	-9.91497924976326	1.95358141784145e-20	7.43362775404285e-19	35.7192476835468
ECT2	0.7023123210607	1.67640591837732	9.83846652437864	1.93604525346916e-20	7.39398459302854e-19	35.7035555449512
PANK2	0.272140594354348	2.03774268453428	9.83639491227747	1.96788442903211e-20	7.46072388641807e-19	35.6875255525061
PNKP	0.504264761957679	2.52102098151466	9.83229989489962	2.03235902182964e-20	7.67714382500592e-19	35.655844357195
ARPC2	0.522197557896257	3.82655697843496	9.83177431086064	2.04078455927858e-20	7.68103985571951e-19	35.651778719242
GMEB1	0.287806530905295	1.34620483375388	9.8261170015901	2.13370048884908e-20	8.00176197767662e-19	35.6080247878872
GMIP	0.590890132546934	1.51610302426936	9.82149444256113	2.21272973236636e-20	8.26828649633875e-19	35.5722845409861
TTLL4	0.741782957969339	1.69187892912003	9.8081792588566	2.45698076159454e-20	9.14807030517707e-19	35.4693902228148
NUSAP1	0.975130841303073	2.63056150454376	9.7924664880575	2.77983005252449e-20	1.03131694948659e-18	35.3480729884418
E2F4	0.563072626629408	2.87245229328385	9.78644331757811	2.91445992915508e-20	1.07741671687057e-18	35.3015985958967
RSL1D1	0.505498167432563	3.58105860314976	9.78504175073099	2.94670455739928e-20	1.08547400504481e-18	35.2907865922745
KIF23	0.555001701894778	1.00954098579683	9.7759788706171	3.16392520376754e-20	1.16069467394295e-18	35.2208953334297
TYMS	1.05133857139801	2.51588055439043	9.77560375433647	3.17325074508854e-20	1.16069467394295e-18	35.2180033219619
GYG1	0.501126450521778	2.47196822654247	9.7598848118582	3.58955390197576e-20	1.30836090995523e-18	35.0968743251478
PTDSS2	0.52607344928219	2.01970629073038	9.74295432706278	4.09871678909513e-20	1.48872272745175e-18	34.9665370798978
CFHR4	-1.58062143731226	2.54735540131345	-9.74116964834202	4.15639780118363e-20	1.50441325291622e-18	34.9528056878241
CLSTN1	1.0097513592069	2.81901581092202	9.73912351310625	4.22352103282552e-20	1.52340057253443e-18	34.9370644560578
RPN2	0.599451110253024	6.39971588652201	9.73784009169116	4.26617143840815e-20	1.53345982360498e-18	34.9271918896846
SNRPB2	0.505600738335461	3.54146709091434	9.72981625377794	4.5426780661594e-20	1.6242312425057e-18	34.8654868041172
MED8	0.492622806784048	3.52570310244161	9.72961116392335	4.54997392731188e-20	1.6242312425057e-18	34.8639100097165
HMGB2	0.950985475973238	3.47751336418085	9.71992203850921	4.90823631339162e-20	1.74612187751754e-18	34.7894392898267
CCT3	0.769033791836553	5.74322775315229	9.71514845462706	5.09490045117674e-20	1.80634218043768e-18	34.752765532006
ACD	0.445094194044031	2.02351232166877	9.7145097095832	5.12040627169976e-20	1.80921021600058e-18	34.7478590843287
POU2F1	0.236521296182455	1.41022942541016	9.70509145832073	5.51153448872821e-20	1.94080746674266e-18	34.6755359202622
FMO4	-1.02828474785788	2.65435546137004	-9.70167835159603	5.66047859526689e-20	1.98652201512272e-18	34.6493367338184
MCM10	0.459966245614451	0.794861560427441	9.6931246460203	6.05153407132145e-20	2.11661063747095e-18	34.5837019300803
SUMO2	0.547061683073862	4.33948708308618	9.68860908948707	6.26866919650364e-20	2.18519918165369e-18	34.5490666774737
ACADL	-0.802676990624576	1.30743673872938	-9.68812741192361	6.29228267757037e-20	2.18609473092311e-18	34.5453726735844
RAD54L	0.490167039149917	0.860642340321013	9.68148550187363	6.62703619879652e-20	2.28979726285783e-18	34.4944466746556
POLR3F	0.360467562364848	1.68618843961072	9.68133433378386	6.63485729803817e-20	2.28979726285783e-18	34.4932878528661
PRC1	0.724327540968158	1.98538956177997	9.67799514690861	6.80997445235143e-20	2.34245081493466e-18	34.4676930990042
RUSC1	0.54416863302028	2.25829845434332	9.67105450012402	7.18877229896633e-20	2.46458635781064e-18	34.4145099896197
EFNA3	0.582391629145452	1.24360142430239	9.6690154398362	7.30397964401196e-20	2.49584672835514e-18	34.3988898632529
POLR3C	0.565016337400178	2.59434701052019	9.66298715874491	7.65540355250542e-20	2.60735515093201e-18	34.3527219042157
SF3A3	0.473538457352832	3.22714798167962	9.65609987934428	8.07747747208972e-20	2.74211882287804e-18	34.2999961358299
SNRPG	0.508497183219109	3.79433547769283	9.65041681126399	8.44308106214258e-20	2.8568966147732e-18	34.256506028634
YWHAB	0.519909723905342	4.79516658863436	9.64440343585327	8.84782336922742e-20	2.9841295181667e-18	34.2105047627537
UTP6	0.352303457855639	2.56262304338288	9.64348930474169	8.91101405579054e-20	2.99571566380428e-18	34.2035133107199
NFE2L3	0.72815082304126	1.14807306498373	9.64034302083002	9.13194834691903e-20	3.06008643315467e-18	34.1794529294737
TUBB	0.964766072586116	6.41130898446664	9.63842550439489	9.38104117436017e-20	3.13344873695349e-18	34.1538151105278
PHC2	0.612559420608217	3.88152447975764	9.62040921401894	1.06636278209685e-19	3.55044121167375e-18	34.0271228422875
KIF18A	0.422738650967429	0.641161480129043	9.61068213770099	1.15010172705288e-19	3.81701493310712e-18	33.9528586483042
IFNGR2	0.789742442998624	3.51450878232597	9.60811265562917	1.17329083136863e-19	3.88157489052781e-18	33.9332486645206
NOL10	0.417759500617452	2.43878756160847	9.60596263195995	1.19305046612097e-19	3.93441531494114e-18	33.9168423400204
DNASE1L3	-1.10125964176738	1.63327415267061	-9.60363122238491	1.21485038895064e-19	3.99060602577301e-18	33.8990543768178
TLK2	0.278242945222396	1.70663099112358	9.60332187074228	1.21777253578171e-19	3.99060602577301e-18	33.8966943091085
GLTP	0.522592269459345	2.74614958207483	9.60048797063164	1.24486833019288e-19	4.06656987863006e-18	33.8750763758009
BRAP	0.300040975302444	1.94738131434914	9.5936608784106	1.31262557291211e-19	4.27446848006613e-18	33.8230126809675
SMS	0.658289092278913	3.7769928192607	9.59249369095042	1.32457045963485e-19	4.29988685458964e-18	33.8141138732902
CASP2	0.514619997783774	1.33603674293539	9.58929934839414	1.35781536781281e-19	4.39407664823659e-18	33.7897630458926
TIPIN	0.370803308113544	1.26682300927867	9.58589646718475	1.39414166059007e-19	4.4976222267732e-18	33.7638278357798
UBE2D2	0.423767135164518	3.63491365586413	9.58088963694196	1.44935035316289e-19	4.66125432466133e-18	33.7256780608217
NUP188	0.533747251390958	1.84181517039111	9.57117290879293	1.56275693302027e-19	5.01046883339955e-18	33.6516750228439
CBFA2T2	0.410401997268511	1.48125844104932	9.57077256117308	1.56761375595897e-19	5.01057590673902e-18	33.6486269213547
HDAC11	0.678115906111796	1.97489874764554	9.56992154819187	1.57798763966218e-19	5.02826245423642e-18	33.6421478709434
LSM2	0.792213745122829	4.05117819002877	9.56644076653319	1.62113227719872e-19	5.14994559496645e-18	33.6156510912184
BUB3	0.393005380000414	2.80505605532768	9.56357676082103	1.65750801680706e-19	5.24944917030236e-18	33.593853729386
UBE2L3	0.492902125170619	3.62903428276803	9.56226611213193	1.67442354002731e-19	5.28690326255432e-18	33.5838799544621
NCBP2	0.507456693125214	2.84455203914815	9.55494408976278	1.77212282035235e-19	5.57842783570311e-18	33.5281759016245
GAPDH	0.930481761244482	8.43902442954049	9.55025470087232	1.85911697115878e-19	5.8345942889418e-18	33.4816991109184
CAT	-1.15597741989897	5.6648557642943	-9.57071994540853	1.88037890468242e-19	5.88354700657862e-18	33.479070776679
PHF21A	0.336516958099969	1.62731879898423	9.54259039965276	1.94994332296365e-19	6.08288625794187e-18	33.4342502585852
CFL1	0.600498152330897	5.78551091108668	9.53993852508827	1.99036370264162e-19	6.19038866558117e-18	33.4140974531505
GRB2	0.519512080267387	4.19113493286236	9.53730095353191	2.03139044010284e-19	6.29912951993681e-18	33.3940566807745
BDH1	-1.26694002774736	3.35001098055558	-9.54395933244007	2.04564677805669e-19	6.32445795549194e-18	33.3901961314941
ILKAP	0.32440958740127	2.26493590446396	9.53513537049986	2.06570187195575e-19	6.36751069610575e-18	33.3776046569745
FBXO46	0.557034599825496	2.30129658523996	9.52268387151524	2.27443616145753e-19	6.99019019089374e-18	33.2830537059748
ZNF580	0.521727916586874	2.14025203099689	9.52172577910851	2.2913384275182e-19	7.02136388939796e-18	33.2757814735776
TK1	1.48300662812645	3.18529931111819	9.52249308474593	2.30414306365092e-19	7.03983474858992e-18	33.2711366111144
FAM53B	0.440001548910427	1.69721790091195	9.51842535923266	2.35052266041847e-19	7.16047782886425e-18	33.2507335878787
COG2	0.344039096219389	1.78725118830642	9.51240489790714	2.46241635635709e-19	7.47940968123902e-18	33.2050559566848
ILF3	0.591402836541754	3.29047779759663	9.50051584786346	2.69913181201476e-19	8.17451348781613e-18	33.1149041377083
GRHPR	-0.9980656717116	4.46512098518425	-9.49823017086298	2.74716253035335e-19	8.29579196666006e-18	33.0975801914076
PGS1	0.360624954841296	1.87366951878062	9.49195337892787	2.88346676345669e-19	8.68216021414148e-18	33.0500191317375
DAO	-1.75408786478053	2.60005720673485	-9.50093264509619	3.0596091313389e-19	9.18590163478279e-18	32.998531317087
MARCKSL1	1.48507084471346	4.20858531225282	9.483586434825	3.21943425304818e-19	9.63789136042204e-18	32.9451349843353
DNAJC7	0.361523544722151	2.51137601391906	9.46713678405049	3.49127267614224e-19	1.04216495861395e-17	32.8621628078424
PTBP1	0.493540219636956	4.35400162376122	9.45872030535335	3.72500856308261e-19	1.10875039980808e-17	32.7985194778212
MKKS	0.56373503984112	2.96491544330472	9.45086781900802	3.95705033954233e-19	1.17445254077616e-17	32.7391718659963
TYRO3	0.564139242506135	0.900824526219928	9.44909347491934	4.01143671689503e-19	1.18720241068677e-17	32.7257658494847
AATF	0.491415332456952	3.2119113623528	9.44381436520049	4.17767279099913e-19	1.23288820888917e-17	32.685888691178
MRPL17	0.573765972217845	3.50510744656531	9.4306087540542	4.62403718684939e-19	1.36075065997143e-17	32.5861958907146
XRCC2	0.306623345950498	0.970449218755535	9.42491877872676	4.83065533670708e-19	1.41753806886195e-17	32.5432668455565
PBK	0.745680100602663	1.65951550881655	9.42219557951027	4.93275644668445e-19	1.44280554552803e-17	32.5227267558944
GPD2	0.490995617495463	1.14873286867995	9.42188490907949	4.94453960539062e-19	1.44280554552803e-17	32.5203837127264
KPNB1	0.615773467457335	3.74193183022126	9.42065879320223	4.9913170642051e-19	1.45237539672164e-17	32.5111369369532
SNRPE	0.738822481477582	4.65050782335851	9.41990173725921	5.02041834358504e-19	1.45676273053523e-17	32.5054279512461
CNOT2	0.278754915913385	1.84034757630792	9.41750298780527	5.11374234259568e-19	1.47970906559565e-17	32.4873407414442
EHHADH	-1.55506775830033	4.30371128405517	-9.45448321400902	5.31479688439771e-19	1.53361416764232e-17	32.4666723215419
SEC14L2	-1.99570878334911	3.16313348540133	-9.46821732784457	5.46281880857039e-19	1.563299222684e-17	32.4464015732884
GNPDA1	0.642050172788666	2.60598245809698	9.4100871518258	5.41327717258633e-19	1.55770424567387e-17	32.4314411103796
AR	-1.21325389040284	1.89890479002574	-9.40917204628357	5.45142523708551e-19	1.563299222684e-17	32.4245450208315
SMG5	0.820846833048773	4.08513165307872	9.4042888258965	5.65954510461426e-19	1.61514710293222e-17	32.3877527626735
FUS	0.669934388573322	3.4166213800884	9.40116325024914	5.79687165596545e-19	1.64980555512792e-17	32.3642094610894
DHRS1	-0.850336017517503	3.10507007406696	-9.40043481023009	5.82934858603203e-19	1.65451565878964e-17	32.3587231952484
E2F3	0.527563051458496	1.78330455897446	9.39794592208882	5.94168133012964e-19	1.681803423907e-17	32.3399800237315
GTSE1	0.565958183536987	1.12801033672534	9.39617287384534	6.02301245776188e-19	1.70019166878343e-17	32.3266295044893
BLM	0.325982224178202	1.04928953569891	9.38390901773301	6.61660764241001e-19	1.86269160404757e-17	32.2343284854291
SF3A2	0.74541649348628	3.52034804195162	9.37932997066732	6.85281709419241e-19	1.92053042733914e-17	32.1998842580358
FANCE	0.514524841025765	1.16517302162705	9.37921151622101	6.85903724049692e-19	1.92053042733914e-17	32.1989933636578
HELLS	0.405931859539143	1.09922414058043	9.3768994898724	6.98157114152789e-19	1.9495849736073e-17	32.1816060210007
EWSR1	0.448950987971541	3.47169928237081	9.37571077320679	7.04541383128405e-19	1.96213830775814e-17	32.1726674272748
NASP	0.613287732025238	2.70852563906701	9.37464486946027	7.1031527288796e-19	1.97292915902677e-17	32.1646529188613
DSN1	0.664933076135028	2.41497468638759	9.37384131341179	7.14699053108443e-19	1.97981167031747e-17	32.158611365995
ZNF764	0.37580873348603	1.63093005718045	9.36971516205867	7.37635308721299e-19	2.03791371994597e-17	32.1275938035394
CYP4F2	-1.73787882136912	3.94347813500662	-9.46420166864757	7.71077443784575e-19	2.1134439277135e-17	32.1234905723912
MXD3	0.482914588848634	1.44803582928854	9.3674411199898	7.50586625458299e-19	2.06819465922037e-17	32.1105026957882
ANXA10	-1.44321248839129	1.9434695259195	-9.36709114086792	7.52599780597442e-19	2.06825569334556e-17	32.1078725694397
CENPI	0.339707161052919	0.663910629451363	9.36223164508525	7.81112307112838e-19	2.13531438060215e-17	32.0713592169819
IMPDH1	0.907237623480509	1.67427003224432	9.35992840745052	7.94997949395211e-19	2.16311720976022e-17	32.0540571703794
PITX1	0.952293682455817	0.729474591905348	9.35985452213457	7.95447414447828e-19	2.16311720976022e-17	32.0535021830458
RBM17	0.502698197377438	2.56482962165164	9.35339937532791	8.3570439307217e-19	2.26665724157538e-17	32.0050249090199
ACTR8	0.320871217083571	1.80285290865669	9.34723737322562	8.76015875408905e-19	2.36980544628846e-17	31.9587682490722
ITPA	0.691074147118047	3.79857409242284	9.34447929435727	8.946781731251e-19	2.41400437985027e-17	31.9380700783275
SLC10A3	0.702942635078813	2.25927112992041	9.34160754773627	9.14528602366196e-19	2.46117179310364e-17	31.9165228660239
SAC3D1	0.637638904018504	2.87032200966411	9.33427582045337	9.67210792642201e-19	2.59622369869953e-17	31.8615300975269
PCNA	0.895389832857843	4.76856941363465	9.33102181811645	9.91546319211003e-19	2.65468638246492e-17	31.8371314451106
TMED3	0.646429857568201	1.51023014669513	9.33019757856082	9.9780628259955e-19	2.66457883384168e-17	31.8309520908419
NVL	0.368832514385912	1.85401846768442	9.32727383492189	1.0203293501192e-18	2.71457988384279e-17	31.8090353843078
ASB1	0.38525395192551	1.43018816721844	9.32709072704459	1.02175657930548e-18	2.71457988384279e-17	31.8076629279194
FOXM1	0.881152458039489	1.74023734391291	9.32392617311003	1.04673769955954e-18	2.77385490383279e-17	31.7839461284349
SUPT7L	0.391585170666354	2.37409704252952	9.31997981664023	1.07874045766224e-18	2.85138826315405e-17	31.7543770359935
LMNB1	1.02231894541016	2.21675370860463	9.31605180183296	1.11155765456867e-18	2.93067535930439e-17	31.7249530251485
PLCB3	0.460030220925425	1.98522146922522	9.31458266649459	1.12408450802302e-18	2.95619996692232e-17	31.713949974636
REXO4	0.555486382131059	2.98195519441647	9.31284490380469	1.13908268569982e-18	2.98807851996205e-17	31.7009364264369
HCG18	0.32382692503265	0.917743244965329	9.30771568383546	1.18451862886239e-18	3.09944068428779e-17	31.662534065405
CDKN3	0.83308470346152	2.17548746010665	9.3005913053477	1.25062381656874e-18	3.26419100666233e-17	31.6092156338747
EIF2B5	0.335881373878315	2.73607398417758	9.29356706553767	1.31937850415856e-18	3.43501350907247e-17	31.5566712923201
NCDN	0.544377323697844	1.70738268485304	9.28095860677004	1.45232391730141e-18	3.77168521323175e-17	31.4624160845479
RPP30	0.320077128885622	2.169869830203	9.274883849035	1.52103632198886e-18	3.94028062663847e-17	31.4170321414597
CKLF	0.586920773006288	2.31483499862868	9.27140621494817	1.56181307163669e-18	4.03584930053779e-17	31.3910593374658
SET	0.618546685266955	4.57156072007633	9.261451878064	1.68462040047742e-18	4.34239124569714e-17	31.3167484336648
G6PC3	0.571551443689151	2.27128136438998	9.25734355549019	1.73805337378973e-18	4.46450628214114e-17	31.2860934856474
AKAP8L	0.465708170737968	2.5612171130385	9.25715163657129	1.74059014657986e-18	4.46450628214114e-17	31.2846616560262
SRC	1.02711426365056	1.85863773695391	9.25435930168351	1.77791700773047e-18	4.54224244973628e-17	31.2638312532808
RFXANK	0.661673242678752	3.13605929474733	9.25423162784881	1.77964254624824e-18	4.54224244973628e-17	31.2628789185989
REEP4	0.689984880923498	2.3485933305146	9.2507953707847	1.82671315664874e-18	4.65095496844781e-17	31.2372505187864
CYB5A	-1.21531842062996	4.53506789535473	-9.25396687694778	1.87959357495215e-18	4.77389194537969e-17	31.2124087964357
ZNF335	0.334067100457615	1.65254449379904	9.24456448742298	1.91523491628746e-18	4.85255129521809e-17	31.1907942082961
UBE2O	0.424883122331076	2.144988487566	9.23906950363769	1.99682296433281e-18	5.03501554850379e-17	31.1498407487946
NOL7	0.545311424015832	4.10808010359075	9.23906145618606	1.99694494222522e-18	5.03501554850379e-17	31.1497807831823
ZNF480	0.438063024489578	1.34712938564345	9.23321373009209	2.08756251251346e-18	5.25075045520335e-17	31.1062150098255
CENPJ	0.350791627061794	0.895166740689708	9.22361247035531	2.24526765232195e-18	5.63377786771025e-17	31.0347224542299
TRAF5	0.349603482245259	1.31843226394196	9.22204471337848	2.27211738625362e-18	5.68741094178376e-17	31.0230530713846
FBL	0.914071816152719	4.77783882708724	9.22142737892231	2.28277711718175e-18	5.7003578589625e-17	31.0184583661068
POLR3K	0.482699211055235	2.31655130264565	9.21731449512735	2.35507221286229e-18	5.86678420796485e-17	30.9878518237949
TFAP4	0.272986684496791	1.18230536684082	9.21144625810331	2.46216823273431e-18	6.11890038316843e-17	30.9441973144715
DYNLRB1	0.649117806061996	4.55336683103554	9.20904229197748	2.50742234700066e-18	6.21649244406752e-17	30.9263189251562
THOC5	0.376461750095855	1.81672365373702	9.20362482493353	2.61245011103395e-18	6.46145994129064e-17	30.8860396715523
VPS37C	0.381095617447236	2.20724834236098	9.20054795628932	2.67403078394813e-18	6.58594501038254e-17	30.8631695120071
TRPC4AP	0.462313913519349	4.15153428669424	9.20047733777105	2.67546091103334e-18	6.58594501038254e-17	30.8626446652346
ANP32B	0.695665556762253	5.05744802782311	9.19934051163703	2.69858790881156e-18	6.62717049568192e-17	30.8541959590162
CCT6A	0.640085619365629	4.59226210327466	9.19884385128295	2.70875380697366e-18	6.63391975211384e-17	30.8505050646932
MARCKS	1.24884197716541	3.48698246802298	9.19858298807989	2.71410848541431e-18	6.63391975211384e-17	30.8485665290616
GEMIN7	0.608164077741217	2.49483576778784	9.19809646511394	2.72412327963541e-18	6.63719548424725e-17	30.8449511544163
PDCD2	0.416924848352697	2.12816185967865	9.19789760425461	2.72822725430649e-18	6.63719548424725e-17	30.8434734445157
BCAS4	0.330024924561096	0.714804583783811	9.19527484673928	2.78293113405896e-18	6.74914035912141e-17	30.8239859296766
XRCC1	0.517426339870468	2.62237540974375	9.19480234008863	2.79290134405291e-18	6.74914035912141e-17	30.8204754969872
ADNP	0.549584493849878	2.83812754060145	9.19476297856252	2.79373349482307e-18	6.74914035912141e-17	30.820183070228
GGA3	0.423976323265314	2.01405410081047	9.1910269664148	2.87384646572647e-18	6.92228218474639e-17	30.7924308443165
PSMD14	0.381987988357267	2.8922550494508	9.19080252465578	2.87873113574359e-18	6.92228218474639e-17	30.7907638473133
SUV39H2	0.430669091809348	1.13175992064011	9.18737335330939	2.95439404363455e-18	7.07990029277973e-17	30.7652975120993
CCDC6	0.459994785786037	2.048767394311	9.18721613624026	2.95790982582441e-18	7.07990029277973e-17	30.7641301003872
BLVRA	1.15391911336399	2.79245119807994	9.17638292909896	3.21042671616317e-18	7.66664660402369e-17	30.6837184297358
NT5DC2	1.05779127910745	1.91111584766737	9.17341571467682	3.28324343917719e-18	7.82255340508548e-17	30.6617040257932
CENPB	0.562400470006177	4.31370341225871	9.17267059613142	3.30178467768006e-18	7.84872751298409e-17	30.6561765298758
DPM2	0.676217358171835	3.2666668308855	9.17087251269448	3.34695601101359e-18	7.93794042064136e-17	30.6428390049239
PTMA	0.645402388977929	6.09210208785665	9.16683559949434	3.45061476854455e-18	8.16514492383617e-17	30.6129006187792
SMUG1	0.424640896348361	2.31993334302052	9.16596433693356	3.47340094666891e-18	8.20038387136288e-17	30.6064402800845
EED	0.272066916847359	1.50872885664883	9.16155327632861	3.59107281432134e-18	8.45897151817916e-17	30.5737385351922
ZNF174	0.306812728055761	1.60394574968292	9.16057086721731	3.61781340008923e-18	8.50268000002872e-17	30.5664567097772
PLEKHB2	0.616939000331967	2.35276223577757	9.15960683708005	3.64424556873244e-18	8.54546793859878e-17	30.5593115885707
SLC6A8	1.33119903728796	1.48858207664936	9.15920913128873	3.65520571946709e-18	8.55186419230273e-17	30.5563640419109
SOAT1	0.549092568424884	2.2148364070508	9.15867892389407	3.66986823800748e-18	8.56687443964532e-17	30.552434600871
PLK4	0.347469189331746	0.777244430742503	9.15765565030524	3.69833119135386e-18	8.61396063134167e-17	30.5448513802276
GYS1	0.518802698593154	2.02165139837081	9.15493004533208	3.77521757495873e-18	8.77336916525085e-17	30.5246552038789
ANP32A	0.436912851222034	3.36863831383237	9.15218328208955	3.85430347031842e-18	8.93396508768287e-17	30.5043060600147
CCT4	0.591543826648113	4.78034672752135	9.15193531896628	3.86152322330536e-18	8.93396508768287e-17	30.502469236253
ANKZF1	0.380136822089485	2.3626332561174	9.15002079608626	3.91772008594679e-18	9.04383916729227e-17	30.4882881731221
SNX5	0.42430159339555	2.92847104981307	9.1486196564535	3.95936064356429e-18	9.11969808544254e-17	30.4779109698944
SNF8	0.488234845500854	3.34877820992345	9.14017892582993	4.21965586187079e-18	9.69774006484819e-17	30.4154178199745
CKS1B	0.619293949356194	3.16414989105953	9.13928478432112	4.248203823484e-18	9.74179720051916e-17	30.4087999301621
MAP1S	0.510215543366828	2.21276235166983	9.13755101422669	4.30410585278192e-18	9.84824925081468e-17	30.3959687797845
RBM19	0.382552751750519	2.12935655370982	9.13612152425315	4.35074488849972e-18	9.93308525312859e-17	30.3853906713287
TRMU	0.417569544454444	1.69775814882768	9.13150154646392	4.50493026379505e-18	1.02625472763822e-16	30.3512103215295
FOXK2	0.401091736170556	2.06237413875842	9.12615741433044	4.69004901856033e-18	1.06608816640711e-16	30.3116859505174
STRN4	0.490539337455561	2.62557380909823	9.12399885864884	4.76694063365171e-18	1.08120042144921e-16	30.2957257307585
ADA	0.513375497625111	1.60313604060479	9.12094358596943	4.87791515572379e-18	1.10396040604921e-16	30.2731393013442
PSRC1	0.532896616212179	1.43238028511594	9.11744934830207	5.00797547999271e-18	1.13093150622096e-16	30.2473136078085
PRPF6	0.584193383959916	4.76298168364235	9.11516622686807	5.09480692638133e-18	1.14804456293382e-16	30.230442561585
MYCBP	0.426123315476798	1.9603741520096	9.11200961725648	5.21732139901551e-18	1.17310681153621e-16	30.2071212840571
CCDC59	0.306150453444474	2.27349878455099	9.09792680348224	5.80045080379829e-18	1.30140567926256e-16	30.1031383344405
RAC1	0.552081309784717	5.3670605019089	9.09652103004019	5.86209134971297e-18	1.31240096855212e-16	30.0927641204666
LBR	0.677818322238455	3.59442283396228	9.09584954583133	5.89176335161311e-18	1.31620726229155e-16	30.0878091118869
SCMH1	0.503172411839952	1.9734399481894	9.09232607489365	6.04991771673716e-18	1.3486383099027e-16	30.0618125360794
SLC2A1	0.784152748008231	1.22456159907515	9.0884377930635	6.22933359604091e-18	1.38565990140627e-16	30.0331317174243
DYNLL1	0.592243775785009	4.88677487221926	9.08517709466007	6.38384881116827e-18	1.41699618483795e-16	30.0090860593564
LHFPL2	0.493773119614152	1.50553268226964	9.08438384347376	6.42200952763081e-18	1.42242718492599e-16	30.0032371402153
NUP155	0.398839838826845	1.75028382352215	9.08200433170032	6.53784144951567e-18	1.44500206335253e-16	29.9856940996846
PFDN1	0.488946992376129	3.25754560838874	9.07815739652465	6.72950052822527e-18	1.48420491480263e-16	29.9573385631278
RPS8	0.84255458137183	7.01267825527983	9.07779616458571	6.74778099848963e-18	1.48508366551505e-16	29.9546763331058
MTHFD1	-1.08634196793561	3.67631438405416	-9.07718437724673	6.77885337028621e-18	1.48876805096265e-16	29.9501676966682
ANAPC1	0.187831641187336	1.33260044984557	9.07002861113324	7.15299100377838e-18	1.56762174150316e-16	29.8974467217539
NUTF2	0.573649867488735	3.58702207661325	9.06834282031686	7.24406892050721e-18	1.5842397462364e-16	29.885030278584
AKAP8	0.360466997540599	2.33678858337208	9.06756411753677	7.28652688050935e-18	1.5901773368641e-16	29.8792953510602
FHL3	0.750055101917722	2.21678444685299	9.06293898983029	7.54383756851098e-18	1.64041553094032e-16	29.8452390024345
NACA	0.503366356058326	5.0948704022879	9.06275213390587	7.55442008118471e-18	1.64041553094032e-16	29.8438633513207
NFKBIE	0.848177693130144	2.54762944669415	9.06258138592932	7.56410318945335e-18	1.64041553094032e-16	29.8426063041446
PWP1	0.383057656212131	3.3885768207162	9.06025220213748	7.69742583454918e-18	1.66585124102702e-16	29.8254603417763
KNTC1	0.43710513721838	1.29407118714093	9.05860812434485	7.7929323641847e-18	1.68301416630251e-16	29.8133593711058
DVL2	0.506891491002738	1.9397334056999	9.05630586076615	7.92865029005301e-18	1.70691373336162e-16	29.7964162658681
PAK4	0.58117620495761	2.39673420828578	9.05617459226024	7.93645873328517e-18	1.70691373336162e-16	29.795450300468
PDCD6	0.385820209303013	2.6230239258257	9.05015237378991	8.30300147765132e-18	1.78205742458351e-16	29.7511441432982
PSMC3IP	0.297442470220954	1.11981909270978	9.04921693364056	8.36142293096209e-18	1.79089611148112e-16	29.7442636772107
MSH2	0.539205889705608	1.99712292698937	9.04711945483982	8.49390249456822e-18	1.81552796529989e-16	29.7288376775337
MYO1B	-0.90275160743985	3.76620724381002	-9.04578189060986	8.57946879605963e-18	1.83005178343876e-16	29.7190016861885
ADHFE1	-1.10958575642047	2.25596410608658	-9.04315899744504	8.74974720715267e-18	1.86254864729307e-16	29.6997165002542
SOX4	1.16890932973723	2.02262690223838	9.04089796507629	8.89921844686079e-18	1.8904924586092e-16	29.683094791804
GBA3	-2.10238170173362	1.80121548359372	-9.08970196149012	9.17437918287775e-18	1.94496838677008e-16	29.6793434226249
NAT9	0.532649942112467	2.56688452970083	9.03553227458658	9.26413414934555e-18	1.95999644691246e-16	29.6436601125349
HSPA14	0.351235826957982	2.00870767618229	9.03484063689945	9.31223784473118e-18	1.96616924250137e-16	29.6385780616548
ETV5	0.617981550905313	1.5657392754348	9.03356750344849	9.40143283047662e-18	1.98097533961442e-16	29.629223911807
NUP93	0.321512449682622	1.57244907057252	9.02914572781752	9.71784644361091e-18	2.04350179870911e-16	29.5967421032667
BRD9	0.338569447877279	1.77540789841766	9.02856235727003	9.76037156567678e-18	2.04829777422728e-16	29.5924574903475
AURKA	0.819621862620298	2.387824666963	9.02570142589818	9.97160516155017e-18	2.0884079519795e-16	29.5714476899345
CBX2	0.542232549241009	0.717353952889988	9.02434608874133	1.00732500762217e-17	2.10545114269197e-16	29.5614959868514
SAMD4B	0.503598936804681	2.5842584416675	9.01267658877759	1.09919822594697e-17	2.29286569701549e-16	29.4758507747507
DBF4	0.342057181073786	1.42460395188964	9.0093717638366	1.12669325056671e-17	2.34550891520781e-16	29.4516086899333
DENND4B	0.455778379896715	2.44469756977158	9.00908495583529	1.12911128763004e-17	2.34584161118016e-16	29.4495051163678
TTC27	0.377115473281936	2.21710081699297	9.00519964892983	1.16237886535004e-17	2.41013805454216e-16	29.4210127988936
UTP18	0.525524792711616	2.92854725985503	9.00374724930633	1.17506273062593e-17	2.43158399317573e-16	29.4103638520163
ARHGAP11A	0.550582000074666	0.939942908414396	9.00321605976943	1.17973579940803e-17	2.43640069269395e-16	29.406469460663
CHD4	0.523121778711662	3.77966492121709	8.99950606403148	1.21289140754874e-17	2.49990395666991e-16	29.3792738788527
PRMT2	0.492221845724181	1.77551109465325	8.988677558754	1.31503623347916e-17	2.70506859274882e-16	29.2999379454756
TATDN2	0.34697104239677	2.10243241656612	8.98741618906453	1.32747552123314e-17	2.72526002264227e-16	29.2907003761632
IGBP1	0.588774337182878	3.72112640622168	8.98613210935418	1.34025851538505e-17	2.74607602718342e-16	29.2812973404691
RRP12	0.522055406669895	1.84248519994841	8.98446825453931	1.35700371755104e-17	2.77491232636224e-16	29.2691145690565
RPIA	0.446427895919165	2.44614258224039	8.98364288740703	1.36538704541258e-17	2.7865698679265e-16	29.2630717517559
C10orf88	0.30591425861863	1.37773781916557	8.9827015718685	1.37501071803023e-17	2.80070810566627e-16	29.2561804656766
CPSF4	0.42108954691446	2.47441589364211	8.98218958497721	1.38027327436538e-17	2.80592539610715e-16	29.2524324493017
SLC6A12	-1.39300541331498	2.14231183134351	-8.98187075497221	1.38356050791049e-17	2.80711456175277e-16	29.2500985129454
SGSH	0.378962118334493	2.08050883288423	8.97892904793263	1.41425868234987e-17	2.86380491077007e-16	29.2285667822933
PSMD11	0.423059665285125	3.23169987996376	8.96791850082134	1.53526820418723e-17	3.10279496208112e-16	29.1480154097141
ISG20L2	0.473687518499502	2.57015792778648	8.96712920858356	1.54432668830238e-17	3.11504187147283e-16	29.1422435012799
TUFT1	0.56342804153449	2.04069618264039	8.9597769704466	1.63129127792846e-17	3.28408019285288e-16	29.0884939151474
TMC6	0.798204230504701	1.34401628658307	8.95922952905302	1.63795734445664e-17	3.29112202982893e-16	29.0844928943552
RRAGC	0.350938893471652	2.1487747578691	8.95790192016215	1.65423562008329e-17	3.3174130543292e-16	29.0747906041351
VPS26A	0.402509724477652	3.25881522666244	8.95756096672774	1.65844197044809e-17	3.31944030616856e-16	29.0722990328989
UBAP2	0.298850440618774	1.97344161665048	8.95717198441162	1.66325379605736e-17	3.32266931412382e-16	29.069456557084
PSMA1	0.37955348388819	3.74174234776034	8.95613939904821	1.67609437601213e-17	3.34189412245951e-16	29.061911355649
STK17A	0.564597013320702	1.8387721501128	8.95481305827174	1.69273209920162e-17	3.36860173304721e-16	29.0522204714319
HOMER3	0.820945079444507	1.66348155004432	8.95292911954554	1.71664598882493e-17	3.40965937512685e-16	29.038457086853
KCTD17	1.05416993423193	1.6406152261593	8.95196602820889	1.72900002492793e-17	3.42764356086858e-16	29.0314218008246
WDR4	0.501238562967688	1.67846445610127	8.93653158232088	1.93943635230416e-17	3.83749806242584e-16	28.9187408488744
SRD5A1	-0.727801505802161	2.25890627500315	-8.93360707607295	1.98207841551997e-17	3.91441646015617e-16	28.8974041966518
ABCA6	-0.747088785487305	2.20145815322824	-8.9293644453337	2.04559604512779e-17	4.03219197662002e-16	28.8664587156385
GTF3C2	0.400891610260756	2.38163974380167	8.92731247413033	2.07703607910659e-17	4.08641113442411e-16	28.8514951505224
CIT	0.301087001581407	0.931637678063488	8.92338808176931	2.13850422318809e-17	4.19939165793533e-16	28.8228834975776
BZW2	0.569259367395891	2.89775784485352	8.92287157719696	2.14672733063814e-17	4.20758556805075e-16	28.8191184077537
CBFB	0.504193833139084	2.22622339254614	8.92164974533564	2.16630463381582e-17	4.23716877033603e-16	28.8102123510005
PSME3	0.521969769981033	3.34303521950113	8.9214216692918	2.16997861553597e-17	4.23716877033603e-16	28.8085499682354
CORO7	0.296790074616967	1.0912797726216	8.91815404626111	2.22329811183851e-17	4.33313710802597e-16	28.7847361702817
CTDSPL	0.635044576502585	2.38731233421765	8.91762484726762	2.23205459854044e-17	4.34205677334048e-16	28.7808799986133
APEX2	0.440081897672243	2.83075043335026	8.91730833441526	2.2373081536737e-17	4.34414151408642e-16	28.7785737003462
RFC2	0.598313667186439	3.1216182954387	8.91199534467378	2.32734529079313e-17	4.5105341195446e-16	28.7398679921621
ACOX2	-1.16890578229367	3.81433094122343	-8.92254098943391	2.3868658354859e-17	4.60869187714266e-16	28.722562432717
DBF4B	0.285020753666704	0.754920920795429	8.90892266333867	2.38104540829071e-17	4.60601484195976e-16	28.7174899406878
STIL	0.350830913720508	0.895433892309547	8.9059384126937	2.43437445575693e-17	4.69170349654971e-16	28.6957606708523
SLC7A1	0.608489180940766	1.00330506545669	8.90486262056513	2.45388776945003e-17	4.71709415463119e-16	28.687928637169
RBM12	0.431453057244342	2.37763280488748	8.90471208103537	2.4566306677469e-17	4.71709415463119e-16	28.6868327205633
IFT52	0.497641865102176	2.24876290976188	8.90022609604021	2.53977581071552e-17	4.86774743943042e-16	28.6541805520043
YWHAQ	0.744246054724294	4.70823701767391	8.89607528810168	2.61918869209313e-17	5.01070573360284e-16	28.6239774697222
C1orf35	0.509788446027742	2.09591717707083	8.8944053286636	2.6518276474051e-17	5.06382088258165e-16	28.611828677547
PKN1	1.063412424924	3.76953038193789	8.89508320546203	2.73699085925879e-17	5.21685523779455e-16	28.5844093609054
MMD	0.686396268516316	2.47292386674216	8.8888488461397	2.763355453877e-17	5.25746088917112e-16	28.5714163826085
SMARCA4	0.528348026300916	2.62383017579001	8.88772677411231	2.78643485450412e-17	5.29167920815151e-16	28.5632575274364
PARP1	0.646250144982442	3.79586938071693	8.88334401550052	2.87842565044699e-17	5.45640249212469e-16	28.5313957963038
NUP210	0.733125277491962	2.48038289236442	8.87592719330533	3.04100072545348e-17	5.75408297559395e-16	28.4775001440844
DR1	0.39720863199336	1.94430802043993	8.87219602315944	3.12619303663196e-17	5.90092610566707e-16	28.4503979137931
PYCR1	1.61326418658761	1.63085680114103	8.87203304982424	3.12996754353346e-17	5.90092610566707e-16	28.4492142863083
PDCL	0.374157875950317	1.83670766635977	8.86974892579413	3.18334588652459e-17	5.99068787485824e-16	28.4326268405867
ZNF142	0.325398328916265	1.39095202610824	8.86611022602686	3.27024780329307e-17	6.1430984051733e-16	28.4062080791787
VPS16	0.432022271346925	2.95931191309269	8.86165705220842	3.37980458371021e-17	6.33743863097142e-16	28.3738853591805
GLG1	0.503994976950767	2.60328328778847	8.85769872063151	3.48023439379336e-17	6.51399547436493e-16	28.345163187349
VPS45	0.390533132848432	2.27027870859025	8.85631051315995	3.51615115838459e-17	6.56938457433437e-16	28.3350921364602
AMD1	0.464401108864507	2.42056806687154	8.85433932605478	3.56778281065605e-17	6.65388291509785e-16	28.3207934869511
PNMA1	0.717930290991604	2.23286761029517	8.84875771932027	3.71809170676333e-17	6.92178076162321e-16	28.2803166441926
CDC25B	0.855976193600534	3.1124986520542	8.84206037570971	3.90674355345125e-17	7.25997353009868e-16	28.231770465536
STARD5	-0.291299824543703	0.997230970965957	-8.83877925361518	4.00259628170075e-17	7.42481610255489e-16	28.2079956984127
INTS8	0.356759343466676	2.1808911655489	8.83841286193109	4.01344334429863e-17	7.43166657051234e-16	28.2053412060789
UGP2	-0.892420982095097	4.51486365253282	-8.83323324264841	4.16993787783939e-17	7.7077072375437e-16	28.1678227078271
YKT6	0.604028693822169	3.1682869170447	8.83244703270869	4.19421452942989e-17	7.73881004115767e-16	28.162129052822
RECQL4	0.834815421535268	1.98698178583834	8.83087117494994	4.24329622567632e-17	7.8104813176503e-16	28.1507178347715
RGS19	0.577517163761464	2.11210591358228	8.83071804511087	4.2480958264078e-17	7.8104813176503e-16	28.1496090499624
CENPE	0.346876177553489	0.945246818722857	8.82848574843231	4.31867701536583e-17	7.92622205576329e-16	28.1334468179729
SERPINB1	0.769659310355582	3.88470812872136	8.82548340568433	4.41544024464018e-17	8.08952262104449e-16	28.1117134900658
POP7	0.551048365502031	4.33348779155865	8.8242489494354	4.45584595048294e-17	8.14917741789029e-16	28.1027789113017
PRPF3	0.500521161024825	2.62049792840258	8.82366571034013	4.47506345406549e-17	8.16783816181755e-16	28.0985579049848
RNASEH1	0.353021206314199	2.15947077873643	8.82346260684561	4.48177488663458e-17	8.16783816181755e-16	28.0970880509095
ASPM	0.501408665146027	1.75872700636875	8.8191554146848	4.62647406846791e-17	8.41677979391325e-16	28.0659221943281
CBX1	0.631724817581373	3.05539920528387	8.81277660912755	4.84930864538195e-17	8.80675143500485e-16	28.0197847588382
NT5C	0.692310195861794	2.99647089468843	8.81028099198117	4.93935370070315e-17	8.95462587136202e-16	28.0017400399919
KCTD2	0.423153209071147	2.23831291669364	8.80746974251614	5.04277153749063e-17	9.12618653858061e-16	27.9814170967919
DGUOK	0.585136942999181	3.72273624126129	8.8068491909886	5.06588718275999e-17	9.15207583556709e-16	27.9769316045154
MCM4	0.851540260548524	2.39616433043895	8.80500549792658	5.13518586609573e-17	9.26116506545181e-16	27.9636061690109
PPIA	0.55503149286315	5.50753731250638	8.80040712260685	5.31214188805693e-17	9.5636966955174e-16	27.9303789525312
USP39	0.422081877927068	2.78816909150961	8.79872314697691	5.37844463137614e-17	9.66631190843173e-16	27.9182136027495
CCNA2	0.930041371649565	1.79755165635958	8.79643282398807	5.46993796115942e-17	9.81376779629086e-16	27.9016703174813
SEPHS1	0.44398671265322	3.38379258081553	8.79462505516376	5.54324125945405e-17	9.92813624193253e-16	27.8886145582315
CDC123	0.511026409819547	3.78275740493211	8.79366590110423	5.58252817591715e-17	9.9812913410374e-16	27.8816882282748
MED25	0.439623361084872	2.22601641785038	8.78713979590162	5.85725642276434e-17	1.04544982336213e-15	27.8345743778042
UCKL1	0.492582455931545	3.1499952134614	8.78682385438155	5.8708910841806e-17	1.04608604772672e-15	27.8322940818347
GSTZ1	-0.673850341779249	1.98259700176679	-8.78589472049071	5.91117085174363e-17	1.0514596371218e-15	27.8255884023991
GMPS	0.392363988503173	2.55011398993282	8.78408703213855	5.99032343117087e-17	1.06371760347014e-15	27.8125434046349
NCL	0.549126513767406	5.13222454048626	8.78346429165972	6.01783347326108e-17	1.0667790805501e-15	27.8080498665333
SH3BGRL3	1.01705982143797	4.77034229857715	8.78262553157865	6.05508417052439e-17	1.07155390738343e-15	27.8019979133817
MCM5	0.757481698999473	2.6381945963135	8.78163731033926	6.09926575937979e-17	1.07753695082376e-15	27.7948680276167
SMARCAL1	0.313925476043062	2.01712582384565	8.78082231152672	6.13594296802344e-17	1.08217615537907e-15	27.7889883119569
POLQ	0.228669209054856	0.763737823536394	8.78026988996338	6.16092757532784e-17	1.08474094326281e-15	27.7850031319223
GPLD1	-1.31916334118886	1.68651096863123	-8.7773748628679	6.29351880468508e-17	1.10621105487426e-15	27.7641210203456
PAFAH1B2	0.449263450098006	2.66498841722019	8.77662916689367	6.32812660871634e-17	1.11041518938083e-15	27.7587429695442
CORO1C	0.57190937628606	3.13358092460522	8.77619682202778	6.34827799881808e-17	1.11207271250796e-15	27.7556249817114
TUBG1	0.69317842414473	3.41885273571994	8.77392574277541	6.45518010717317e-17	1.12889580729486e-15	27.7392480398813
MYO9B	0.452005609953797	2.42061854168735	8.76779430666319	6.75277807679654e-17	1.17895560776071e-15	27.6950475434238
SMAP1	0.268909901664755	1.89323332218749	8.76250204606876	7.02054206244077e-17	1.22364749907105e-15	27.6569127278542
POLD3	0.380860119599097	1.63201944916804	8.76148298922099	7.07329588605099e-17	1.23077718030649e-15	27.6495713629671
ZDHHC7	0.527973248748576	2.50547065364111	8.75708884974854	7.30530025836999e-17	1.26902105491551e-15	27.617922022684
PRPF4	0.418127564181485	2.53197463793726	8.75572393472438	7.37888796282229e-17	1.27966424303502e-15	27.6080931610846
YWHAZ	0.840687043932532	4.52476761975949	8.75300828363442	7.52748873221481e-17	1.30325921583746e-15	27.588540517317
TRAFD1	0.52026224910174	2.32461566922535	8.75088417295919	7.64578227997535e-17	1.32153721005631e-15	27.573249716217
UFC1	0.575958041176022	4.77398698535743	8.7497126203764	7.71181270984284e-17	1.33073605365195e-15	27.5648171169993
CDK4	0.727404985147169	3.3356067940144	8.74754009793773	7.8357571121025e-17	1.34988134130217e-15	27.5491816910948
PTGES3	0.513967356339854	5.57159664726878	8.74384733822286	8.05097396442702e-17	1.3846608864647e-15	27.5226110928394
KIF2A	0.39995303080669	1.35990742466826	8.74054539248753	8.24836437160919e-17	1.41626461309547e-15	27.4988587390414
FAM50A	0.876688518761472	4.3530072963937	8.74110261413973	8.28532042086248e-17	1.41958247982852e-15	27.4951569380298
EHBP1L1	0.56668287475214	2.08911354526701	8.73977639058578	8.29501891852052e-17	1.41958247982852e-15	27.4933278110464
RPS2	0.917329618882204	6.87107708304242	8.73477641136666	8.60479953593788e-17	1.4701752891336e-15	27.4573739928425
GTF3C1	0.360045792117381	2.32195079122101	8.7343881595854	8.62932799885789e-17	1.4710068111601e-15	27.4545827176926
CNOT3	0.439665265161285	2.11777855377445	8.73425135051105	8.63798762810612e-17	1.4710068111601e-15	27.4535991697037
S100PBP	0.273728049970392	1.39891326627794	8.73346240106417	8.68809404557464e-17	1.47711818241292e-15	27.4479274499435
LMNA	0.699732364843046	5.14411095673848	8.73291573019767	8.72298195629504e-17	1.48062641441165e-15	27.4439976559455
DYNC1H1	0.481841326457328	3.23655585088284	8.73100132776607	8.84625389643676e-17	1.49910090499486e-15	27.4302370665093
RBBP7	0.443174952334383	3.23272714380308	8.72943248525044	8.94855925427061e-17	1.51396797285608e-15	27.418961809709
PKNOX1	0.243585974370837	1.28790539657122	8.72537924562275	9.21832864510989e-17	1.55707313764881e-15	27.3898373555537
GPSM2	0.310596316243681	0.97696401453319	8.7249700298	9.2460080803909e-17	1.55921318082956e-15	27.3868974376023
PABPN1	0.476946694822389	3.69431710892627	8.72356351798837	9.34177375885775e-17	1.57280949444108e-15	27.3767933622968
HSF2	0.456307550651532	1.51888703726437	8.72326418657449	9.36228083559742e-17	1.57371154239783e-15	27.3746431681611
DTX2	0.35331328722103	1.61968183311662	8.72119992753679	9.50492105345438e-17	1.59510694512575e-15	27.3598162455318
PHF20	0.302312151747911	1.83637297804725	8.72030601909258	9.56735573735011e-17	1.60299502257408e-15	27.3533962960956
SAP30BP	0.349090171728599	2.50965600351991	8.71941770607025	9.62980181689307e-17	1.6108596018339e-15	27.3470169595543
KBTBD2	0.368455424417512	2.59727948753458	8.71545837900566	9.91307578380396e-17	1.65557928042051e-15	27.3185886046729
TULP3	0.495060494796941	2.02184776995143	8.71425644663536	1.00006903418176e-16	1.66753083901768e-15	27.3099602877914
ALDH5A1	-0.973233725199607	3.64241417052678	-8.71735746192739	1.00292210734039e-16	1.66960814920704e-15	27.3092289874231
XRCC6	0.539246474283399	5.34618252984271	8.71168807775637	1.01904886450678e-16	1.69374073671943e-15	27.2915253428939
TRMT1	0.539750485105035	2.87306662043082	8.70818265351251	1.04553009978941e-16	1.73497870233425e-15	27.2663702614393
TDG	0.304504481196175	1.96430252942607	8.70753813548816	1.0504726422968e-16	1.74040028838584e-15	27.2617458940939
ABAT	-1.42180583526797	3.74726068234543	-8.7292388618638	1.08135133756127e-16	1.78302820548992e-15	27.2483609813778
CUEDC1	0.572489880677823	1.81040932670949	8.70562056666543	1.06531488860629e-16	1.76218010554811e-15	27.2479888131776
COIL	0.406387496170969	2.45420248920654	8.7047686461845	1.07197529972428e-16	1.77037828514083e-15	27.2418775771369
METTL5	0.414286881745273	2.82646830049945	8.69813916585194	1.12523357653192e-16	1.85244475325096e-15	27.1943345370942
TIMM50	0.482282680396752	2.72093636110888	8.69718639963318	1.13309993647453e-16	1.8624433765977e-15	27.1875037690311
CXXC1	0.409843040708086	2.81335314673915	8.69679375812725	1.13635753647687e-16	1.86484709145682e-15	27.1846889055778
PRKCD	0.713541462310266	2.27884025400727	8.69576408903256	1.14494442121644e-16	1.87597518100888e-15	27.177307561073
ZBTB40	0.3415950066092	1.28824023582608	8.69284386150471	1.16964854047191e-16	1.91343449423972e-15	27.1563765752105
CCT5	0.64211801368173	3.8574633684221	8.68756221724681	1.21567708129247e-16	1.98560589944438e-15	27.1185316642684
SLC16A2	-1.36017472121272	2.94438628538924	-8.68558335458534	1.27568086929207e-16	2.08034110992246e-15	27.0743759585668
MTF2	0.352808861310187	1.56717483140373	8.66783388543337	1.40402399715017e-16	2.28605035774231e-15	26.9773047993516
KLKB1	-1.40848364811782	3.68500258185368	-8.68286475682649	1.41969117213193e-16	2.30433623376664e-15	26.9763458156149
RBM15B	0.37905790787674	2.65043624933844	8.66631873472619	1.4196299612083e-16	2.30433623376664e-15	26.9664672118093
ATG4B	0.391974970937092	2.57807573544426	8.66395325172341	1.44433826943848e-16	2.34068423446598e-15	26.9495498534054
PSMD1	0.388560231535692	3.78034966985537	8.66282855046461	1.45623502670786e-16	2.35628807748307e-15	26.9415073314153
TSEN34	0.439431863277389	3.17450737635758	8.66050646359385	1.48110511112736e-16	2.39280247191151e-15	26.9249047128623
PYCARD	1.15264805246649	2.39863904529192	8.6589044420583	1.49850776423597e-16	2.41133937508101e-15	26.9134521781272
TBRG4	0.418789521562277	3.07509712252026	8.65890373794744	1.49851545727145e-16	2.41133937508101e-15	26.9134471448851
IQCC	0.283906558924517	0.89321282607303	8.65880972629495	1.49954296910121e-16	2.41133937508101e-15	26.9127751176252
GNG5	0.585141373876731	5.49228747333633	8.65669732782711	1.52281546755686e-16	2.44497790988881e-15	26.8976762436931
ZNF263	0.266792019541684	2.08799292501904	8.6518336347976	1.57776729834839e-16	2.52929732951281e-15	26.8629210712611
SPHK1	1.20454817112517	1.40910441084198	8.64759854986121	1.62721264606028e-16	2.60454313825488e-15	26.8326683291321
RABEP2	0.453313659706904	1.82909226517127	8.64698380904743	1.63451619446807e-16	2.61220834278989e-15	26.8282778259014
ABCC1	0.682070579559936	1.35548705540084	8.6445987046558	1.66316135751647e-16	2.65390478984348e-15	26.8112452665744
EXOSC9	0.34357731150765	2.11886984346758	8.64260430889606	1.68749516233073e-16	2.6886042555662e-15	26.7970052260661
WDHD1	0.359851175605035	0.727943005963854	8.64135144220807	1.70296138775561e-16	2.7090907957129e-15	26.7880608332167
PSMD8	0.420311729123475	4.76071923854333	8.63913561415796	1.73065933516514e-16	2.74894329873019e-15	26.7722438197435
MTA2	0.484327512093802	3.09200480399112	8.6343791840665	1.79162978469374e-16	2.84144277914482e-15	26.7383005440756
RNASET2	0.535700905653757	2.35435283193084	8.63175811554245	1.82613170270185e-16	2.89174636092482e-15	26.7196011129483
RBMX2	0.427056803298857	2.41008683876802	8.6315240922313	1.82924401543652e-16	2.89226588011485e-15	26.7179317081328
TXNDC9	0.352253476848889	2.69687974439156	8.63061567392487	1.84137503853098e-16	2.9070218693404e-15	26.7114517915194
CDK5RAP1	0.267738986932575	2.41624151237187	8.63003076084931	1.84922807866636e-16	2.9149895722589e-15	26.7072797364955
ETV4	1.42293973195829	1.52833470559382	8.62682598311729	1.89284747162372e-16	2.97922720230715e-15	26.6844240879631
DUSP22	0.421370356321315	2.50822359843319	8.62395427385436	1.93279780290396e-16	3.03750432323242e-15	26.6639485681121
SLC16A3	0.855586736856825	1.27998658813856	8.62228380330097	1.95641963373095e-16	3.06998295395727e-15	26.6520400525783
EIF2S3	0.640356524024213	4.49257671759646	8.62144312177262	1.96841542634821e-16	3.08414772984996e-15	26.6460475468094
MRPS16	0.418676146654202	4.30396361103086	8.61312146379627	2.09115575722686e-16	3.27152500091456e-15	26.5867503694801
PON3	-1.27739503497383	3.98661088190186	-8.62628525202407	2.13852457805529e-16	3.34060049877268e-15	26.5750589132952
TBC1D22B	0.480145707735754	1.45568138534754	8.60693881485628	2.18722322923044e-16	3.41154277856543e-15	26.5427195689761
LRRC1	0.659478816526486	1.51837350955877	8.6067092246856	2.19087354521899e-16	3.41211310160942e-15	26.541084906437
GOSR2	0.319863033888886	1.92249843656347	8.60631258537347	2.19719403237182e-16	3.41683407309558e-15	26.5382609362727
ZNF586	0.249376846104338	1.07833283698127	8.60511925441207	2.21631891058786e-16	3.44142314546886e-15	26.5297652460913
SRM	0.726016247086794	4.30249967787724	8.60105267200909	2.28273762793005e-16	3.53926544461752e-15	26.5008198607857
ENO1	0.991510536757665	6.80340963897789	8.60350984534895	2.29777682710298e-16	3.55727357376241e-15	26.4971476863285
RBM15	0.229704945445795	1.75942368235529	8.59924686570714	2.31285956384131e-16	3.57529540910469e-15	26.4879692839437
CCT7	0.521792355302849	4.99900550608293	8.59833897428283	2.3281520127838e-16	3.59358738615128e-15	26.4815091737578
CTSC	0.771572521172246	2.591041058058	8.59670934125001	2.35585285957346e-16	3.63094948149096e-15	26.4699146391393
TST	-0.972599210415338	6.5345107517434	-8.60283393140036	2.38675347600206e-16	3.67312520129027e-15	26.4620753271734
THOC6	0.550574684001249	3.01719875388537	8.5933496751627	2.41399476066899e-16	3.7095528955369e-15	26.4460158443
RASSF1	0.40523016688439	2.35357874632737	8.59131551524803	2.44988553054842e-16	3.75914488793752e-15	26.4315489758101
BRCA1	0.335219101719603	1.09098222439346	8.58952857287732	2.4818498120662e-16	3.80257460881175e-15	26.4188421849026
ZNF692	0.528305842816588	2.38482973121114	8.58805682184648	2.50848573963886e-16	3.83772457487017e-15	26.4083780098716
STX4	0.398873269826464	3.13100617119526	8.5878345566104	2.51253283686595e-16	3.83826339843581e-15	26.4067978037129
GMNN	0.876765712395038	3.44378043794686	8.58408742359447	2.58174314520275e-16	3.93820085056772e-15	26.3801614569536
CHML	0.643556373973827	1.15932461382683	8.5762840386635	2.73198639839647e-16	4.16127195110594e-15	26.3247161939879
SSB	0.480712575743403	3.20122531317549	8.56861020797739	2.88816623962719e-16	4.39271901863064e-15	26.2702241455543
BAZ2A	0.530337322333966	2.14444095981281	8.56821330356601	2.89648019102902e-16	4.39892342462126e-15	26.2674066006365
RBM38	0.689138480071693	2.46200081008517	8.56629672074399	2.93696133718585e-16	4.45389114900535e-15	26.2538023851023
CRYL1	-1.18491805047518	4.92466188402936	-8.56875681965734	3.05341187871545e-16	4.62373798776911e-15	26.2206467155224
ARHGEF2	0.614437849834351	1.82276195611621	8.56008478951405	3.07205393206114e-16	4.645195960153e-15	26.2097230121384
NUP107	0.335719038586702	2.11767470814146	8.55877272823115	3.10136479415434e-16	4.68270021535978e-15	26.200415451993
C12orf4	0.270936419843173	1.41915662263321	8.55563520623379	3.17258255810713e-16	4.78327831837691e-15	26.1781622080903
DNAJC10	0.377822803800582	1.69637710001709	8.55251901739319	3.24491754729979e-16	4.88524688135511e-15	26.1560656519431
SLC36A1	0.336588837678861	1.35221252075613	8.5491885015698	3.3240324352398e-16	4.99711272608844e-15	26.1324552563586
PLAGL2	0.469081435790568	1.3061954866028	8.54474222289043	3.43263404821382e-16	5.15291943538225e-15	26.1009446488512
ENTPD6	0.565671611012583	3.37397556613805	8.54405294544392	3.44978129849576e-16	5.17118732016941e-15	26.0960607443667
SLBP	0.542229141096476	3.63421446838254	8.54273013590408	3.48292678561771e-16	5.21334920014362e-15	26.0866886574118
ZBTB17	0.36675438169794	2.07261111833912	8.53899942005163	3.57811414333881e-16	5.3481222620149e-15	26.0602618026103
FAF1	0.325892924358548	2.58397161960977	8.53798672745851	3.60439374209022e-16	5.37966123460247e-15	26.0530896342608
CDC7	0.452277414233959	1.26726785160099	8.53492134583493	3.68511071055098e-16	5.4922424764998e-15	26.0313832155416
DDX23	0.440118761949982	3.39126957951471	8.53324219662464	3.73008129752235e-16	5.55130150697166e-15	26.019495118125
GGPS1	0.405958573536435	2.55859364167738	8.53245061490984	3.75146918132647e-16	5.57514475759934e-15	26.0138913926603
METTL1	0.487042354441189	2.32853974861027	8.53172129041863	3.77128231521364e-16	5.59658295577704e-15	26.0087287025918
KIF14	0.346426370987444	1.02080367887812	8.52979260721035	3.82417809194837e-16	5.66698459617114e-15	25.9950774977176
SSNA1	0.680325059982842	4.57974040711731	8.52877681187417	3.85233161318324e-16	5.70057276321189e-15	25.9878885347514
RHOT2	0.446942537692707	3.1408001789201	8.52852872811286	3.85923854105447e-16	5.70266998072174e-15	25.9861328890397
SMARCC1	0.535569533776522	2.73824506949481	8.52802379723464	3.87333425176633e-16	5.71536877945293e-15	25.9825596862257
C6	-1.60871022926222	4.58322830004998	-8.59993583511281	4.14181995098214e-16	6.08560475966088e-15	25.9667027972845
MYL6B	0.642216659835366	2.65173838852628	8.5235689057118	3.99992567436512e-16	5.89379119224182e-15	25.9510402457263
STK25	0.436698256159619	2.87489369268882	8.5199253794196	4.10649763430124e-16	6.04225175993219e-15	25.9252695926922
SH3BP1	0.514067190419197	1.03707392790714	8.51797654238022	4.16464885368015e-16	6.11050456102111e-15	25.9114884960106
CDKN2D	0.487536347136638	1.47640094146021	8.51648800314596	4.20961346191294e-16	6.16776652219346e-15	25.900963790371
PEA15	0.732627512783833	4.71147850838205	8.51176934573249	4.35534981796825e-16	6.37230618437383e-15	25.8676086883976
NFKB2	0.71608560266178	3.24194511768584	8.50810464235787	4.47196900832794e-16	6.53372912215339e-15	25.8417122765941
OIP5	0.543996611366806	1.35448811286438	8.50695125830496	4.50930757723263e-16	6.57902908880514e-15	25.8335634996495
NRSN2	1.07020294915018	1.6581590381673	8.50102552621518	4.70605993628827e-16	6.85645871222476e-15	25.7917092533832
IRF3	0.576303499757065	3.50365762680311	8.49600994028179	4.87921267857589e-16	7.09877609314374e-15	25.7562987546599
KIAA0100	0.493984223118329	2.78369211725384	8.49480515782058	4.9217354537118e-16	7.15062767736479e-15	25.7477949649139
GNL2	0.387597022348387	2.87315280429071	8.49294131335919	4.98824326984928e-16	7.23713283340702e-15	25.7346408696726
ANAPC5	0.331437561205201	2.81880699337939	8.49229343263388	5.01156932922149e-16	7.2608343363951e-15	25.7300689000224
NFYC	0.390711436515494	2.63897478685284	8.49172810586698	5.03201129595909e-16	7.28029712290014e-15	25.7260796887596
ZG16	-0.840682484295039	1.58268619247618	-8.48714382018654	5.20085284811459e-16	7.51411118028017e-15	25.6937373906389
ITGB1BP1	0.400996424185958	2.12945497346185	8.4805882565829	5.45207842427327e-16	7.86613759324316e-15	25.6475080082281
DCLRE1C	0.219844329899524	1.26517739784852	8.47831638272699	5.54191407991549e-16	7.98466067436368e-15	25.6314925027433
CPB2	-1.11234536686815	7.13177753119281	-8.49988359321039	5.83006499008444e-16	8.38818768933479e-15	25.60070261721
BCL9	0.638742007668816	1.67281680179491	8.46556875686601	6.07382835834441e-16	8.72682281970702e-15	25.541681944207
PLXNA3	0.479983389671809	1.11870006147525	8.45840523567511	6.39458809907555e-16	9.17499739961283e-15	25.4912528033597
EMG1	0.314537224175927	2.03731608856269	8.45593163951345	6.50919523162128e-16	9.32655449187336e-15	25.4738460608741
AAAS	0.373686763425888	2.80956897746857	8.45044599896942	6.77065741506652e-16	9.6878222076737e-15	25.4352557254431
USP1	0.505658039711239	2.45158269791431	8.44699981854448	6.94019879330856e-16	9.91675172832041e-15	25.4110211851227
ETFDH	-0.734249271825773	2.88441113866027	-8.44483055584509	7.04906665899842e-16	1.00584758864939e-14	25.395769713339
RAD1	0.308080433955434	1.76688846485293	8.44423683486577	7.07915682043868e-16	1.00875556996868e-14	25.3915958889661
BARD1	0.304756330717092	1.12516418047957	8.44094200982382	7.24846440763961e-16	1.03146641461041e-14	25.3684370496232
SLC41A3	0.395317389160356	2.38388308299182	8.43901919947418	7.34911429128727e-16	1.04435840298074e-14	25.3549247122157
C11orf49	0.366834509099861	1.44448446559568	8.43676167224018	7.46905064442029e-16	1.05961815559867e-14	25.3390628358312
ACBD4	-0.839665632870635	3.05006679126462	-8.43661522630421	7.47689745912422e-16	1.05961815559867e-14	25.3380339736596
NAGK	0.315651441632291	2.14961044147973	8.43512652318192	7.55712888991802e-16	1.069529358426e-14	25.3275757093698
MAN1B1	0.422600467985918	2.89993145501421	8.43196385153137	7.73041370242409e-16	1.09256513660927e-14	25.3053618042925
YBX1	0.644267833031584	6.3173198309228	8.4305761696974	7.80768089294122e-16	1.10198626516132e-14	25.2956168070942
BRMS1	0.559872695001603	3.60735859881996	8.42347709208937	8.21507446756615e-16	1.15791307420729e-14	25.2457804486774
GNAZ	0.827731068473716	1.53587580170688	8.42047071115439	8.39387482273495e-16	1.18151181109174e-14	25.2246838389494
EPHX2	-1.21942570059625	3.59904830042176	-8.42466994056286	8.59222665284007e-16	1.20779499959002e-14	25.2071786422327
EXOSC2	0.372161724453961	2.01921772838744	8.41244404150254	8.89032857462513e-16	1.24800990855684e-14	25.1683833759786
LSM8	0.351137423892645	2.02131106816414	8.41168526344382	8.93873554880284e-16	1.25311180676065e-14	25.1630630499572
RBM34	0.146837663436248	1.01137379237815	8.41096346249273	8.98502546501029e-16	1.25790356510144e-14	25.1580022972621
SERPINA10	-0.938269721988719	4.57523530028819	-8.42155644645217	9.21019047105824e-16	1.28596046523324e-14	25.1432792510511
C20orf27	0.677619903808599	3.07715433855165	8.40864409733398	9.13538003231545e-16	1.27723186777514e-14	25.1417425514724
SSRP1	0.512283118634386	3.49983387651793	8.40726417755934	9.22601236480717e-16	1.28644048920291e-14	25.1320701588321
DYRK2	0.415756166485077	1.4114978430145	8.40247886526389	9.54725341594548e-16	1.32944863920699e-14	25.0985363614455
XDH	-1.42374511249405	2.13620039662895	-8.40211694390053	9.57199464676035e-16	1.33110950991361e-14	25.0960006679
RPS27A	0.733355047509543	6.1185294672453	8.39974120330274	9.73598402265763e-16	1.35210430517871e-14	25.0793575870139
ADI1	-1.07928141134644	5.14572862592153	-8.40118899793676	9.8545423904832e-16	1.36674214088571e-14	25.0696497472969
CNIH4	0.453678294602647	2.83770776462552	8.39781337743315	9.87109527761007e-16	1.36721250325084e-14	25.0658546800181
SNRPC	0.654722279677111	5.33711147679041	8.39607107024312	9.99479905486833e-16	1.38250296380789e-14	25.053652989234
PHIP	0.286270452556547	1.82063749668116	8.39410320287995	1.01363623129754e-15	1.40021983653176e-14	25.0398737196726
TNFRSF21	1.11875690793929	2.35958088447568	8.39320860697734	1.02013711903859e-15	1.40732860459135e-14	25.0336103624831
CSTF2	0.492826568907096	2.13104398754947	8.39075381112374	1.03818833099817e-15	1.4303316157041e-14	25.0164258579853
SPATA2	0.318597239394017	1.94334261815812	8.38951545163816	1.04741406757363e-15	1.44113077270925e-14	25.0077581617014
OTUB1	0.421158360803619	3.17195526449424	8.38783611232343	1.06005475475832e-15	1.45659375561236e-14	24.9960052821604
DMWD	0.353573323909942	1.69620587339477	8.38391728916864	1.09014232591556e-15	1.49595752729338e-14	24.9685855401745
USP21	0.453807116617841	2.13619089074251	8.38020384055096	1.11943188784766e-15	1.53412380619544e-14	24.9426107984222
ARL2	0.757356258256527	2.79934245586137	8.37952167449409	1.12489642599683e-15	1.53958156432873e-14	24.9378400471618
GMEB2	0.322259870115042	2.19063172170096	8.37765153709883	1.14001296823679e-15	1.55821772553207e-14	24.9247625279913
RAB3IL1	0.707490344045126	1.60283573275905	8.37729404457983	1.14292541306735e-15	1.55903840990891e-14	24.9222628752221
UPF3B	0.430734447093639	2.1800298053934	8.37720953134923	1.14361500611339e-15	1.55903840990891e-14	24.9216719538938
SSR1	0.480066839244894	3.65446118198376	8.37425571711222	1.16797718266985e-15	1.59016343035052e-14	24.9010212548268
WSB2	0.459610380672439	3.47530319825249	8.3699869616461	1.2040940984207e-15	1.63718972439715e-14	24.8711862654602
NARF	0.453310652322477	2.47162623152313	8.36670721595423	1.23259160771177e-15	1.67374661711241e-14	24.8482706260077
RNF125	-0.444758714429596	1.27859967070442	-8.36443445673718	1.25272973752587e-15	1.69887160749592e-14	24.8323943922537
ANKRD27	0.356081514082446	1.84585399175289	8.36386515624648	1.25782486412546e-15	1.70355732575427e-14	24.828418033524
NONO	0.625956963310498	5.00846065161949	8.36331405910568	1.27206882237355e-15	1.72060558942922e-14	24.8184706798696
MIER2	0.468958781069686	1.68481828098334	8.3617322265386	1.27709705792585e-15	1.7229345514035e-14	24.8135219214145
ATP13A1	0.432774375967241	2.76935410580453	8.36169684841219	1.27741916851469e-15	1.7229345514035e-14	24.8132748667792
PPME1	0.291600273489897	2.13123262541556	8.36154897422639	1.27876640270707e-15	1.7229345514035e-14	24.8122422306552
ABCB11	-1.39583922778162	1.53798358154721	-8.35852986203893	1.30658184997101e-15	1.75813112143768e-14	24.7911618539717
CPNE1	0.714506403151813	3.81630492564162	8.35730522032071	1.31803445764004e-15	1.7712473410045e-14	24.7826124994731
SELENBP1	-1.10839314180841	5.10118489473795	-8.37011001637565	1.33794390147484e-15	1.79567974787088e-14	24.7782805804643
TTF2	0.276327971101581	0.941434721604366	8.35402035040859	1.34924652891976e-15	1.80851263773142e-14	24.7596846731575
RNF44	0.535099295773184	2.39309803482527	8.35233666138356	1.36552677863205e-15	1.82797579593166e-14	24.747935186821
SOCS7	0.359887136501862	0.906258943260856	8.34757107277087	1.41266773373233e-15	1.88864767284575e-14	24.7146876384857
RCN2	0.329020352294787	2.01158571611342	8.34419136242544	1.44707156989779e-15	1.9321567439715e-14	24.6911166079769
PRR14	0.329104438820177	2.61807905055075	8.34320422447101	1.45727560493683e-15	1.94328356663463e-14	24.6842332605004
GINS2	0.517662425373956	1.751213139949	8.34257625915362	1.46380387445388e-15	1.94948649331115e-14	24.6798547245296
SCP2	-1.16446696523905	4.46060934221784	-8.34459570310901	1.49689100674777e-15	1.99099920334134e-14	24.6615871204047
GYS2	-1.89093471012135	2.49515025635633	-8.40421490462334	1.57334707409384e-15	2.06623633447368e-14	24.6577968643621
PPP1R14B	0.809097884478247	4.19995274219866	8.33790793578701	1.51325054413928e-15	2.01018499392823e-14	24.6473115109404
RBP4	-1.1987407329072	10.6170842624315	-8.36337693146257	1.55914550701997e-15	2.06029640175325e-14	24.6386980360496
QSER1	0.385311588809078	1.16197045042414	8.33529438845938	1.54165064134747e-15	2.04327297781655e-14	24.6290976973467
CLCN2	0.385511624869195	1.29690736063347	8.33525407466424	1.54209281344645e-15	2.04327297781655e-14	24.628816780898
NPEPPS	0.393422660410303	2.21351123974008	8.33480146159492	1.54706580709237e-15	2.04725090497777e-14	24.6256629250656
DDX52	0.287581391832001	1.6391510729474	8.33355071842271	1.56089070868291e-15	2.06029640175325e-14	24.6169482200795
ZNF576	0.28583600521409	1.94491931631253	8.33327910204376	1.56390908793396e-15	2.0616608636368e-14	24.6150558175894
MARK2	0.49673832088321	1.98621060554149	8.33276150598977	1.56967694343516e-15	2.06623633447368e-14	24.6114497445678
PRKCI	0.402324968382929	1.77163393924934	8.33259050185968	1.57158715510767e-15	2.06623633447368e-14	24.6102583984683
TBX19	0.200828668332163	0.85138513070809	8.33014778948216	1.59912589782447e-15	2.09743937204553e-14	24.5932424047349
PON1	-1.43032036842102	5.75173134543921	-8.40272063372642	1.70881167959557e-15	2.22166905227018e-14	24.583475732038
RPS6KC1	0.361322966383033	1.9723526066194	8.3287260234744	1.61537380395162e-15	2.11607857193562e-14	24.5833399118591
CHAF1A	0.545110349394444	1.99008152992144	8.32808251463049	1.62278137161448e-15	2.12310489777471e-14	24.5788582996622
NANS	0.40625109072317	2.86954695519941	8.32679591149889	1.63769260111758e-15	2.13991833212697e-14	24.5698986693474
RBM3	0.730452219573979	4.37728287327437	8.32334481269377	1.67836195064881e-15	2.19030451549496e-14	24.5458706078342
MASP1	-0.978879592600549	2.28028627750785	-8.32276568019021	1.68528390025647e-15	2.19657831315736e-14	24.5418390984715
RNASE4	-0.615026970363266	2.68295525406863	-8.32170925969844	1.69798331973083e-15	2.21035723375488e-14	24.5344855412056
PELP1	0.476325040576631	2.69585868737892	8.31889279951704	1.73230480459129e-15	2.2493977887618e-14	24.514883765322
RPL35A	0.749076812768191	5.89734351279384	8.31544279224401	1.77528274264701e-15	2.302326732911e-14	24.490878841081
IPO9	0.428617116416569	2.50252015878547	8.30572343591436	1.90211154814068e-15	2.46373251397574e-14	24.4232887077573
PAQR4	0.683531175028131	1.37499688198407	8.30266006208963	1.94391262484037e-15	2.51474026735264e-14	24.4019966387175
DECR1	-0.724451477577356	5.07076694296817	-8.30030636054508	1.97664582793885e-15	2.55390508216775e-14	24.3856408094841
FTCD	-1.33989416551461	5.48784945465745	-8.34571007238349	2.08444821747099e-15	2.67654488048067e-14	24.3713472306617
FBXO5	0.411666610471754	0.99029771904097	8.29801867686867	2.00898304149829e-15	2.5924615944204e-14	24.3697467711666
PRDM4	0.36334263952854	1.86604830366733	8.29734412363584	2.01861756034083e-15	2.60166243384871e-14	24.3650607787055
CDK7	0.409089115953363	2.52631948882527	8.29358123279136	2.07320648162486e-15	2.6687074264088e-14	24.3389254684172
OFD1	0.347983315389583	2.10281848358623	8.29294475536238	2.08258321668178e-15	2.67654488048067e-14	24.3345055894312
TMSB10	1.71731515012216	8.52980091400049	8.33155990468158	2.19875834146592e-15	2.81983971001827e-14	24.3234994660101
EGLN3	0.65560564488158	0.951171827304008	8.28464291614022	2.20879722263653e-15	2.82922139935244e-14	24.2768765045918
RNASEH2A	0.795288185268463	2.80093811705855	8.28210247479384	2.2489100351291e-15	2.87705387252723e-14	24.2592493441469
DBN1	1.00827453009393	1.84259720179849	8.27919672595442	2.29567459548988e-15	2.93326785952631e-14	24.2390919862129
NLE1	0.451545607413412	1.5834132690827	8.27517284284236	2.36202559732313e-15	3.01433930036766e-14	24.2111860524692
ST3GAL6	-0.595116476640204	1.85862569099299	-8.27308497926875	2.39719656485597e-15	3.0554696829109e-14	24.1967102186634
NPM1	0.737189022983876	5.63341324900935	8.26943470101432	2.45993539249472e-15	3.13159422270038e-14	24.1714076653065
RPS7	0.686403054053289	5.51338772709705	8.26874745757422	2.47192763012406e-15	3.14300908466693e-14	24.1666447702363
NAGPA	0.37113927865607	2.08894450264094	8.26663747134118	2.50910872876643e-15	3.18638404332832e-14	24.1520233442506
ACIN1	0.421201885720397	2.89555022711875	8.26480175207403	2.54190627146684e-15	3.22409308278358e-14	24.1393045660115
PES1	0.540336537524831	3.56431951476004	8.2618235732648	2.59601924888484e-15	3.2887131655385e-14	24.1186743745503
CCDC93	0.368316749783633	1.71941534216089	8.25803192284311	2.6665636490502e-15	3.37396628335365e-14	24.0924165427698
PQBP1	0.575567321463099	4.3002165027269	8.25770550811775	2.67272452779499e-15	3.37551578541373e-14	24.0901564507991
ZNF589	0.233720127618312	0.944301978588785	8.25762283577849	2.67428714997641e-15	3.37551578541373e-14	24.089584038149
VDAC2	0.422470160820342	3.59972203800912	8.25691711104634	2.68766314664901e-15	3.38828213196479e-14	24.0846978507065
ZNF133	0.291090335109747	1.41656566251512	8.25462757421804	2.73151504842105e-15	3.43939131187853e-14	24.0688478816669
KCMF1	0.242499019095658	2.76974672710356	8.25402775470448	2.74311995635255e-15	3.4498220468027e-14	24.0646959588805
SNRPF	0.533347137579578	3.32983636825367	8.25153554101647	2.79186192231294e-15	3.50687565284001e-14	24.0474471872075
TBC1D13	0.528752217476032	2.76747705037157	8.25055218987666	2.81132872257555e-15	3.5270631364873e-14	24.0406423333701
TPRKB	0.383705495346748	2.81462096089918	8.25005469159845	2.82122845046579e-15	3.53521364818319e-14	24.037199824826
ZNF195	0.311695369322963	1.6017558492089	8.24809297239222	2.86060175199386e-15	3.58023265056773e-14	24.0236268236478
HMMR	0.560118344231682	1.62535216846361	8.24395038924423	2.94554038265395e-15	3.68210270698065e-14	23.9949718502374
TMEM165	0.448084675204285	2.14521198235416	8.23921020211425	3.0457942172951e-15	3.80284979919009e-14	23.9621952669947
PIGC	0.471835724076381	2.48498893098318	8.23783782023264	3.07544435430269e-15	3.83526001830688e-14	23.9527081866137
SHC1	0.682540741321906	4.47365822191823	8.23759345147034	3.08075375823411e-15	3.83727458519615e-14	23.9510190140038
QRSL1	0.306764109517907	1.83230987888086	8.23516870623269	3.13392974131616e-15	3.89883379075356e-14	23.9342600899417
WDR77	0.406412473242133	2.67446743907644	8.23110351166201	3.22512489229149e-15	4.00748772501484e-14	23.9061706034721
C1orf159	0.270978837343037	1.07034265390199	8.23066733976397	3.23506409435549e-15	4.01503534195518e-14	23.9031573298845
DKC1	0.522389430848048	2.99037524228305	8.22813807038713	3.29329921632242e-15	4.08243344381352e-14	23.8856861513603
TXNL4A	0.442476253776775	2.96428522731533	8.22590410910148	3.34559615596947e-15	4.14231857785589e-14	23.8702579122971
DHX57	0.289853381791324	1.43718774426492	8.22498998103445	3.36723179668947e-15	4.16414332190598e-14	23.863945568636
C12orf43	0.230691924623583	1.56366624846212	8.22416178561631	3.38695296931744e-15	4.18355142036499e-14	23.8582270335538
TMEM51	0.798769428914962	1.62346584063201	8.22028485415749	3.48080022815843e-15	4.29436493706767e-14	23.8314628097228
ITGB3BP	0.284953985237195	1.65003799610584	8.21633839016208	3.57897038696949e-15	4.41024251243642e-14	23.8042274869762
PELO	0.473483811771769	2.1768313546219	8.20938670344663	3.75859804029727e-15	4.6261038439109e-14	23.7562744242136
NIF3L1	0.361847828107545	2.90507211703226	8.20920653376865	3.76337009671059e-15	4.62649568812185e-14	23.7550319767595
GCDH	-0.798187022056876	3.17398383827886	-8.20713420902246	3.81869112808349e-15	4.6889554891881e-14	23.7407426057797
ZRSR2	0.323765635761265	2.00791565230281	8.2063235768399	3.84054913633687e-15	4.71022720522638e-14	23.7351537022478
RAB11A	0.390153238179252	3.46550422005381	8.20482148063984	3.88137929450897e-15	4.75468963577349e-14	23.7247985051468
ZNF239	0.437645382692199	0.80655299253609	8.20388691423714	3.90699901569318e-15	4.78043648704603e-14	23.7183564213864
CCDC9	0.419237142154684	2.37933921535049	8.20292839249791	3.93344907711791e-15	4.80713753095304e-14	23.7117497356086
EXOC3	0.347721099004401	2.46230176674525	8.20264624838458	3.94126840634725e-15	4.81103363162577e-14	23.7098051366343
DYNLT1	0.476880159322819	3.43343648236353	8.20083380562527	3.99186602227822e-15	4.86707796237396e-14	23.6973144833916
PRR13	0.473693751621847	3.95420709280201	8.19972253292742	4.02320618667171e-15	4.89953878864545e-14	23.6896569631463
TBCB	0.552422528613174	3.21773712146139	8.19548223718718	4.14504174729389e-15	5.04200160080667e-14	23.6604446485101
PPP4C	0.487647257603887	4.43067288581961	8.1948474889324	4.16359097091592e-15	5.05864128723679e-14	23.6560726268343
AXIN1	0.425842672793976	1.92405561903676	8.19433115719783	4.17874021193172e-15	5.07111604223677e-14	23.6525164071632
TNFRSF4	0.510720645597411	1.28753418738172	8.19402112219884	4.1878628462483e-15	5.07625662156679e-14	23.6503811244414
ARFIP2	0.383963717791662	2.89239763094275	8.19363806897844	4.19916119780539e-15	5.08401940825202e-14	23.6477430252778
GLMN	0.286277644132707	1.30194715714449	8.18930675852103	4.32903094017021e-15	5.23515406361911e-14	23.617919076869
VPS33A	0.310684897089143	1.68264197068695	8.18824349737104	4.36151386161795e-15	5.2683030226148e-14	23.6105994807376
TRIM45	0.398960400025232	0.98778458296411	8.18740488388703	4.38730357699009e-15	5.29329960020592e-14	23.6048268441267
RCE1	0.408658967994863	2.00770082240942	8.18446188208843	4.4790074962505e-15	5.39767167877612e-14	23.5845717764834
RBM28	0.230768580538947	1.33791340528534	8.18087843670064	4.59322873807425e-15	5.52890615656029e-14	23.5599156724034
HSD17B4	-0.800879041147152	4.48882121639307	-8.17881300326876	4.69206119418416e-15	5.6413346857853e-14	23.5398041948654
GNL3	0.531377449239264	3.69398376190189	8.17424456359818	4.8123312756512e-15	5.77924824178783e-14	23.514290600567
PRPF19	0.426572643800537	4.70374708144732	8.17355124497671	4.83581790089475e-15	5.80074784693934e-14	23.5095237135352
PHLDA2	1.32555172246098	1.86361159018273	8.17222566125893	4.88103874903924e-15	5.84823881488116e-14	23.5004104883645
IQCB1	0.399789564318711	1.82851578387354	8.17070373779716	4.93347309728279e-15	5.90425328739327e-14	23.4899487109573
CAPNS1	0.553054080039354	5.39280801692608	8.16890028765703	4.99632790579082e-15	5.97259542984523e-14	23.4775534483251
RPL17	0.440050428562917	3.2981570251129	8.16716802609118	5.0574466287295e-15	6.03870753784392e-14	23.4656492513012
CDC42SE2	0.543075427151933	2.35571110128177	8.16560448773966	5.11324652062953e-15	6.09832432334093e-14	23.4549060279806
NMB	0.736430893447269	1.93199036476222	8.16172804642117	5.25422785676598e-15	6.25545578089872e-14	23.4282767585564
UBE2E1	0.459739511594025	3.21639360308066	8.16165178019125	5.25703975425932e-15	6.25545578089872e-14	23.4277529343016
NOL8	0.259216730646786	1.91227929489996	8.16139795937347	5.26640871614592e-15	6.25943406674186e-14	23.426009624826
ARMC9	0.214607699275136	0.526905211239034	8.15454302040767	5.52577249306284e-15	6.56019710376421e-14	23.3789422499056
DNM1L	0.408255142425642	2.28781272390886	8.15259977182634	5.60156685198595e-15	6.64258863680709e-14	23.3656044972958
PRPF31	0.513052330940448	3.75214942632439	8.1511593877334	5.65840970932293e-15	6.7023443626507e-14	23.3557196438334
LSM4	0.660282563495497	4.39302496886758	8.14941542018038	5.72799650732667e-15	6.77704188133365e-14	23.3437530212886
TMEM106C	0.76981312591653	3.6805596878071	8.14808832708838	5.78151547768282e-15	6.83258052129341e-14	23.3346480637576
NOL12	0.263060102508345	0.982762048039685	8.14668431981983	5.83867427474959e-15	6.89228958705668e-14	23.3250165291029
DPF2	0.311709333609741	2.01701532488371	8.14636916328238	5.85158122305051e-15	6.89431318582326e-14	23.322854703168
THUMPD2	0.28218949540746	1.36935264804561	8.14631841665749	5.85366213890654e-15	6.89431318582326e-14	23.3225066105523
PRKRIP1	0.366651099547684	2.49995912235726	8.14596572328361	5.86814490053649e-15	6.90354351379084e-14	23.3200873786552
WTAP	0.446049169404143	2.59524406146206	8.14544362547778	5.88964900676726e-15	6.91910516924605e-14	23.3165062830442
HAGH	-0.838290744736465	3.98019152239976	-8.1462753115444	5.89469394954058e-15	6.91910516924605e-14	23.3164034979149
DYNC1LI1	0.314380637708495	2.06253103503217	8.14194845487124	6.03562713720196e-15	7.07653439066071e-14	23.2925368238312
PPP5C	0.430096481726218	2.42739097869277	8.14157590510714	6.05139624823214e-15	7.08702415181911e-14	23.2899823427326
DDX11	0.367628976146672	1.37206013835381	8.13413204736505	6.37514995039884e-15	7.4577767662999e-14	23.238958642333
ACAA1	-0.806383234463363	3.92046946982506	-8.13220802331528	6.46157821023563e-15	7.54887606663115e-14	23.225775739581
CLEC3B	-0.969572470609983	2.17002257691088	-8.13207583684624	6.46755843213489e-15	7.54887606663115e-14	23.224870112329
CBX4	0.671028681695679	3.07038453555803	8.13117736534748	6.50835119268084e-15	7.58796320870579e-14	23.2187148339479
PABPC4	0.517678488776232	3.68393631708712	8.12765111033913	6.67092351878221e-15	7.76878402613337e-14	23.1945616080162
PRR7	0.53193578490592	1.04741618613674	8.12577484432408	6.75905486967872e-15	7.86260492566881e-14	23.1817130108852
SH3GLB2	0.480603924761188	2.30291391457176	8.12432269607013	6.82805370063771e-15	7.93398454611013e-14	23.1717701688551
MED28	0.314056291984086	1.80298742560254	8.12409819264872	6.83878292618214e-15	7.93468209548041e-14	23.1702331066317
ZFP64	0.257528520236362	1.52484838808194	8.12399060279272	6.8439306483928e-15	7.93468209548041e-14	23.1694965033471
PRKD2	0.387288876381863	2.6416636200088	8.12153321915955	6.96255424895901e-15	8.06321221161496e-14	23.1526741133034
RGN	-1.11408149423273	4.64628508771881	-8.13603673627365	7.17994774725813e-15	8.29647354822219e-14	23.1372346212226
QDPR	-0.857335434380592	4.31490236070855	-8.1173407607935	7.16964184680013e-15	8.29379059070822e-14	23.1239821636264
ACRV1	0.0929269531363295	0.314919128542153	8.11649795571276	7.21200136900976e-15	8.32425224680816e-14	23.1182154958976
PDLIM7	0.681712900714332	1.96652435464356	8.11419358843394	7.32908589412011e-15	8.45000491322084e-14	23.1024506037936
RAD51AP1	0.50090400803885	1.36645227460648	8.10905150131013	7.59716965117799e-15	8.74937897299744e-14	23.067283201984
UBE2D1	0.399739349799981	1.87752794479801	8.10790007387267	7.6585147701432e-15	8.81026040224225e-14	23.0594105630241
SAFB2	0.334783703372092	2.72352550460208	8.10699664263014	7.70698975916464e-15	8.85621787811972e-14	23.0532340890379
RBM22	0.316280816351253	3.07916231492305	8.10666082547181	7.72508573564277e-15	8.86720338363062e-14	23.0509383351845
EIF2B1	0.33406755604765	3.2892533242004	8.10643206233954	7.73743699283606e-15	8.87157786772417e-14	23.0493744748593
RUVBL1	0.367225492189141	2.28897104711817	8.10471195191341	7.83093540236081e-15	8.96888169346462e-14	23.0376165152679
LASP1	0.632288536193823	4.59251759471472	8.10363282657853	7.89016139456782e-15	9.02676173642847e-14	23.0302409487596
MPP3	0.308584933200498	0.800007800133405	8.10138027794121	8.01521872051684e-15	9.1597461021704e-14	23.0148475119738
R3HDM1	0.293722055355912	1.70853990484882	8.10097312217539	8.03803135094471e-15	9.17572194215535e-14	23.0120654139236
CPEB3	-0.42080129413857	0.951434338078488	-8.09823520007314	8.19311018853546e-15	9.34248393397435e-14	22.9933596999315
HSBP1	0.321747607743075	2.63791440453761	8.09750198849016	8.23513955984183e-15	9.38011291092511e-14	22.9883510834379
LAMC1	0.868149313837681	3.50990952338646	8.09183265810275	8.56739184915242e-15	9.74787147086476e-14	22.9496341686102
KCTD7	0.232594611664634	1.17453497767655	8.08948332962015	8.70892528241888e-15	9.89806518969008e-14	22.9335956973186
NME1	0.672501859068164	3.61810109598158	8.08450528089323	9.01650250924264e-15	1.02364402257937e-13	22.8996221098401
SLC38A1	0.79170467948313	1.9463555265235	8.08413296353809	9.03993349571501e-15	1.02518372438305e-13	22.897081748596
ITM2C	1.31381313499418	3.43902145660986	8.09466161126777	9.23233748580269e-15	1.0458617426665e-13	22.8924016775449
ATG7	0.203923775231263	1.54256672603842	8.07869420600611	9.3891478833343e-15	1.06246697398776e-13	22.8599818148542
GRN	0.686737511306911	5.84104540355607	8.07847073133838	9.4037784523401e-15	1.06296464159857e-13	22.8584577771654
CS	0.538592807294851	3.44290160693269	8.07543364268089	9.60485990902197e-15	1.08451396451e-13	22.8377485550737
BCL10	0.362196296880064	2.1312382652975	8.07474465071664	9.65106503747959e-15	1.08854792192549e-13	22.8330512297746
FLOT2	0.674459077786771	4.37620626675941	8.07390912752845	9.70739156176719e-15	1.09371348745811e-13	22.8273552766614
TFE3	0.457585774907094	3.05973844274723	8.07169640243276	9.85813565436906e-15	1.1088971454768e-13	22.8122726078113
TOPBP1	0.40545755993859	2.17358843744336	8.07161819664445	9.86350560666693e-15	1.1088971454768e-13	22.8117395839391
PRR3	0.355251958724066	1.62589831788405	8.07087373425444	9.91476858110652e-15	1.1134553083301e-13	22.8066657635462
RENBP	1.12591998637121	1.64208775559579	8.06854635441251	1.00767336233975e-14	1.13042234211505e-13	22.7908058085337
ING2	0.396593697027166	1.97206229914166	8.06821243255607	1.01001850609973e-14	1.13183087824854e-13	22.7885305561683
PACS1	0.57920446587335	1.99577264954887	8.06763969083896	1.01405345250206e-14	1.13512793799477e-13	22.7846282034299
RELB	0.707410041998038	2.57570107765282	8.06254068088587	1.0506850892231e-14	1.17486724508607e-13	22.7498948242298
SLC2A2	-1.19030997953345	5.79834508392894	-8.1030537112506	1.0936028797116e-14	1.21892132129229e-13	22.7472642584674
GTF2H1	0.298760761938839	2.12011275250794	8.05874690358936	1.07878521023792e-14	1.20375401933033e-13	22.724062358344
PRKRA	0.304744466859635	2.31153522043807	8.05874011537683	1.07883614939983e-14	1.20375401933033e-13	22.7240161438736
GHR	-0.926557552186734	2.33067978320332	-8.05600301623813	1.09957037150447e-14	1.22425905886264e-13	22.7053840592224
CSNK1E	0.535341051253885	2.57430234530709	8.05440340265396	1.11186961930664e-14	1.23662758087338e-13	22.6944971556418
NCAPH2	0.619175353893757	3.22659781693461	8.05142117774504	1.13516361633539e-14	1.26118498892963e-13	22.6742042890113
SHMT1	-1.3130744249613	3.92790226673008	-8.06451335655183	1.20353573572077e-14	1.33287091926091e-13	22.6342193963077
ADRA1A	-0.521092244875919	0.633766928320585	-8.04538998998506	1.18375632525223e-14	1.31376716952138e-13	22.633180479348
NSUN5	0.397017880272807	2.84516320171563	8.04337539604116	1.20044118636327e-14	1.33086265143454e-13	22.6194821089963
POP4	0.273760658823881	2.4650630387977	8.04213759903742	1.21080762524587e-14	1.33949623120917e-13	22.6110668125318
RPL23A	0.80518857293875	6.05142280846569	8.0408936849476	1.22131438335178e-14	1.34968232066577e-13	22.6026108407448
EIF4A3	0.436190187614072	3.3057699054269	8.03881432066815	1.23907928798107e-14	1.36785926073829e-13	22.5884776261563
CALU	0.711628288284372	3.71595911809275	8.03595605519377	1.26391597937794e-14	1.39379609275776e-13	22.5690544771251
POLR2D	0.345142232301621	2.42533341094038	8.0331764155985	1.28854097741622e-14	1.41944471616116e-13	22.5501702601163
VPS54	0.427957474838844	2.57588865867083	8.03132638361821	1.30519261957228e-14	1.43626492924966e-13	22.5376041125296
FKBP11	0.684702530864616	3.15746350474441	8.0307343303284	1.3105663000098e-14	1.44065214015892e-13	22.5335830807257
YWHAH	0.594242476377216	4.55128494695297	8.02932882928147	1.3234108014413e-14	1.45323376378142e-13	22.5240382094908
UXS1	0.390610659053176	2.36400930429646	8.02652747775137	1.34938369480419e-14	1.48018984388869e-13	22.505017493643
NEU1	0.703396573257034	4.04508066169668	8.02467369985083	1.36684731724232e-14	1.49776476070815e-13	22.4924332022027
GTF3C3	0.280007773024843	1.82056103973252	8.02374323765562	1.37569676052182e-14	1.5058733349105e-13	22.4861175669908
CRNKL1	0.347141992367393	2.53952995801837	8.0232459588976	1.38044946469482e-14	1.50948516202629e-13	22.4827424319736
IMPDH2	0.688144546118545	4.47365393149485	8.02125358360851	1.39965466767758e-14	1.52887620271658e-13	22.4692212334951
VEZF1	0.431061938052053	2.33286822032894	8.01933526024081	1.41839538903617e-14	1.54771967450711e-13	22.456204809378
SARS2	0.288104272353067	1.43366244095716	8.018948268958	1.42220597082074e-14	1.55024927858193e-13	22.4535792168893
HIF1AN	0.3076587377776	1.47230680527051	8.01865436067214	1.4251067487496e-14	1.55178290419401e-13	22.4515852173717
DCLRE1B	0.318485047249645	1.22101981683374	8.01549979847191	1.45661163703566e-14	1.5844274016258e-13	22.4301865433049
BICD1	0.192506755065714	0.721446139504511	8.01376894114407	1.47418915968628e-14	1.60186997811936e-13	22.4184479439639
BLMH	0.742661002858159	2.09257046236543	8.01067306492368	1.50615308360319e-14	1.63489218730093e-13	22.3974562783205
MTHFS	-0.709843341868011	3.10686318450295	-8.00737663736214	1.54094036278955e-14	1.67090694036094e-13	22.3751110221543
DPH2	0.48294349403993	2.62362283796721	8.0068864049729	1.5461811435489e-14	1.67484147228217e-13	22.3717884701671
ZNF544	0.290765561591875	1.94523392808275	8.00629296877291	1.55254877596645e-14	1.67998715466036e-13	22.3677666448596
PCBP4	0.557529540891198	2.50194034537535	8.00059076890264	1.61506955069431e-14	1.74582127914803e-13	22.3291324577165
MKNK1	0.225472849645336	1.94092485055121	7.99862168557569	1.63723175529104e-14	1.76655730413267e-13	22.3157957898689
ADSL	0.410932845182662	2.96564230351266	7.99858445055868	1.6376537195608e-14	1.76655730413267e-13	22.3155436180419
SCAMP4	0.438777822762243	2.53807717370663	7.99840363131633	1.63970437403957e-14	1.76693454746089e-13	22.3143190427351
SENP3	0.364706643303567	1.84012151011011	7.99528191033461	1.67551007838545e-14	1.80364753308477e-13	22.2931806491087
SIRT6	0.452102385033836	2.28277196712529	7.99464909139917	1.68286202016914e-14	1.80968640429783e-13	22.2888962909564
RIBC2	0.455981509840616	0.684873550549972	7.99425236009921	1.68748739240707e-14	1.81278376756201e-13	22.2862104324469
TEX10	0.301380439000179	1.53388902424105	7.99109916436065	1.7246988608162e-14	1.85084419071887e-13	22.2648667247198
IVD	-0.725207822044398	3.7472972975621	-7.98846298516082	1.75643009716173e-14	1.88295106804087e-13	22.2470271969841
P2RX4	0.449181128942505	2.08384517616317	7.98763521619982	1.76651226187236e-14	1.89180715219898e-13	22.2414263796563
CYBA	1.51592276673569	2.68599730653559	7.98600237806244	1.78656799709596e-14	1.91131496949875e-13	22.2303795311593
DDX54	0.396119705349153	3.34568132551248	7.98389117298967	1.81283310121486e-14	1.93741875055761e-13	22.2160986787085
PDCD5	0.557674623458267	3.88320538308532	7.97894003672853	1.87593464646479e-14	2.00279641392356e-13	22.1826180548266
STT3A	0.508213373922047	3.90733155019847	7.97710041994442	1.89992899201819e-14	2.02633083871509e-13	22.1701819010629
NAT2	-1.20274693203394	1.32739680480989	-7.97486898621954	1.92944100155414e-14	2.05569570504045e-13	22.1550996987257
DDOST	0.56923095426425	5.43591438628465	7.97426750288793	1.93747314268134e-14	2.06213842276371e-13	22.151034796487
CAPZA1	0.564013421177849	3.65187026282836	7.97130087710206	1.97757483371252e-14	2.10266605656148e-13	22.1309891112868
NKIRAS2	0.390314867497394	2.65299570697461	7.97016518475974	1.99314272535426e-14	2.1170518027587e-13	22.1233165529221
MID1IP1	0.908304077744388	3.65490989141113	7.96865250583223	2.01406641500034e-14	2.13709110510966e-13	22.1130983275945
SEC61G	0.606109111358101	4.32389214471403	7.96840070015562	2.01757044398844e-14	2.13862467062774e-13	22.1113974996146
PDAP1	0.422646586814557	4.3596324338565	7.96808787638263	2.02193196434235e-14	2.14106312391318e-13	22.1092845760151
GTF3C5	0.492502633035064	3.13304299038999	7.96715430973147	2.03500358303707e-14	2.15271051126162e-13	22.1029792802683
PIP5K1C	0.404380422060834	1.99157199380345	7.96645193833948	2.04489303775125e-14	2.16097140144049e-13	22.0982358168385
SETD1A	0.350636884214146	2.01701319933211	7.96494046822375	2.06633594281288e-14	2.18141237540042e-13	22.0880291057985
BCL7C	0.507915912251335	2.49776180251365	7.96387799184283	2.08154184048122e-14	2.19523417653999e-13	22.0808551924214
CBX8	0.401248753842302	1.63574565810146	7.96047254012955	2.13102849595124e-14	2.24514442352348e-13	22.0578658914031
EXOSC1	0.403932589838884	2.17770998041847	7.95954536390087	2.14470191734126e-14	2.25726074137194e-13	22.0516079702351
MICAL1	0.535711457492612	1.48958329366889	7.95869933189946	2.15725426085317e-14	2.26817381191728e-13	22.04589817531
HSPBP1	0.530317084141128	3.72225899549306	7.95843172778326	2.16123971353382e-14	2.27006654642966e-13	22.0440922278873
FANCF	0.329434644085043	1.92474540111399	7.95464355094218	2.21844364495259e-14	2.32779723068359e-13	22.0185320088339
SLCO2B1	-1.34001579060572	3.19444077865109	-7.95281717032025	2.27437413767029e-14	2.38407654309979e-13	21.9956771310748
ATP6AP1	0.49260602423429	4.34677864397784	7.94922685181795	2.30284583790078e-14	2.41148816170497e-13	21.9819984549438
SLC7A6	0.248681393862647	0.816110844968674	7.94849694196805	2.31445898980226e-14	2.42120845781127e-13	21.9770768350321
RAD54B	0.226537707466052	0.865529962368065	7.94794792715602	2.32323212664595e-14	2.42794118024126e-13	21.9733751601719
ACAT1	-0.860717119130722	4.73702216965786	-7.94895860439767	2.33562670014646e-14	2.43735209807574e-13	21.9696764708387
ZNF408	0.337516992948411	2.38607777288979	7.94709481934806	2.33692981294131e-14	2.43735209807574e-13	21.9676235279424
DDX31	0.232427377116385	1.54985810933326	7.94597408859265	2.35504579208752e-14	2.45378291757323e-13	21.9600682500441
IL27RA	0.560317716340284	1.32628112747406	7.94458667906109	2.37766470427753e-14	2.47486783046443e-13	21.9507162289096
MRPS12	0.634853706235325	3.69784636012571	7.94412224778506	2.38528414429694e-14	2.48031348257824e-13	21.9475859245928
ZWILCH	0.346266328004918	1.40706056245105	7.94308668289215	2.4023605159913e-14	2.49557210401177e-13	21.9406065984371
RUVBL2	0.489667017541856	3.93414922232421	7.94160478785248	2.42700702523081e-14	2.51865624156819e-13	21.930620288014
SART3	0.355440948075759	2.25506453375152	7.94110753292037	2.43533307011922e-14	2.52477444435114e-13	21.9272696421121
UIMC1	0.271154913229896	1.98440673990782	7.93979698200883	2.45741234151306e-14	2.54512456666378e-13	21.918439484697
CWF19L1	0.338200858554933	2.01883332032269	7.93823392676143	2.48400424348804e-14	2.57010319535396e-13	21.9079093624782
THAP11	0.395844830875753	2.74719254890269	7.93650650837638	2.51372306846508e-14	2.59826420250898e-13	21.8962736471532
ACYP1	0.320213100198199	1.34429356065011	7.93565671625932	2.52847163570389e-14	2.61091086994951e-13	21.8905501895324
RUFY1	0.350458056156314	2.78319745561234	7.93110683451139	2.60890277107743e-14	2.69128917437461e-13	21.859913520649
PSMD2	0.481067512471477	4.2907877293253	7.92893511925761	2.64817927861487e-14	2.72909586768366e-13	21.8452946321202
MPDZ	-0.56951069029408	2.18006676279871	-7.92595943051804	2.70294576974213e-14	2.78277508979993e-13	21.8252683936541
GAL3ST1	1.31531569370956	1.35725392424937	7.92294097371539	2.7596419259654e-14	2.83833270563649e-13	21.804959755377
ACTL6A	0.507711930271625	2.58663099670852	7.91821760463496	2.85072687960984e-14	2.92911481952393e-13	21.773191180606
PEBP1	-0.824339747197806	8.54891181619909	-7.91743760858183	2.95484159705222e-14	3.02790772852928e-13	21.7419098330107
TGIF2	0.633795863748077	2.21798382915508	7.91332353020294	2.94823526839741e-14	3.02631106404272e-13	21.7402886032072
AMZ2	0.374172276474115	2.76423436602091	7.91295939985913	2.95562036650817e-14	3.02790772852928e-13	21.7378411512389
CENPN	0.409597900428314	1.54213863315834	7.91232861246546	2.96845691759067e-14	3.03806211427901e-13	21.7336015891857
GPATCH4	0.560052905229542	2.60979625251864	7.91176353703775	2.98000296635473e-14	3.04687704867056e-13	21.7298038844666
COL18A1	-0.840999734431106	5.77402356144365	-7.91435296909857	3.03674272498213e-14	3.10183711181066e-13	21.7159392983438
HSD17B6	-1.46829894552519	6.49035195745797	-7.96822262188175	3.22457430513095e-14	3.27758100603721e-13	21.7096209554621
UBTF	0.407557605711498	3.31389514287474	7.90874360950443	3.04246431905154e-14	3.1046286194801e-13	21.7095110988854
B3GNTL1	0.291934942611245	0.907356045190552	7.90168780984797	3.19348323647328e-14	3.25501806440087e-13	21.6621201341174
TMEM164	0.463348260167973	1.68930485935039	7.90156804970964	3.19610938167972e-14	3.25501806440087e-13	21.6613160119819
OAZ1	0.634104912754644	5.94021257532953	7.90086671969601	3.21153127388359e-14	3.26752075152818e-13	21.6566071477024
POGK	0.468815135191642	2.54256183972633	7.89537794097201	3.33479174048063e-14	3.3862968328556e-13	21.6197646600119
RGS2	1.14185896930675	2.17777896411347	7.89288247875941	3.39236546281222e-14	3.44139574489193e-13	21.6030202958946
DNMT1	0.536922912776404	2.1555315428293	7.88960923077209	3.46937402871122e-14	3.5160836497807e-13	21.581062735442
EIF2B4	0.311817533379763	2.66463012114847	7.88655454654126	3.54279637883086e-14	3.58699500811842e-13	21.5605771663555
KPTN	0.44955082678259	2.18111059794179	7.88577625019451	3.56174744081301e-14	3.602671121243e-13	21.555358592004
KATNA1	0.34075769163165	2.07768961563615	7.88041402257888	3.69506279302484e-14	3.73388251886596e-13	21.5194141139814
CTBP1	0.364116020736731	3.4207851277838	7.87761229393738	3.76666670672541e-14	3.80253972297993e-13	21.5006402605676
SUCLG2	-0.672770122441021	4.59850385257621	-7.87311870065111	3.88438057094052e-14	3.91756751174079e-13	21.4705394365167
TNIP2	0.435219853212987	3.07732687647299	7.86892166657146	3.99760280105406e-14	4.02784654678464e-13	21.4424361605893
GTPBP2	0.593885869514915	2.61323304171621	7.86726131170767	4.04328779527551e-14	4.06992961408159e-13	21.4313213877947
RPL5	0.687843614364789	6.81192996121366	7.86195955916116	4.1926451123484e-14	4.21618561733545e-13	21.3958414710657
COMMD8	0.436466668522506	2.37032654604742	7.85917817750914	4.2731654033575e-14	4.29300214797657e-13	21.3772349538836
NPC1	0.419027140179475	1.99568794903088	7.85744133127876	4.3242190278723e-14	4.34009538758816e-13	21.365618404601
RPS21	0.943302382927928	7.10794586069614	7.85630494851197	4.35794777894046e-14	4.36972601618084e-13	21.3580189231843
RPL23	0.721601033320276	5.6094990346075	7.85591630182785	4.36954262402905e-14	4.37712717246035e-13	21.3554200546223
STARD7	0.413054929878424	4.26605244042092	7.85456831411369	4.40999485996569e-14	4.41339369993484e-13	21.346406810202
ARHGAP1	0.505664481805372	3.14329391206702	7.85013039803879	4.54580391953433e-14	4.54492888509361e-13	21.3167407054594
TIMM9	0.427017624604529	3.29345634013822	7.84982212374483	4.55538963054373e-14	4.55013341173925e-13	21.3146804295825
TLE3	0.460372129434231	1.39144197325679	7.84673742688996	4.65241315186743e-14	4.63970418659475e-13	21.2940677823794
TOE1	0.29392626896101	1.94436857051103	7.84668760945954	4.65399669082762e-14	4.63970418659475e-13	21.2937349382622
PRIM1	0.509061024179219	2.0027340446124	7.84650203125838	4.65990032089587e-14	4.64113562161709e-13	21.2924950518877
UBE2N	0.322281149522011	2.8396451992481	7.84098917687846	4.83868781217016e-14	4.81458706827812e-13	21.2556720506741
WDR76	0.522020522147163	1.13143447616867	7.83683460166757	4.9778838681964e-14	4.94835001175351e-13	21.2279338246297
RPS3A	0.691286091414624	5.65000208266189	7.83536990668625	5.02789392969361e-14	4.99328509958482e-13	21.2181572128296
NPEPL1	0.26534183533205	1.33118477002187	7.82887870254706	5.25556368936873e-14	5.21440263659621e-13	21.1748451039304
SERPING1	-1.1036195550711	8.1584881399737	-7.83665570230806	5.32241200135723e-14	5.27568853722317e-13	21.1710778807645
ZNF84	0.269614198254643	1.46116237407202	7.82617347878213	5.35342294502371e-14	5.30136868950489e-13	21.1568022392187
STARD3	0.425430202478132	2.82962055158798	7.8256391014631	5.3729652854314e-14	5.31565365572013e-13	21.1532386614431
PLCB1	0.352992185093516	1.19277906812154	7.82266851422185	5.48289128250509e-14	5.41924592223243e-13	21.1334320042233
CYP4F3	-1.11918394079402	4.07054065781346	-7.83116515506166	5.55871370189854e-14	5.48896558320552e-13	21.1294066618499
METTL7A	-1.04497711975677	5.97791096158535	-7.82710392625384	5.57677518038197e-14	5.50157080473009e-13	21.1230335903871
VPS35	0.423986402475107	2.49316058558665	7.82003310729394	5.5822705826377e-14	5.50176724975716e-13	21.1158646813507
MPPED1	-0.608129997202647	1.00744566265749	-7.81891113377043	5.62511709734695e-14	5.53304701921025e-13	21.1083870148473
GNAO1	-0.437870012321757	0.777821100239382	-7.81882449118236	5.62843932041922e-14	5.53304701921025e-13	21.1078095959987
TCP1	0.565276047120446	4.07900916889081	7.81878414028416	5.62998719609668e-14	5.53304701921025e-13	21.1075406839692
ERCC3	0.31196133124111	2.06710376029219	7.81830384364095	5.64844385601296e-14	5.54593901476963e-13	21.1043399007641
MAST2	0.429981305283182	2.01376002378115	7.81702522707486	5.69786970184784e-14	5.58918512396557e-13	21.0958196538438
SMYD3	0.32527870212877	1.51980201202012	7.81542304337196	5.76040628250214e-14	5.63598393495013e-13	21.0851446739771
PDE2A	-0.332463579213063	1.10804457276355	-7.81541920644627	5.76055685595879e-14	5.63598393495013e-13	21.0851191113019
TMEM183A	0.345700641457315	2.67527980311089	7.8153861319947	5.76185496622741e-14	5.63598393495013e-13	21.0848987603986
KIAA0319L	0.422013457524866	2.82997768629687	7.81254436398865	5.87447399699312e-14	5.74073714776712e-13	21.0659686218127
SRCAP	0.440476340166802	2.04409702133118	7.81025294129291	5.96686293431201e-14	5.82554249639409e-13	21.0507081293994
GFRA1	-0.961362023594307	1.24148060537294	-7.80934258557814	6.0039647923179e-14	5.85626162090125e-13	21.0446461994621
UBOX5	0.26576415375954	1.55107091640972	7.80618354837548	6.13448729113136e-14	5.97796003567285e-13	21.0236145309486
XRCC3	0.311220188613346	0.94789735891574	7.80506121331168	6.18153007643501e-14	6.01815692914779e-13	21.0161439139238
EIF4E2	0.329282515317333	2.94922693712208	7.80487734069133	6.18927098962743e-14	6.02005122099717e-13	21.0149200727719
POLE3	0.473359892445241	3.5268797173693	7.8030307040777	6.26754568243764e-14	6.0904831196597e-13	21.0026301522605
CSNK2B	0.548467921323435	4.04643858940751	7.8015214632814	6.33224392064659e-14	6.14760278950251e-13	20.9925872449704
METTL4	0.232496430967351	1.0586320210045	7.80049207886072	6.37674933818482e-14	6.18503007703678e-13	20.9857382314261
MMP9	1.32006614547632	1.66856222500523	7.79975578566904	6.40877222500309e-14	6.21029159266158e-13	20.9808396977523
BFAR	0.326257805754242	2.96036082102798	7.79752607017038	6.50671839643524e-14	6.29932811762994e-13	20.9660074915947
TCERG1	0.290083635757927	2.14957256852395	7.79349003628726	6.68778405828237e-14	6.46859411521762e-13	20.9391672527392
ZSCAN2	0.307354872911595	1.21885843970015	7.79326304815821	6.6981136817216e-14	6.47255859774177e-13	20.9376580422543
YARS2	0.32805514526889	2.36443503388345	7.78877810392047	6.9054715236092e-14	6.66673217353646e-13	20.90784475821
EPS15L1	0.345343640663724	1.52561563721355	7.78629060955819	7.02319726214557e-14	6.77409221533595e-13	20.8913146441195
ABCC10	0.323526261690974	1.55358630402189	7.78014153989078	7.32278282554459e-14	7.0564998137066e-13	20.8504685250866
RAP1GAP	1.16206067909544	2.18987394984639	7.77982270862709	7.33865577212795e-14	7.06524153483458e-13	20.8483512703542
GTPBP3	0.310484482522058	2.01057880818529	7.77839971484248	7.40991421446876e-14	7.12723970925014e-13	20.8389023886866
HRAS	0.613721921943111	3.21839717720418	7.77825835182808	7.41703034930861e-14	7.12748485371118e-13	20.8379637856801
PUS1	0.391323948758072	2.2878907242994	7.77719773387644	7.470636842646e-14	7.17236372656254e-13	20.8309220277488
RFC5	0.445230480867162	2.07293479482344	7.77363823150889	7.65335404229697e-14	7.33752274168766e-13	20.8072944595542
TFPT	0.543072601042318	2.85184007490159	7.77357208006597	7.65679115516888e-14	7.33752274168766e-13	20.806855427188
RPS6KA4	0.38078514851485	2.5423545739878	7.7732623357952	7.67290520185249e-14	7.34618794809619e-13	20.8047997591754
POLR2G	0.435652850736462	3.89760082006015	7.77059797794693	7.81290434598008e-14	7.47333796924872e-13	20.7871197399406
NECAP2	0.36469613076548	2.70740072521793	7.76997974869798	7.84574795610575e-14	7.49785002465746e-13	20.7830179443166
TTF1	0.288279408903471	1.57333911501761	7.76699342461672	8.00632608723841e-14	7.6442753119699e-13	20.7632077278561
CLSPN	0.252844754262773	0.731604531408803	7.76359004168605	8.19328723890308e-14	7.8155985158609e-13	20.7406375451795
TTLL1	0.359639540317034	1.39315718894174	7.76227874793674	8.26646595931047e-14	7.8781695766346e-13	20.7319433431206
PPIE	0.31701493043756	1.99885607688995	7.75931758806664	8.43409931950832e-14	8.03056129523854e-13	20.7123139942146
ZNF205	0.416829858704848	2.23235235669019	7.7580745509627	8.50546422243468e-14	8.09109545262376e-13	20.7040755772992
LYRM4	0.29914503666718	1.87479114945657	7.75654041109764	8.59436389362247e-14	8.1681840921272e-13	20.6939091378693
CHORDC1	0.246843559573269	1.76102568383026	7.75229266360813	8.84532312627191e-14	8.39901431770682e-13	20.6657676868756
MORF4L1	0.379425133854984	3.87221975246818	7.74810367959685	9.09988948723141e-14	8.63284493090044e-13	20.6380263796714
DNAJB6	0.262551005820673	2.07570060582708	7.74747574663161	9.13866725841477e-14	8.66172221536612e-13	20.6338688570787
GOT2	-0.774164998940953	5.14595175466241	-7.74652145375274	9.19791170424131e-14	8.70992769222049e-13	20.6275509798606
MTRF1L	0.22410943835406	1.02649718106343	7.74591955381025	9.23547363157766e-14	8.73753188386418e-13	20.6235664004831
ZBTB24	0.25411095338388	1.15691985640545	7.74218992060856	9.47162186282428e-14	8.95279416842754e-13	20.5988811747466
RGS10	0.804458920792236	1.97437784792364	7.74177265480525	9.49840957317734e-14	8.96995260419693e-13	20.5961199595277
SORD	-1.16153146729838	3.92111567574009	-7.74282510751773	9.75626167891958e-14	9.20509049233575e-13	20.5746020354104
ERGIC3	0.420621221574109	4.48749043389834	7.73687869330062	9.81822883612242e-14	9.25515073953174e-13	20.5637426330188
CSNK2A2	0.335769657574912	2.55552134361851	7.73657894991834	9.83815871989187e-14	9.26552971733788e-13	20.5617600776297
C14orf93	0.273249490325602	1.382454863909	7.7337800059697	1.00261974350841e-13	9.43407055757737e-13	20.543250034854
NCAPG2	0.412269092539562	1.49308041223313	7.73330109297685	1.00587252143579e-13	9.44941409808131e-13	20.5400833583348
TBP	0.369262403933437	2.07865916265207	7.73327211185484	1.00606969507874e-13	9.44941409808131e-13	20.5398917333968
NDE1	0.287051399056985	1.15459730221058	7.73288100137844	1.00873435646652e-13	9.46588301262351e-13	20.5373057376728
TAF4	0.274810894940375	1.50935881116955	7.73253768493261	1.01107913298721e-13	9.47932313490177e-13	20.5350358302913
BUD31	0.434107474022628	3.40985310709331	7.73224841241224	1.01305897570378e-13	9.48932068495118e-13	20.5331233016862
PHTF2	0.288167712737557	1.21142629784614	7.73024147812851	1.02690059875225e-13	9.61030938724177e-13	20.5198558488359
TRIP10	0.586112959504699	2.13290310454931	7.72958706157391	1.03145426457384e-13	9.64423663401717e-13	20.5155301634004
NUP205	0.428515956602577	1.94927679735282	7.72924404317316	1.03384906347821e-13	9.65793531601767e-13	20.5132629211376
TIMM23	0.388214426924732	4.66079532537961	7.72531614102126	1.06166611150389e-13	9.90888370736966e-13	20.487305898401
RPL27	0.719260992286253	6.97418762049168	7.72470910873193	1.06603044465216e-13	9.94068604941353e-13	20.4832952522733
ENO2	0.624179430370494	0.915418034116943	7.72337521929166	1.07568289446897e-13	1.00216985719674e-12	20.4744830767555
SF3B3	0.418580625584607	2.52848255806708	7.72099107010747	1.09315065904587e-13	1.01753127653839e-12	20.4587352174745
WIPF2	0.352207267104053	2.1864024066605	7.71996064573971	1.10078654188201e-13	1.02372162910209e-12	20.451930107846
PGRMC1	-1.0166872944743	6.57293316229031	-7.72383767538225	1.10898415634366e-13	1.02950200322591e-12	20.4493549846681
PTP4A2	0.430770378788889	3.7356514114182	7.71954045302512	1.10391543415153e-13	1.02571319588247e-12	20.4491552664613
ADAM9	0.649560247906471	2.29753796331208	7.71771980559436	1.11757426723654e-13	1.03655013286189e-12	20.4371334489129
CKAP2	0.451851796824996	1.7716419407334	7.71689660097774	1.12380471788638e-13	1.04139905525456e-12	20.4316984615241
JARID2	0.329224797497374	1.67047860450038	7.7120636117869	1.16108070267501e-13	1.0749827396959e-12	20.3997983666304
STX7	0.278075986915842	1.59238686316919	7.71076753852806	1.17128283823957e-13	1.08346270023443e-12	20.3912460955285
PPP1CA	0.458449194322246	5.09334337935484	7.70936339937712	1.18243545666085e-13	1.09280600745488e-12	20.3819819089352
VPS33B	0.248317928114075	1.86064751429173	7.70513634698514	1.21664591378294e-13	1.12342380021131e-12	20.3541001278853
RBM8A	0.422914437291463	3.53376400676397	7.70474007141694	1.21990268815857e-13	1.12543065049655e-12	20.3514868456223
TSC1	0.283305779190397	1.79806572113521	7.70325162575118	1.23221243105118e-13	1.13577841470804e-12	20.3416719941447
DCP1A	0.291290569777908	1.68368390114789	7.70162709541531	1.2457875243893e-13	1.1472731208649e-12	20.3309613563388
ATP2B1	0.445148295524361	1.9575635922615	7.69948452301935	1.26391741294438e-13	1.16293836011216e-12	20.3168377222514
ALDH6A1	-1.26879558996332	3.72382923898217	-7.70760887928362	1.2954357004561e-13	1.19019204923616e-12	20.3039380694263
TUBD1	0.284006976153999	1.29583440952213	7.69578586595724	1.29582904089921e-13	1.19019204923616e-12	20.2924631923621
ERCC1	0.416397611055768	2.66298459037347	7.69085071082342	1.33965001824821e-13	1.22935374466099e-12	20.2599531673481
GSR	0.799254657683614	3.85938148618754	7.68787270580893	1.36679673262002e-13	1.25315838115241e-12	20.240343024529
RPL6	0.587788070603795	6.06815738918474	7.684431372327	1.39884350343836e-13	1.28140972784107e-12	20.2176886931931
GPATCH2	0.235215103869101	1.27583534464934	7.68327353902307	1.40979139066583e-13	1.29030070187107e-12	20.2100683114361
CTPS2	0.366675635249089	1.82651041132392	7.68313997746063	1.41105970678689e-13	1.29032466849491e-12	20.2091893175866
DNMT3L	-0.288993111058155	0.648617884117936	-7.68277926345797	1.41449071734418e-13	1.29232450059554e-12	20.2068154457826
FAM89B	0.43989391971385	2.88080814187249	7.68258194567208	1.41637103013006e-13	1.29290529534192e-12	20.2055169243934
PARD3	0.43339554612034	2.64555346383342	7.67878726819632	1.45301540548508e-13	1.32519087200869e-12	20.1805493549809
IK	0.357231536563626	3.9878055485841	7.67330723640522	1.50759115242771e-13	1.37375937644027e-12	20.1445085034956
KCTD5	0.432115858534107	2.40767542486944	7.66979065257487	1.54367302226568e-13	1.40540537732654e-12	20.1213905698451
TIPRL	0.393737259114513	3.43378705934754	7.669365752091	1.5480899896618e-13	1.40819254050847e-12	20.1185978033314
PJA1	0.442840407731012	2.09712580724237	7.66605474098898	1.58293875523611e-13	1.4386323525278e-12	20.0968391720052
ASNS	0.674972618666027	1.48125229716481	7.664362623739	1.60104615303277e-13	1.45381708371542e-12	20.0857218818073
RANBP1	0.496049388117592	3.03626315875896	7.66349110555402	1.61045186587542e-13	1.46108069718025e-12	20.0799966585556
ZNF26	0.183495620749174	1.07065480835622	7.66202614732057	1.62638515522645e-13	1.47424860318433e-12	20.0703740384758
IFI30	0.163342565757538	1.77081459676216	7.66181181014814	1.62872934907046e-13	1.47508635380505e-12	20.0689662701927
OTUD3	0.22065858460507	0.817905667806585	7.66145605173536	1.63262761908398e-13	1.47732889434185e-12	20.0666297089302
TMEM115	0.407379356140623	4.01934145018955	7.66114267971536	1.63606905840538e-13	1.4784039774219e-12	20.0645715993513
COL9A2	0.573648391800747	0.790353391917188	7.66108874533002	1.63666208513206e-13	1.4784039774219e-12	20.0642173847327
TARBP2	0.380420875204293	2.34951834124262	7.65761344215205	1.67532461576784e-13	1.51182002733261e-12	20.0413970990844
HIBCH	-0.388828177019537	2.57863885840689	-7.65750317955187	1.67656591402307e-13	1.51182002733261e-12	20.0406731916081
LUC7L	0.343083709423865	1.88701228760803	7.65721928109083	1.67976612174647e-13	1.51339206181287e-12	20.0388093466483
OPA3	0.31192394535616	1.69853888659855	7.65269973916143	1.73153113605308e-13	1.55867811449908e-12	20.0091444676567
PTGES2	0.548742495440421	3.51246240137279	7.64783057093595	1.78906221740877e-13	1.60907171553613e-12	19.9771989367993
CDKN2C	0.692623686689361	2.2070842409597	7.647145926875	1.79730130935181e-13	1.61508356414763e-12	19.9727083197538
MNT	0.206593737246452	1.58651863356944	7.64673050693086	1.80231875837356e-13	1.61819250319659e-12	19.9699837000173
RAB6B	0.319669460945098	0.784689069549479	7.64515231695059	1.82150643287352e-13	1.63400767052592e-12	19.9596337837607
FABP4	-1.31694912601442	1.52430758065412	-7.64498635834866	1.82353583320776e-13	1.6343565419306e-12	19.9585455017643
SERPINH1	0.866345163138919	3.56432667924181	7.64486330926493	1.8250419605694e-13	1.6343565419306e-12	19.9577386121686
LPA	-0.789564075956102	1.46116443492853	-7.64444223005254	1.83020528307744e-13	1.63756868911356e-12	19.9549774727329
ZNF646	0.251088931056564	1.31959970881201	7.64350270550818	1.84177784395571e-13	1.64650501230739e-12	19.9488171328831
POLG2	0.305177825400969	1.59201881614801	7.64328954635467	1.84441345376565e-13	1.64744341854837e-12	19.9474195524609
ZNF124	0.263039261181873	0.862571179923054	7.64299849587438	1.848018161133e-13	1.64924507369842e-12	19.9455113222604
PCCB	-0.527452692966321	3.42689595282794	-7.64113370759078	1.87127933124348e-13	1.66857078909504e-12	19.9332863578977
HSPA4	0.463729706590617	4.07876122429258	7.63875337418451	1.9013913815759e-13	1.69396686722216e-12	19.917684782555
BRCA2	0.174841464109076	0.48605231674271	7.63812786341068	1.90938329644878e-13	1.69962927879262e-12	19.913585540714
SYMPK	0.422199839184271	2.81048989371407	7.63747325270389	1.91778249378245e-13	1.70564422477843e-12	19.9092958549831
SAR1B	-0.52651487535134	3.32082087086082	-7.63650552735126	1.93026601612433e-13	1.71527830414881e-12	19.9029548066989
NPLOC4	0.42616194263017	3.39165177718394	7.63581756255075	1.93918937880031e-13	1.72173498008356e-12	19.8984472516877
RPL18	0.763388614783254	6.11064917603692	7.63538989521132	1.94475700652878e-13	1.72520373901118e-12	19.8956453176598
DRG1	0.419976772056591	4.04132962726677	7.63364051731307	1.96769608095413e-13	1.74406372772624e-12	19.8841851605504
TAX1BP3	0.802925960082123	2.67047332255812	7.62952966687801	2.02265617959549e-13	1.79124913841755e-12	19.857262514783
DEAF1	0.408565492828162	2.1505995452734	7.6276700991936	2.04801248071801e-13	1.81215959537467e-12	19.8450873505014
SAP30	0.477615903683183	1.84881885023779	7.62676617364909	2.06045103100864e-13	1.82161406894619e-12	19.8391698481862
PLEKHO1	0.577019731552998	1.85218986789524	7.62457428384201	2.09092299166906e-13	1.84698197597433e-12	19.8248228663754
STK4	0.361312514849658	1.55234131682508	7.61860943580474	2.17611602409257e-13	1.91998404132955e-12	19.7857951963907
TPM4	0.970434074960145	3.30441696033908	7.61853068474755	2.17726338148461e-13	1.91998404132955e-12	19.7852800808716
UBL4A	0.537294369885973	3.65633979012902	7.618132335432	2.18307624971196e-13	1.92196910052338e-12	19.7826745126721
LRRC59	0.52049907864168	4.31638233466535	7.61812285321875	2.18321480421409e-13	1.92196910052338e-12	19.7826124915458
LYPD1	0.92053787276737	1.00335492748254	7.61357779423818	2.25063575235148e-13	1.97964472442228e-12	19.752890686548
RPLP2	0.815897772183673	7.19843166572217	7.61257177790951	2.26583422489709e-13	1.99100104031819e-12	19.7463137184928
SEC61A1	0.519205977637866	5.68802851616742	7.61246984039233	2.2673798909284e-13	1.99100104031819e-12	19.7456473233833
LYRM2	0.273884219005739	1.8337236661141	7.61069570201525	2.29444809141909e-13	2.01306813966736e-12	19.7340503044297
CSNK1G1	0.246687086928178	0.930070963480546	7.60855467448047	2.32753862182794e-13	2.04037731675516e-12	19.720057654121
MYLIP	0.51153562587949	1.46720272904951	7.60491612343507	2.38485701028874e-13	2.08886126668461e-12	19.6962845252643
TBL1XR1	0.401634858388304	2.59320530825418	7.59817156576241	2.49481037318078e-13	2.18332688766655e-12	19.6522396048632
AUP1	0.41880555151164	5.27950197958528	7.59703413139116	2.51383981968955e-13	2.19812862347938e-12	19.6448144595871
CEP164	0.248816474771361	1.06905926934116	7.59575364371247	2.53543389600706e-13	2.21514611536765e-12	19.6364564330105
ABI2	0.250119963087748	0.954492225010421	7.59195643219454	2.6005512736491e-13	2.27012828829133e-12	19.6116772186327
RIC8A	0.364322504185228	3.22683234091154	7.59147623788887	2.6089025922444e-13	2.27550630799621e-12	19.6085442881922
RPLP0	0.774116845033883	7.28717231594809	7.58838709097304	2.6632635605227e-13	2.32097163311324e-12	19.5883932229388
CASP6	0.410531258605929	2.57166954301969	7.58825128428783	2.66567886914838e-13	2.32112926175301e-12	19.5875074682859
ERBB3	0.65428064322923	4.03128924521086	7.58960330973233	2.69765052003942e-13	2.34503712152046e-12	19.5790003660242
PSMA4	0.323673365425492	3.60216375061908	7.58657302251824	2.69570548094667e-13	2.34503712152046e-12	19.5765625075292
SACS	0.274700463959897	0.733646530963731	7.58622292857868	2.70201110610779e-13	2.34686382694379e-12	19.5742795552012
RTN3	0.4353905272816	4.1008562733724	7.58563872376346	2.71256576258058e-13	2.35406291910502e-12	19.5704701434752
CDYL	0.32394989565855	1.683381421817	7.58505423158321	2.7231662985284e-13	2.36128977538506e-12	19.5666590716612
C17orf80	0.355766209957438	1.74689187791681	7.58238189371412	2.77215539933453e-13	2.40176399401894e-12	19.5492373165174
TRIP4	0.287755291796503	2.43554739041445	7.58191075280316	2.78088199092107e-13	2.407316843474e-12	19.5461662741204
ZNF8	0.17555881559171	0.678746372236404	7.5805352059717	2.80651552818014e-13	2.42748403886222e-12	19.5372008289563
ZNF273	0.158212545447938	0.44130242755879	7.57111072812227	2.98851949048387e-13	2.58275711041152e-12	19.4758064875598
CENPQ	0.497347477657001	1.45179863775321	7.57094172900551	2.99188718845657e-13	2.58351821393906e-12	19.4747060762424
NOL11	0.347123409356842	2.93248652614587	7.56823075858703	3.04642386951582e-13	2.62842617579155e-12	19.4570564637775
ABCF2	0.438372958121088	2.69037512193313	7.56394342115031	3.1346798142982e-13	2.70232812538836e-12	19.4291534152416
SALL2	0.400408837605413	1.22738970274807	7.56177389468006	3.18029602429639e-13	2.73937936155812e-12	19.4150379964384
PFN1	0.592478663585237	7.0226513109067	7.56106090336564	3.19542972830544e-13	2.74952401542338e-12	19.4103997621929
CEP170	0.24716983852596	1.4395623257371	7.56096986582362	3.19736716464328e-13	2.74952401542338e-12	19.4098075571275
ENAH	0.545363921693431	2.42856459752247	7.56048214360929	3.2077664798544e-13	2.7561851276036e-12	19.4066349813419
ATF4	0.627618777793917	5.93816042656578	7.55779390720385	3.2656869982427e-13	2.80363277171447e-12	19.3891509985738
GM2A	0.532166425524853	3.47079747625261	7.5550520624796	3.32582474625775e-13	2.85285991297027e-12	19.3713230274522
MAGOH	0.420224162166154	3.66205471089926	7.55493034172775	3.32851965202153e-13	2.85285991297027e-12	19.3705316865212
SDC3	0.676346283409718	2.40623155380801	7.55348814333792	3.36061438763243e-13	2.8779935909914e-12	19.3611562564724
PLP2	1.46372117987419	3.63274670307937	7.56297627897212	3.47438429816178e-13	2.97297397770219e-12	19.3484867567141
F11	-0.953474138953582	3.27470333510643	-7.55432250405193	3.52139858843368e-13	3.00824741255338e-12	19.3235139378506
GINS3	0.269091778260022	0.846786393026473	7.5471545762699	3.50521250865784e-13	2.99688457118829e-12	19.3199985337689
FMNL2	0.652609714602889	1.18207131196245	7.54531242138137	3.54840952878849e-13	3.02883140386646e-12	19.3080323036874
MAML1	0.262611902552959	1.82825295655324	7.54169617978123	3.63473962369889e-13	3.09997333423514e-12	19.2845482058603
DCTN1	0.390013180566374	2.73141538653464	7.54142755939009	3.64123437349428e-13	3.10296494436904e-12	19.2828040965382
LRRC41	0.390067931345898	2.45766062650932	7.54070315431195	3.65880625669261e-13	3.1153835569281e-12	19.2781008762778
TTC13	0.370318303135307	2.18863668053939	7.53993578222042	3.67751159080976e-13	3.12874614294281e-12	19.2731190516
FTSJ3	0.395713237482212	3.10527728602035	7.53896095187107	3.70140991859032e-13	3.14650132850379e-12	19.2667909300596
PIM2	0.605381850046025	2.19308135536141	7.53702592921908	3.7493022743016e-13	3.18460768809853e-12	19.2542314817627
PDCD11	0.376066400267254	2.34635694346117	7.5341206489876	3.82235833465478e-13	3.24400803761388e-12	19.2353789104538
RPS19	0.88989184971005	6.54332295732938	7.53382444625473	3.82988501638497e-13	3.24774249389445e-12	19.2334571282474
USP36	0.359420177217858	2.06320700238717	7.53350585551223	3.83799690235882e-13	3.25196670650109e-12	19.2313901528758
BCORL1	0.35645004819637	1.51172588917416	7.53250791939413	3.86351592344303e-13	3.27092122353107e-12	19.2249160865873
CAP1	0.479834434840074	4.78988947787505	7.53129097641255	3.8948618289719e-13	3.29477399669056e-12	19.2170220717587
AP3M2	0.298092450722024	1.28762367638576	7.52978313331214	3.93404871736946e-13	3.32513000789387e-12	19.2072423521742
ZNF529	0.291797155072244	0.865560296884334	7.52966449009701	3.93714854612e-13	3.32513000789387e-12	19.2064729049259
NSF	0.318980333249642	2.653416792465	7.52729005487073	3.99969500560296e-13	3.37520972528055e-12	19.1910756367885
BBOX1	-1.28788733767217	1.16756696706013	-7.52604481635957	4.03288716913364e-13	3.40045713579223e-12	19.1830021804423
ATXN2	0.205793460931376	1.8455531304278	7.52490036317749	4.06363229230236e-13	3.42360196694541e-12	19.1755830237993
INTS7	0.402692035388899	2.34452771124384	7.52468227858437	4.06951717757997e-13	3.42578155921399e-12	19.1741693385548
IQCE	0.35405553218286	1.19935405318337	7.52263957587905	4.12504785457974e-13	3.46971636545542e-12	19.1609294247817
ITPKA	0.837320326093824	1.678075309333	7.52229062730531	4.13460841391623e-13	3.47494435305516e-12	19.1586679544305
UNG	0.498615631834861	3.49688081221888	7.52143505591479	4.15814206835241e-13	3.49189812498341e-12	19.1531234814116
WDR70	0.211884807765093	1.99362141558637	7.51859109137772	4.23732229175754e-13	3.5555172832615e-12	19.1346966777551
SMNDC1	0.249229655876122	2.1378731504768	7.51682921770745	4.2871192794708e-13	3.59439831114953e-12	19.1232835885258
SLC29A3	0.386759201499272	2.12478665432301	7.51327669197457	4.38928767241203e-13	3.67709035008195e-12	19.1002769457252
GTF2IRD1	0.348536698279307	1.73104544859349	7.51306263356838	4.39551996038135e-13	3.67934418601462e-12	19.0988909286371
ALAS1	-1.33590087963457	5.22070034636545	-7.51465316107416	4.41570873088117e-13	3.69326749568386e-12	19.0972252508116
RNF7	0.365202925686679	3.47349929873658	7.51155937595059	4.43953358966732e-13	3.71020715442189e-12	19.0891582283248
ZDHHC13	0.316689969923731	0.86907411240227	7.51043874976002	4.47262662838052e-13	3.73485895623929e-12	19.0819037674998
MPHOSPH6	0.318241679135051	2.2342947947042	7.50778474462161	4.55197477845216e-13	3.79806538141053e-12	19.0647260219222
ANXA5	0.998463796834304	4.9803694674651	7.5144156817254	4.65911527106588e-13	3.88122609750059e-12	19.0560116636629
PSMD13	0.41530157960652	3.95971682357024	7.50535805328504	4.6257405210442e-13	3.85651625462336e-12	19.0490234329489
RPS16	0.735979459531998	7.03839938464314	7.50399072326236	4.66782194332453e-13	3.88536332910699e-12	19.0401773782209
ZDHHC18	0.390189682521303	2.34273862437856	7.50220631000006	4.72330775255362e-13	3.92588064489194e-12	19.0286347460419
PHB	0.461735768551208	4.35790666816003	7.50218234387911	4.72405737977949e-13	3.92588064489194e-12	19.0284797328031
PSENEN	0.558851650695552	3.74972647015221	7.5012753696049	4.75251265568793e-13	3.94637102056644e-12	19.0226136761129
ADPGK	0.325390129801319	2.33699913176262	7.49856481175274	4.83856421187177e-13	4.01461701540926e-12	19.005085643323
SLC6A13	-0.560744863307309	1.13260820286722	-7.49580168695413	4.92786536914648e-13	4.0854481607896e-12	18.9872224643773
BRPF1	0.29078983399849	1.63119645750666	7.49260506238756	5.03320526777787e-13	4.16681599010433e-12	18.9665628014712
TCIRG1	0.713610646938644	3.71818273519779	7.4925801892713	5.03403356524926e-13	4.16681599010433e-12	18.9664020728177
RPL7A	0.721888746424427	7.43064763527865	7.49237945498678	5.04072312014297e-13	4.16706115763353e-12	18.9651049536899
POP1	0.235845286224087	1.14067200749266	7.49233059892858	5.04235259447954e-13	4.16706115763353e-12	18.964789255984
CSAD	-0.591242738506745	2.51020215059651	-7.49202829441329	5.05244677568995e-13	4.17208403067307e-12	18.9628358605537
CKAP5	0.449146891103513	2.72846033128486	7.49007402688142	5.11818360267703e-13	4.22300963181962e-12	18.9502094021338
HMGN1	0.528241877610238	3.518217617901	7.48536078004444	5.28021468747969e-13	4.35324366456659e-12	18.9197672163284
PSMB5	0.388453950133649	5.3043505711837	7.48514540220857	5.28773850172372e-13	4.35598949689976e-12	18.9183764578574
TJAP1	0.345783255508005	2.16756947903309	7.48338828015781	5.34951632107596e-13	4.40338950422639e-12	18.9070312980889
ALDH3B1	0.529084035520881	1.46408841191255	7.48137314865147	5.42124158290794e-13	4.45889608576783e-12	18.8940226639114
ZNF500	0.193927317896834	1.24094260001423	7.48048781350522	5.45305257227025e-13	4.48126718095121e-12	18.8883082171921
NUP133	0.343918766385828	2.55135798666843	7.48037640185508	5.45706871765815e-13	4.48126718095121e-12	18.8875891394628
BBC3	0.428776902471016	1.88608498180309	7.47891858356488	5.5098893261545e-13	4.52106874566295e-12	18.8781807526457
DDX56	0.379032097642524	3.66736690957023	7.47873047057259	5.5167417640869e-13	4.52311866182594e-12	18.8769668175724
GCNT3	0.591608910245991	0.909264642242988	7.47713016303562	5.57537729814259e-13	4.56758827863606e-12	18.8666405834165
ZNF222	0.250990460220189	1.09025794206801	7.47435047082081	5.67868943778894e-13	4.64855995900327e-12	18.8487080451418
GORASP2	0.38540885069731	3.64424498262686	7.47308795538355	5.72623403733992e-13	4.68378891180213e-12	18.8405648383962
COPE	0.542470972842153	4.94231923717244	7.47256097424538	5.74619530088028e-13	4.69641831514904e-12	18.8371661165654
PPRC1	0.388334621544532	2.20930755254966	7.46555853976724	6.01803894545906e-13	4.91473180545823e-12	18.7920212137054
CIAPIN1	0.403776724972551	2.9093755386959	7.46521623118078	6.03164795813718e-13	4.92197635421281e-12	18.7898151379564
RPA1	0.427728875915029	2.83601378742762	7.46348576799074	6.10091087772654e-13	4.97458886953087e-12	18.7786639625396
SRF	0.450746986035315	2.76998799568826	7.4593725215044	6.26870829570032e-13	5.1073993549596e-12	18.7521656669118
MDK	1.844703082835	4.90740211461825	7.50422772038423	6.95096927456457e-13	5.64555659297708e-12	18.732179007782
INPP4A	0.238003180953345	0.876303215893691	7.45384295368139	6.50147075320167e-13	5.29289013983221e-12	18.7165601060197
TUBGCP2	0.336748750245593	2.63146163651341	7.45017358322586	6.66061053806249e-13	5.41820064756407e-12	18.6929433114763
ODF2	0.399522942423589	1.8151952078585	7.44735095364333	6.78563432686211e-13	5.5155844591114e-12	18.6747821360483
KIF5B	0.513252920071583	3.29527822065951	7.44216576602792	7.0213599769453e-13	5.69827245628967e-12	18.6414331572122
SPAG5	0.602090080435286	2.33218510685101	7.43902597809446	7.16800308823635e-13	5.8127413021545e-12	18.6212476615596
GAN	0.114689980038406	0.381799411327686	7.43817678044498	7.20818059133014e-13	5.84076286916829e-12	18.6157893028113
ERAL1	0.397827371972151	3.99243548739657	7.43773218365812	7.22930392888123e-13	5.85331326681358e-12	18.612931766404
DEGS1	0.588303798398284	3.56561770983357	7.43464894411336	7.3774803886702e-13	5.96863444528864e-12	18.5931184677661
ZNF787	0.500284347440366	3.30305701928153	7.43422596280633	7.39804041064136e-13	5.98061041134182e-12	18.5904008072885
TRPM2	0.293531505899882	0.882075667412935	7.4329404389751	7.46087361843513e-13	6.02671501930825e-12	18.5821419995263
SF3B5	0.641568107873991	5.94426874421226	7.43236717968893	7.48906239092472e-13	6.04478477986993e-12	18.5784594526707
NDST2	0.097041924593655	0.870143854838618	7.43069926915293	7.57167658072261e-13	6.10672176401759e-12	18.5677461927091
MORC2	0.349640967880893	2.56005264518957	7.4298453819175	7.61431788743781e-13	6.13634865901505e-12	18.5622622228231
ACAA2	-1.05948913193596	4.5942511563408	-7.43018451779406	7.74631469242377e-13	6.23788504068978e-12	18.5491135714495
FANCA	0.256728834927828	0.961176768080122	7.42377633513439	7.92428794702102e-13	6.3762589615534e-12	18.5232980257005
SERTAD3	0.459911686064904	2.52725117505417	7.42359172141621	7.93390923589531e-13	6.37905953115174e-12	18.5221131459615
RPS11	0.703561698236935	8.31137254950435	7.42217519452276	8.008116701897e-13	6.43374449337247e-12	18.5130223782366
GMPPA	0.385021398635489	3.1606944780074	7.42195443756291	8.0197429178822e-13	6.43810582928595e-12	18.511605753604
CNP	0.38989271676943	3.32032652294794	7.4193750913291	8.15682357405359e-13	6.54309523453812e-12	18.4950560755325
CES2	-1.25776238942509	5.70716381267483	-7.45113381404556	8.67590026734935e-13	6.93804865105659e-12	18.4798076738254
RERE	0.499697394182675	1.97351871978757	7.41332869086646	8.48727845068332e-13	6.80292041247673e-12	18.4562776299554
RNF8	0.289394077743203	1.59734206141524	7.4107179376301	8.63401023071828e-13	6.91519647468786e-12	18.4395408443602
SUPT4H1	0.401485450805652	4.32664105878978	7.41024762229055	8.66070775145454e-13	6.93123514037826e-12	18.4365262513915
PCBP2	0.405708658040951	4.40646391775864	7.40904610267123	8.72928213535794e-13	6.97536790939218e-12	18.4288254804113
FNTB	0.23680280544113	1.34225056793439	7.40601169369109	8.90485608426606e-13	7.11019561901275e-12	18.4093814759176
SSR3	0.434702599799546	4.49877247315206	7.40418852402207	9.01201524799824e-13	7.19023152044590e-12	18.3977017290969
ACTG1	0.717018438999353	8.06529593074485	7.39869282215499	9.34277973713745e-13	7.44841104446537e-12	18.3625075528165
ZNF211	0.290201238144328	1.32993592156146	7.39452855513463	9.60135001880373e-13	7.648682821728e-12	18.3358526833421
SF1	0.343101919311565	3.99217263525987	7.39371621748531	9.6526059744619e-13	7.68079119607993e-12	18.3306543217923
BFSP1	0.200616859969687	0.590121217500469	7.39359231456806	9.66044752181374e-13	7.68079119607993e-12	18.3298614716845
DVL3	0.492544694860953	3.03451703991895	7.39353878538154	9.66383720954608e-13	7.68079119607993e-12	18.3295189434738
PTOV1	0.446800436133609	3.87667854825636	7.39248337953235	9.730909698482e-13	7.72818730488005e-12	18.3227658758091
TELO2	0.395384013308547	2.63372445111333	7.3902483709039	9.87446546054258e-13	7.83620681467657e-12	18.3084674150208
CASP4	0.495663389711577	2.14344699226045	7.38991597358072	9.89599301242073e-13	7.84729583305546e-12	18.3063411774816
GOLPH3L	0.446764222595265	2.79096393452165	7.38792645790665	1.00258131643122e-12	7.94417598404842e-12	18.2936163726454
YY1AP1	0.389798636139723	3.01468897646472	7.37843605054067	1.06685452114026e-12	8.44701582744285e-12	18.2329512969538
RAD51C	0.260719865155829	1.56558374618837	7.37409104637804	1.09761955267348e-12	8.68398470157814e-12	18.2051962119867
TGFBRAP1	0.319380755699853	1.46048176535963	7.37330564147953	1.10327319533798e-12	8.72054516368587e-12	18.2001804832382
ZNF473	0.228841104952062	1.07149847328205	7.37321609444457	1.10391960822554e-12	8.72054516368587e-12	18.199608645845
WASF1	0.485507800022051	1.817129026689	7.37023859095404	1.12562709484599e-12	8.88305328676062e-12	18.1805975712091
PRPF40A	0.323890423580065	2.64285829374583	7.3701605734138	1.12620149967883e-12	8.88305328676062e-12	18.1800995132082
PSMB4	0.525141557975558	6.42050993132686	7.36661085163204	1.15264411083763e-12	9.08472460044107e-12	18.1574424960203
LCAT	-1.45081296251652	2.94817685886831	-7.40746597173818	1.23294985948529e-12	9.68093963744004e-12	18.1496566359512
RHBDF2	0.503427760183688	1.85329076410402	7.36294776567854	1.18057244568356e-12	9.29779117950024e-12	18.1340703885622
PFKP	0.835942788438601	1.58250256454999	7.3617652613847	1.18972972396581e-12	9.36281240345213e-12	18.126527329434
ARHGAP17	0.251991360124756	2.1111312797272	7.36014345466772	1.20240284682287e-12	9.45538287115518e-12	18.1161834721673
BBS7	0.261726142571246	0.733561088981485	7.35810501987074	1.21852036117143e-12	9.57487860200361e-12	18.1031847658887
ANXA2	0.930453875489142	4.3935458083041	7.35351671045824	1.25558207897543e-12	9.85119836585861e-12	18.0739357763534
NRBP1	0.458097649980114	3.6848046266971	7.35013176701891	1.28363341934698e-12	1.00636860076803e-11	18.0523665371338
ATP1A1	0.937234626694921	5.09316268865127	7.35015274090412	1.28942016166929e-12	1.0101430346471e-11	18.0487719420501
TAF9	0.486661528255422	3.54727538339152	7.3473709981417	1.30696854900528e-12	1.02311901183623e-11	18.0347800680199
RAB11FIP5	0.466621498033966	1.7884717840838	7.34543676263441	1.32356595211634e-12	1.03533155953197e-11	18.0224616508415
FANCL	0.332277793535369	2.22460274004984	7.34393280212579	1.3366145641969e-12	1.04475185047987e-11	18.0128851578969
WAC	0.360030431806205	2.70053966070917	7.33938618144447	1.37683733812994e-12	1.07538242620254e-11	17.9839433370187
SRPK1	0.428585303218248	2.50436206607828	7.33863484671404	1.38359803792517e-12	1.07985097054595e-11	17.9791619474306
MAP2K2	0.501684072088889	3.92627673173078	7.33748200774463	1.39403521094422e-12	1.0871800128595e-11	17.9718261481617
RPL19	0.594848024209247	7.74438922775083	7.33690436122153	1.39929403585061e-12	1.09046259898096e-11	17.9681507627225
VBP1	0.425417318811455	3.49968033921985	7.33658126299356	1.40224400108991e-12	1.09194233008411e-11	17.966095082833
USP22	0.605819420002525	3.29805125247469	7.33521871014959	1.41475198106647e-12	1.10085719695269e-11	17.9574267180936
VAT1	0.801248320437147	4.56578656363085	7.33144433343247	1.44997682392548e-12	1.1274220993217e-11	17.9334209283941
B4GALT5	0.589720832975197	2.93249463926974	7.32847634394839	1.47828150329555e-12	1.1485705502045e-11	17.9145503760758
NUP214	0.271427809720288	2.14778411205139	7.32813801314475	1.48154240347989e-12	1.15024383313521e-11	17.9123996211088
MPP6	0.3824921589451	1.51852199084742	7.32609527823474	1.50138177166237e-12	1.16477623928519e-11	17.8994156088625
CENPT	0.316048739528844	1.94567520366313	7.32519741012704	1.51018458894266e-12	1.17073115745794e-11	17.8937094401161
EIF5B	0.381383285767161	3.14937309994803	7.3242215888122	1.51980932822108e-12	1.17731389273383e-11	17.8875084500024
UAP1L1	0.635978135984356	1.0281083218141	7.32368275608343	1.52514982161639e-12	1.18057051765656e-11	17.8840846271024
FOXJ3	0.340969873977782	1.95369128584727	7.3223837995745	1.53810018746029e-12	1.18970846964538e-11	17.8758316358231
PMS1	0.19192439858618	1.7598650405659	7.32111105941689	1.55089422509057e-12	1.19871199480959e-11	17.8677462682786
LSM14A	0.423537003966748	3.65892537107475	7.32064948803772	1.55555996027177e-12	1.20059544971601e-11	17.8648142909555
USP14	0.365918027222304	3.07468322970627	7.3206413304334	1.55564254458775e-12	1.20059544971601e-11	17.8647624737484
DTNB	0.22917716726328	1.07693059812367	7.31963150408959	1.56589904974603e-12	1.20761390710927e-11	17.8583483758421
E2F8	0.36778478748546	0.977025992644489	7.31811803600463	1.58139574099257e-12	1.21866016004679e-11	17.8487365380612
CAMSAP1	0.287174481521068	1.42892165023513	7.31754590454371	1.58729316877815e-12	1.2222981050606e-11	17.8451033914242
TRIM25	0.463775504982159	2.21993334835312	7.31723785469615	1.59047745783254e-12	1.22384295051588e-11	17.8431473022492
ADRA1B	-0.605424030528771	1.01509042654473	-7.31615110814318	1.60176141495636e-12	1.23161344030841e-11	17.8362470478276
SLC26A6	0.510282879022258	1.86221209236575	7.31050164032543	1.66170389816069e-12	1.27675888269921e-11	17.8003882719422
DNAJC9	0.357752126151919	1.87496272114796	7.30963927319404	1.67104617991561e-12	1.28298800568835e-11	17.7949163981318
KCNMB3	0.174389688755738	0.663664298179335	7.30736420769877	1.69594164373045e-12	1.30114045753855e-11	17.7804830083384
GNB1	0.469029606006377	4.41280464451405	7.3056078749195	1.71541029500401e-12	1.31510569332116e-11	17.7693428341221
ZNF468	0.494620442929217	1.27123695130025	7.30511990010069	1.72085837942304e-12	1.31830950187659e-11	17.7662480320542
CUL4B	0.413595946770521	2.70495883889685	7.3033036744214	1.74128614050871e-12	1.33297571316172e-11	17.7547306379127
CLK2	0.450253895762849	2.95542822982439	7.30268583283971	1.74828953110024e-12	1.33735137327462e-11	17.7508131504809
SLC7A7	0.464666490530648	1.5287113280316	7.30101666236408	1.7673490227673e-12	1.35093610364288e-11	17.7402308405275
ATG9A	0.344897535329642	3.09964629556435	7.30085535163996	1.76920176462081e-12	1.35135793609419e-11	17.7392082484094
LGALS9	0.696461390502857	2.06931003748641	7.2994462722148	1.78546736529945e-12	1.36250818050036e-11	17.7302764307267
CYP39A1	-1.07944565376126	1.297954446234	-7.29936388570224	1.78642293207691e-12	1.36250818050036e-11	17.7297542420902
STX16	0.395608009089659	2.8289033258935	7.29681489257504	1.81623781209193e-12	1.38423172355179e-11	17.7136001860183
CHKA	0.643082419248775	3.00281555760674	7.28905362495103	1.91006991213531e-12	1.45467787736522e-11	17.6644396415045
ZNF143	0.274567660746929	1.63599409379658	7.28772865544191	1.92655880986822e-12	1.46616065325356e-11	17.6560510702723
KLC2	0.417749471789663	1.61211865724958	7.28695039070405	1.93630938432611e-12	1.472502334142e-11	17.6511242956346
HAO1	-1.22010726429105	5.62045481907395	-7.31444706786518	2.0386804613157e-12	1.54695490373612e-11	17.6418545171598
EP400	0.248356909246011	1.48025423420409	7.2853610433709	1.95637291764067e-12	1.48667168020858e-11	17.6410642141255
SUPT6H	0.322500730224434	3.05049535063497	7.28466274100203	1.96525272790247e-12	1.49232787554465e-11	17.6366446921046
GLYAT	-1.67727188962905	3.63146176318883	-7.37438937682797	2.28232325313112e-12	1.71430035817253e-11	17.6110722637544
CPN2	-0.992660919145576	5.29801885529909	-7.29717022152198	2.0969170564155e-12	1.5853547585185e-11	17.5994986090723
FKBP9	0.470598815272762	2.8868241820869	7.27767939806805	2.05626722338691e-12	1.55916086982067e-11	17.5924648507628
ATXN2L	0.588851248994186	2.95549599371495	7.27683744815668	2.06751703960183e-12	1.56654755706665e-11	17.5871404258294
KNG1	-1.23649175650464	8.26600800917716	-7.29967900864806	2.15414711323315e-12	1.62389551612961e-11	17.5811948055824
TTC26	0.208832090824103	0.676203111207991	7.27505241851335	2.09156879341989e-12	1.58361637216077e-11	17.575853560971
ABL2	0.301513661793651	1.17407980822605	7.27469922227434	2.09636036368651e-12	1.5853547585185e-11	17.5736205220834
ZNF672	0.389632286821709	3.15204623533097	7.27400186487676	2.10585269693798e-12	1.59095256842121e-11	17.5692118053142
NBEAL2	0.420570737835309	1.3761617283082	7.27307934690207	2.11847494763179e-12	1.59932541831388e-11	17.5633801010391
ALAD	-0.872053434256971	4.29102369111327	-7.2741094171125	2.13290730622897e-12	1.60905164103896e-11	17.5591725902859
OSBPL3	0.334102904602647	1.22570993747503	7.27018172706848	2.15860783621226e-12	1.62607818727868e-11	17.5450663701776
AKR1D1	-1.76162434234115	3.09853602246625	-7.33157937473281	2.39024052537323e-12	1.78519711840162e-11	17.5326037701846
TIAL1	0.284772236160646	2.58623946536421	7.26582569101748	2.22035299242101e-12	1.67137875980214e-11	17.5175453234397
TM9SF4	0.394320589828775	3.55098121545191	7.26329295211543	2.25704983997182e-12	1.6973225164363e-11	17.5015493749855
UPP1	0.492720618400881	1.79025235930574	7.26322202992888	2.25808598162781e-12	1.6973225164363e-11	17.5011015137322
MSH6	0.353963646492378	2.140978239323	7.26108092381873	2.28958807809989e-12	1.71851451989174e-11	17.4875823413989
PTPN6	0.389031013680654	2.60908237011447	7.25884589246888	2.32293376891411e-12	1.74228418711045e-11	17.4734732954442
MED12	0.410126532877113	1.99562784000693	7.25634997945309	2.36073712185402e-12	1.76936054991483e-11	17.4577212266096
HDGF	0.489705271974492	5.99130018792682	7.25619656165217	2.36308046574294e-12	1.76983993353552e-11	17.4567531168537
ELF4	0.483854800081815	1.14827419680587	7.25580961882307	2.36900091133808e-12	1.77299578292363e-11	17.4543114660867
ECHDC2	-0.582806255592964	3.41480991301428	-7.25461492984272	2.38737265520062e-12	1.78519711840162e-11	17.4467734652497
RPL38	0.749619024845351	5.61846671583023	7.25441347912323	2.39048432652085e-12	1.78519711840162e-11	17.4455024847842
INPP5F	0.250247546427466	1.1528588697056	7.25419420469775	2.39387584797984e-12	1.78519711840162e-11	17.4441190821119
NXPH4	0.919033939146226	0.871340298847166	7.25419287651712	2.39389640540378e-12	1.78519711840162e-11	17.4441107027137
BSG	0.707460939995567	6.01774057041234	7.25301236717763	2.41223710448778e-12	1.79758386236865e-11	17.4366634063444
MRPL48	0.270789970036252	2.35520919824405	7.25286793626071	2.41449049915174e-12	1.79797328352604e-11	17.4357523196757
IGF2BP3	0.412271604730284	0.994277744127717	7.25207418936656	2.4269114960276e-12	1.80592812469447e-11	17.4307455162688
INCENP	0.460818696490017	1.33880410112964	7.25165724605955	2.4334612439223e-12	1.80950575532318e-11	17.4281156820399
ZNF202	0.238999941780176	1.15536836311063	7.24683379097312	2.51050986374628e-12	1.86546326642321e-11	17.397700381307
ATP6V1E1	0.395576789328068	4.27026066411696	7.24445614973043	2.54936864669525e-12	1.89298366703862e-11	17.3827132451902
DYNC2LI1	0.265584839790492	1.57975523743025	7.24258327807384	2.58039423691045e-12	1.91465252378755e-11	17.3709104485155
HAT1	0.283776362878279	2.24493459815348	7.24233656051361	2.58450892254303e-12	1.91633680852084e-11	17.3693558101812
LRCH3	0.207069138247813	1.64790162390193	7.2417315563137	2.59462637801161e-12	1.92246639192472e-11	17.3655436725632
RRM1	0.520514437648436	2.95710230260756	7.2405854329515	2.61389997740635e-12	1.93536656915874e-11	17.3583225916807
SFI1	0.354357499706815	1.11195981019614	7.24037415946197	2.61746818102357e-12	1.93662816698524e-11	17.3569915693148
ARHGEF1	0.414420911047388	2.6013275353101	7.23845210742999	2.65015084686814e-12	1.95941402115774e-11	17.3448839837113
MAP3K1	0.443637329589743	1.36149930665597	7.23559842153792	2.69941754840446e-12	1.99442030532187e-11	17.3269121986162
CIB2	0.50507597786913	0.997315428380867	7.23466867060035	2.71566292178504e-12	2.00499690344726e-11	17.3210580117162
RNF25	0.328475574239199	2.69249011629919	7.23431081914662	2.72194121990069e-12	2.00820492843242e-11	17.3188049464231
TRAPPC3	0.321930181462893	3.26703485872276	7.23263523660138	2.75152899742737e-12	2.02859355750714e-11	17.3082564377383
SUPV3L1	0.276678589695642	2.68611272589832	7.23167787757877	2.7685761603526e-12	2.03971412437892e-11	17.3022302755854
GGA2	0.43829132536965	2.52268165453439	7.22770962514026	2.8403524024126e-12	2.09111132220142e-11	17.277258215995
GPATCH1	0.248904495101573	1.68570487424369	7.22569722804539	2.87744890776066e-12	2.11692204347151e-11	17.264598206995
ERGIC2	0.300070638229006	2.48382439540897	7.22453345824871	2.89911910239566e-12	2.13135521837835e-11	17.2572781270878
MRPS7	0.393243436142846	3.78991403974176	7.22350544030346	2.91839511361276e-12	2.14400908346601e-11	17.2508126583371
GTF3C4	0.30752438843951	1.33538324632201	7.22177252732905	2.95117440372771e-12	2.16655828310413e-11	17.2399154863476
RPS4X	0.714089268837676	7.11218286863909	7.21786659795622	3.02639301486537e-12	2.21959626289217e-11	17.2153608107252
RNF41	0.284308519713358	1.89816276793795	7.21779991574634	3.02769340057586e-12	2.21959626289217e-11	17.2149416987039
ESPL1	0.359805865354712	1.41771982175032	7.21473083792388	3.08814328864729e-12	2.26231540779041e-11	17.1956550303423
CDO1	-0.985106191048632	5.44219832682217	-7.23968487812449	3.22836444634148e-12	2.35672873285982e-11	17.1905306469613
PPP3CB	0.30041736953462	2.36571167850936	7.21386547689862	3.10540152231593e-12	2.27335525114995e-11	17.1902180501251
RPS12	0.871198270969819	8.51685875152988	7.21174241826351	3.16180399926249e-12	2.31301548903794e-11	17.1734633641139
TEAD4	0.574087821700704	1.42238346335945	7.20996832721419	3.18430802437099e-12	2.32783896954017e-11	17.1657387017585
ZNF267	0.237303454626354	1.06974132957185	7.20813304685832	3.22214784948211e-12	2.35384471592266e-11	17.1542141104393
CDC27	0.36360767687726	2.38137689246787	7.20369880012488	3.31540972443514e-12	2.41857276807811e-11	17.1263784790663
EMILIN2	0.409937223132444	0.915299548427778	7.20259635907531	3.33900591010128e-12	2.43407672941278e-11	17.1194599907167
NOLC1	0.475496563066499	3.43029748284548	7.20076939658495	3.37847397797976e-12	2.4611211559084e-11	17.1079964415935
NSFL1C	0.349565579931511	3.29998904959103	7.20051075140156	3.38409850346689e-12	2.46219048846289e-11	17.1063737103638
TKT	1.06145923919353	3.9617025687327	7.20048392766357	3.38468234263093e-12	2.46219048846289e-11	17.1062054216362
ITIH1	-0.962790764989847	7.51947736116234	-7.22086159409978	3.58013831521154e-12	2.59347816028016e-11	17.0872289537856
ANP32E	0.516234425916419	3.35692963666998	7.19725423732262	3.45570862412729e-12	2.51209945328442e-11	17.0859461987171
NCAPD3	0.275347561041358	1.46159595789069	7.19580453331839	3.48806524506658e-12	2.53384767592669e-11	17.0768547078472
CCT8	0.460346131630929	4.46947780001692	7.19494706873173	3.50734358070669e-12	2.54607163636486e-11	17.0714779607016
MDC1	0.416182679176903	2.0737928864688	7.19475518938887	3.5116719364113e-12	2.54743352482127e-11	17.0702748437947
SLC25A15	-1.07644717043	3.0992006463066	-7.19470740245601	3.52786147410792e-12	2.55739183482436e-11	17.0665946379441
PTBP2	0.228483142376552	1.14229967625574	7.19132208699218	3.59000952967684e-12	2.59881665465387e-11	17.0487527719437
GRSF1	0.339749288499151	2.62804816148	7.19020877251791	3.61578097729656e-12	2.61562417777062e-11	17.0417750777747
ABCB6	0.382155540755425	1.5586432187892	7.19010194896164	3.61826332639236e-12	2.61562417777062e-11	17.0411056042763
ZNF562	0.1892531108716	1.38610343879041	7.18813102160776	3.66436562071051e-12	2.64710918414052e-11	17.0287549556689
LRRC8B	0.347986346448186	1.17918958262186	7.18494962047605	3.74000519091447e-12	2.69987310098815e-11	17.0088243513731
ACY1	-0.348394746582509	2.57855753337595	-7.18381433113724	3.7673677265241e-12	2.71773721827308e-11	17.001713682942
MAPK13	0.763562169825254	1.35246017038353	7.18230744238821	3.80399106025264e-12	2.74225254225568e-11	16.992276878658
GPD1	-1.64834585971327	2.78496582368049	-7.21276080064508	4.02518736506782e-12	2.88967839311158e-11	16.9856971023344
PROZ	-1.30679142821911	2.44570803157686	-7.1862420164196	3.90995183151379e-12	2.81278252255992e-11	16.9754807341238
ABCC6	-0.729025486966879	3.43857293474134	-7.18109172843086	3.88339073269736e-12	2.797549440448e-11	16.9745632123404
DHTKD1	-0.879520513696833	3.91842069929354	-7.18008202899057	3.90861408502574e-12	2.81278252255992e-11	16.9682482653517
TMEM132A	0.687419369067663	1.10683621789068	7.1764822532381	3.94889137598431e-12	2.83882931582872e-11	16.9558109830997
OTC	-1.36349080156343	4.97580767797483	-7.21899511815408	4.23013783221947e-12	3.02219200832846e-11	16.9534955232736
PTPN1	0.442650319951303	2.77550961970241	7.17545533793278	3.97499306708903e-12	2.85561742606645e-11	16.9493847660394
TRPC1	0.256074951565184	0.615094300112365	7.17128011721991	4.08287726790748e-12	2.92906968639661e-11	16.923264258419
CCHCR1	0.515383781929824	2.38638139367983	7.16878591139988	4.14869524040372e-12	2.97423368925562e-11	16.9076657765714
VRK1	0.337177221026622	1.80882002590828	7.16805039673716	4.16830288069754e-12	2.98622967756455e-11	16.9030667314756
MAPK7	0.289646126444958	1.30736299291001	7.16784837986447	4.17370427497504e-12	2.98803859465477e-11	16.9018036173998
EXOSC10	0.341240037317712	2.59664079546676	7.16761380906598	4.179984719416e-12	2.99047391634252e-11	16.9003369929862
DDR1	0.822412148147676	1.77314558548201	7.16703143191443	4.19561764482762e-12	2.99959229831172e-11	16.8966959094779
BICD2	0.309491818080827	1.77186618066076	7.16429870398949	4.26974506362837e-12	3.04839255814237e-11	16.8796135837422
DNAJC8	0.400800841485064	3.91080941361654	7.16276010653393	4.31204640956365e-12	3.07647926528483e-11	16.8699979473632
ZNF629	0.329153760917119	1.84173088994965	7.16086555377918	4.36470122187556e-12	3.11190914844498e-11	16.8581598677289
EAF2	0.258337545118113	1.06193531178523	7.15923220496447	4.41060409246463e-12	3.14247978823886e-11	16.8479558117574
GFOD2	-0.294618159822629	1.80895904016993	-7.15857852705789	4.42910759331177e-12	3.15350032072123e-11	16.8438725672271
SMTN	0.419868406216603	1.65605894301242	7.15735823584355	4.46385475878801e-12	3.17606323522533e-11	16.83625068567
ENSA	0.469292466706532	4.37191189907493	7.15721856879749	4.46784877782484e-12	3.17672916523234e-11	16.835378394368
DDX49	0.460188073105797	3.64306126568589	7.15615966774261	4.49824451398232e-12	3.19615348914147e-11	16.8287654396912
HAAO	-1.07380628952974	4.43685529354916	-7.16237948826364	4.70143533211563e-12	3.33596381352576e-11	16.8018821231269
RPP21	0.358131650189854	2.31934204927464	7.14929901381054	4.70016997824407e-12	3.33596381352576e-11	16.7859377799905
DUSP11	0.248330033986764	2.08765038324267	7.14790179763151	4.74237374754684e-12	3.36271525525710e-11	16.7772194519351
CBX5	0.451014185440651	1.86908397226437	7.14428759374731	4.85328091152275e-12	3.43900969364927e-11	16.7546735652405
RAD9A	0.335739896497508	1.94036971720644	7.14412817084683	4.85823138195927e-12	3.44017093359188e-11	16.7536792621284
CYB561	0.826155037097501	2.17835603478088	7.14073155372218	4.96489347980057e-12	3.51330473216405e-11	16.7324989155594
PALMD	-0.507416217815556	2.26790144369021	-7.13997751125833	4.98888306270357e-12	3.52787728082809e-11	16.727797951164
MYB	0.138985315847952	0.301666992677418	7.13958867206816	5.00129838341346e-12	3.53425085761217e-11	16.7253739382093
CBR4	-0.423267658835916	2.40125011090001	-7.13665629990066	5.09591111528152e-12	3.59866245177053e-11	16.707096821393
RPS27	0.768795247135894	8.14385479128578	7.13343274760749	5.20195193851564e-12	3.671051408784e-11	16.6870113601073
UNC45A	0.380743444713631	2.67601753456799	7.13308671854368	5.21346304676183e-12	3.67667713033007e-11	16.6848557134671
TAP1	0.791036963099529	3.25733235856246	7.13225712941641	5.24116260455451e-12	3.69370401194792e-11	16.6796879693725
SF3B2	0.324185108090168	3.67714056569901	7.13201667574501	5.24921826906898e-12	3.69687317824329e-11	16.6781902007071
ZNF226	0.236405329774419	1.34928631427755	7.13150560025382	5.2663807848875e-12	3.7064473979276e-11	16.6750068749046
CAND1	0.314693720665032	2.35338350430005	7.13035461569998	5.30523468412514e-12	3.72906157979059e-11	16.6678383915743
PDE4A	0.436606387997772	0.97133260990621	7.13029927722591	5.30710984138344e-12	3.72906157979059e-11	16.6674937583069
CD2AP	0.417081973477893	2.73233881791156	7.13023519973118	5.30928193734143e-12	3.72906157979059e-11	16.6670947032738
ALDH18A1	0.581033707591118	3.42472478870934	7.12737899548171	5.40699518924777e-12	3.79512608283147e-11	16.6493098906101
IVNS1ABP	0.520608607631149	2.88077063752209	7.12334613301635	5.54798301723623e-12	3.89145493470965e-11	16.6242075191855
ZMYM3	0.350990702808692	2.34951169792572	7.12316922555134	5.55424979655759e-12	3.89322178722269e-11	16.6231066125989
ARNT2	0.437501998968221	0.765578137676323	7.12173666796826	5.60525405654459e-12	3.92632361020804e-11	16.6141924759149
DOK1	0.360157848344701	1.13752722400136	7.12123769842397	5.62312719263754e-12	3.93618903484628e-11	16.6110879399433
SMC2	0.382117365162236	1.53718165645105	7.11970500982448	5.67837969922758e-12	3.97218911216001e-11	16.6015527418123
N4BP3	0.181516839004906	0.556129197727487	7.1100930535016	6.03726991367069e-12	4.22040106751084e-11	16.5417900279224
THOC1	0.247289528165286	1.63955857476975	7.10916312761733	6.07315326519413e-12	4.24263053926271e-11	16.5360114197258
STX3	0.558380661124166	1.827183905175	7.10540874843229	6.22017104800497e-12	4.34241511066369e-11	16.5126873304293
OGFRL1	0.329732670712462	1.04521239135663	7.10194729922314	6.35881778725652e-12	4.4362255993298e-11	16.4911913373041
B4GALT2	0.483897078658817	3.03659430469708	7.09662464582604	6.57796814853759e-12	4.58603578033614e-11	16.4581525387872
GNAI3	0.20558568019393	1.8681218404523	7.0927399838994	6.74258665124115e-12	4.69765192039524e-11	16.434051498588
GRWD1	0.303799931763255	2.53328743782994	7.09218990969342	6.76622215200553e-12	4.71095949832664e-11	16.4306395621686
DHX8	0.291749608534422	2.03038622881015	7.09164216859179	6.78983840353734e-12	4.72423585639289e-11	16.4272422966089
TBL2	0.340678988908088	2.63211807799839	7.09002292954919	6.86012835425166e-12	4.76994734564701e-11	16.4172004213857
PPP2CA	0.305049651340097	3.7225457121952	7.08945585285722	6.88491361074596e-12	4.7839787684568e-11	16.4136840488504
MAOB	-0.694855557941009	5.46849950362776	-7.09283831491077	6.93649433448592e-12	4.81659780391977e-11	16.4126554577447
ALG3	0.417206173872068	4.02321508351692	7.08668970244486	7.00708269416606e-12	4.86236306125565e-11	16.3965345496649
RBBP4	0.431600736482431	2.88585415472501	7.08447108655886	7.10660878564384e-12	4.92813431677358e-11	16.3827833077908
LRPPRC	0.376661932813126	3.41453665833413	7.08418169982862	7.1196926554361e-12	4.93391376281989e-11	16.3809898956504
TFR2	-0.877609029308144	6.18420343140154	-7.09766919908544	7.35300620291487e-12	5.08880935615454e-11	16.3732877850896
FRAT2	0.51426485409783	2.67839260476495	7.08240419159497	7.20057953489627e-12	4.9866413472335e-11	16.3699753890997
PPP4R1	0.300837192529258	2.4722466109154	7.07843102462863	7.38466499394815e-12	5.10731690793165e-11	16.345362848646
NUDT3	0.203809999212023	1.69841029813474	7.07374201285192	7.60788030786737e-12	5.25819432056728e-11	16.3163293578632
RPL23AP7	0.22295794913677	1.00180811189223	7.07359827018482	7.61482686168443e-12	5.25949610632832e-11	16.3154395606849
RPL28	0.745245595545627	5.54202047098537	7.07098276215855	7.74232006464971e-12	5.34400138415821e-11	16.2992514166919
PNO1	0.31792386271598	2.56193174729708	7.07035888894573	7.77303968863925e-12	5.36164251564306e-11	16.2953907545028
SLC37A1	0.380023045006296	1.24369751204619	7.06815253349344	7.88264603573372e-12	5.43363815654956e-11	16.2817394258604
ACTR1A	0.359387099230878	3.73721621266311	7.06762601963624	7.90902585660422e-12	5.44820693623373e-11	16.2784822179607
DAD1	0.417580025467938	6.53175465291202	7.06642644646303	7.96945262783792e-12	5.48547529592482e-11	16.2710619065548
GPR19	0.168526150002677	0.455668832652011	7.0663426916236	7.97368857994463e-12	5.48547529592482e-11	16.2705438521869
RPS6	0.70828587989782	7.61611593533203	7.06218856517304	8.18658881563577e-12	5.62821208582557e-11	16.2448549124613
NOSIP	0.447371756753121	3.07242058160662	7.06073529999085	8.26238165269598e-12	5.67656220953742e-11	16.235870693432
DDX46	0.258779373311171	2.40082745924455	7.06028055136976	8.28623986927809e-12	5.68919099550964e-11	16.2330596842942
VIPR1	-0.241928386026101	0.699455586347077	-7.06002186811198	8.29984181891417e-12	5.69476597192076e-11	16.2314607062123
RPS15A	0.533758248223696	4.85848964786907	7.05960943867632	8.32157341187178e-12	5.70590789455604e-11	16.2289114813037
AKR1C3	0.92919528558284	5.44750332601087	7.06305702967708	8.41228167727552e-12	5.76246342836586e-11	16.2259175683141
USP3	0.258470868389954	1.92840327770815	7.05784554591863	8.41514923068061e-12	5.76246342836586e-11	16.2180101437124
IL2RG	0.932813780639617	2.08566203777335	7.05741407873628	8.43819600525241e-12	5.7741599503611e-11	16.2153438742606
ARPC1A	0.457691334511853	4.77552140615433	7.05731780176391	8.44334709722614e-12	5.7741599503611e-11	16.2147489436045
RHOA	0.393938707623422	6.20305352192666	7.05619975012478	8.5033930640646e-12	5.8113978387831e-11	16.2078405451426
YTHDF2	0.296505827861254	3.31402229547934	7.05509758508506	8.5629969472879e-12	5.84828483158624e-11	16.2010311239331
RBM39	0.358480793489383	3.53177622104166	7.05480765572257	8.57874416844279e-12	5.85519017225911e-11	16.1992400100911
SSBP1	0.30916173058309	3.29196860651994	7.05455642307656	8.5924126527317e-12	5.86066859071418e-11	16.1976880005167
ZNF248	0.184908597290449	1.25526883471613	7.05391856141615	8.62721227637503e-12	5.88054338103569e-11	16.1937477483931
SPAG8	0.110764583964084	0.472481552828234	7.05260585447061	8.69926608314214e-12	5.92576892273315e-11	16.1856396383983
SBNO1	0.296044316132298	1.48893181006545	7.05046316831433	8.81815080644876e-12	6.00281458567429e-11	16.172407516442
RCL1	-0.579064524303413	2.49527014583863	-7.05007735156813	8.8397266057055e-12	6.01356122986697e-11	16.1700252366018
GTF2F1	0.377904503641295	3.67458051746801	7.04920440471516	8.88873575280994e-12	6.04294417540508e-11	16.1646354693406
ARID3A	0.70955188199969	1.3078801441384	7.0487013434205	8.9171000150068e-12	6.05826258704321e-11	16.1615296880605
ZNF587	0.237731163334103	1.49640753931963	7.04822067041157	8.94428512623788e-12	6.07276038505615e-11	16.1585622842883
MGAT4A	0.39050103978642	1.58976787588149	7.04621181009739	9.05878402062027e-12	6.14648258694993e-11	16.1461623812423
PTP4A3	1.03968637793471	2.29573453981275	7.04558751479398	9.09465972518851e-12	6.16679668572182e-11	16.1423094001539
COASY	0.419298059197006	4.00088287489076	7.0414155908364	9.33801683946288e-12	6.32767899075932e-11	16.1165680878665
SAFB	0.316117577032992	2.97225414387067	7.04104879256964	9.35971679532146e-12	6.33824889633633e-11	16.1143054499681
RNF113A	0.395752573474616	3.10736665169507	7.03819212879159	9.5304244734851e-12	6.44964491404321e-11	16.0966868569565
ZNF74	0.263813324968911	1.06351525118822	7.03590899518045	9.66905810067442e-12	6.53920413735715e-11	16.0826094492603
METTL8	0.190196327319003	1.09731774127381	7.03523855042723	9.71014347469691e-12	6.56271765876067e-11	16.0784762632861
SLC38A6	0.298843319595711	1.47540027770378	7.03480293752765	9.73693015626774e-12	6.576542942998e-11	16.0757909393478
MAGED1	0.858912439267841	4.05932261017474	7.035532942223	9.80850459485046e-12	6.61628219034459e-11	16.071606731204
ADRM1	0.410099136362779	5.18216699414847	7.03399523243199	9.78678998106457e-12	6.60592425752429e-11	16.070812198226
LEPROTL1	0.382239720615437	2.47251518684417	7.03041320809153	1.00109527046596e-11	6.74846052537339e-11	16.0487376399651
OSBPL2	0.210909246906034	1.95345670312641	7.02948274942055	1.00700022553369e-11	6.78386403556681e-11	16.0430050033985
POLR3D	0.334138506417433	1.12413307203423	7.02882950625636	1.01116634849986e-11	6.80751524835812e-11	16.0389806610183
PRAF2	0.488365331666554	2.48029036784987	7.02828400132732	1.01465834654729e-11	6.82660032638166e-11	16.0356202646269
CALM2	0.42726357312244	4.84387542372206	7.0255932739197	1.03205708863354e-11	6.93916442506484e-11	16.0190478674309
TM2D1	0.264487936885948	1.76134810980204	7.0224999615938	1.05242181320119e-11	7.07151215752518e-11	16.0000018951323
LRRC3	-0.805665214055274	1.61377744849583	-7.02227145117866	1.05394178530779e-11	7.07349340311471e-11	15.9985951769976
NOC4L	0.395317179070958	3.00251044595532	7.02225090880821	1.0540785317695e-11	7.07349340311471e-11	15.9984687191537
CAPG	1.32174168394743	2.40481125979533	7.02174693686224	1.06580916469378e-11	7.14759561190383e-11	15.9903362723858
PML	0.372481256685857	1.62243974604477	7.01973098334065	1.07098622173171e-11	7.17768056216065e-11	15.9829583186053
HEATR1	0.337289214105366	2.05912525697132	7.01484090940805	1.10456123789509e-11	7.39792529932575e-11	15.9528715229208
TRIM32	0.317245180337996	1.56668908229388	7.01355807544114	1.11353918252935e-11	7.45325066244516e-11	15.9449813733014
MADD	0.300765851826957	2.10050966792465	7.01028276712618	1.13678834656506e-11	7.60141293739933e-11	15.9248413808908
EPB41L2	0.43497330123265	1.8417027953035	7.01023393030422	1.13713859306109e-11	7.60141293739933e-11	15.9245411357722
ECM2	-0.611342018308421	2.14776889237643	-7.00960216831928	1.14167902353814e-11	7.62685639647213e-11	15.9206572543431
PUS7	0.326503330240403	1.90755933418011	7.0092578720104	1.1441609593591e-11	7.63852445104262e-11	15.9185407373158
ZNF516	0.291589838779177	1.55318828414721	7.00785023052666	1.15436357067632e-11	7.70168835721622e-11	15.9098882686401
GADD45A	-0.84936254558301	4.00879260888727	-7.00737557972313	1.16692119373137e-11	7.78012624842e-11	15.9009856380185
SLC7A11	0.457803950726311	0.704068314827251	7.0060396832161	1.16761809985433e-11	7.78012624842e-11	15.8987611748829
TMEM11	0.337937628613012	2.29851556273796	7.00490754670557	1.17598210707696e-11	7.83083469763808e-11	15.8918045105296
ATP6V0B	0.525075980000466	4.6036755463414	7.00417391646821	1.18143346100952e-11	7.86209531900502e-11	15.8872970147826
PPCDC	0.325317553277597	1.57868830632602	6.99983300094177	1.21420162052411e-11	8.07498491293500e-11	15.8606333829417
TREM2	0.84715951243477	1.75969808390854	6.99798893276582	1.2283909031516e-11	8.1641232897881e-11	15.8493102022279
LIMS1	0.36727663533442	2.29628789103145	6.99620954413002	1.24223705192993e-11	8.25086860322767e-11	15.8383863353112
SLC35C2	0.329823297070386	2.66126933016178	6.99570868714111	1.24616202968866e-11	8.2716493063296e-11	15.8353119006592
CCDC134	0.312984105809513	1.29827598735917	6.99239143279194	1.27246741304077e-11	8.44086301830620e-11	15.8149536832975
ZNF783	0.233242709530295	1.0266657190699	6.99185482783117	1.27677362398512e-11	8.46402323290201e-11	15.8116611951298
BPHL	-0.523217988214876	2.90353663367537	-6.98949015412098	1.2959212929841e-11	8.58547856601965e-11	15.7971543859194
FGFR3	1.03969019215256	2.9870581574394	6.99020929901173	1.31034248158533e-11	8.67548610497668e-11	15.7901642733761
SMAD2	0.17688085662869	1.50920962295281	6.98658388361108	1.31984163017345e-11	8.73281200907121e-11	15.7793301243012
CTNND2	0.713710399755526	0.850492770488973	6.98360717519394	1.34479175260485e-11	8.89223216171814e-11	15.7610797394922
MRPL33	0.431755959525864	3.69547822901474	6.9808953946513	1.36792470071138e-11	9.03944134286883e-11	15.7444588208565
AAMP	0.382370029877069	4.40676014175717	6.97869317155182	1.38699839805831e-11	9.15965629944672e-11	15.7309646906851
SAP130	0.33114729271862	2.28003265073698	6.97835647107927	1.38993755522366e-11	9.16759672626486e-11	15.7289018443225
PTRH2	0.323632444759237	2.56990819653881	6.97835323759542	1.38996581092291e-11	9.16759672626486e-11	15.7288820342638
MAP3K7	0.318873027564104	1.97564006826698	6.97369953393865	1.43122301439114e-11	9.43372123952736e-11	15.7003782248712
CA5A	-0.462643665077566	1.41606319862822	-6.9709971560684	1.45573103171275e-11	9.58917815943691e-11	15.6838329115182
ANKRD49	0.211026389879759	1.91437915978568	6.97024432719285	1.4626316627451e-11	9.62852833497853e-11	15.6792245894955
YOD1	0.349890536795997	1.15807692810806	6.96949763428552	1.46950782039558e-11	9.66766766198179e-11	15.6746542041484
PFKFB4	0.324857710848363	0.780334470693503	6.96923833433017	1.47190309398588e-11	9.67729705083878e-11	15.673067159145
FBP1	-1.38173412271611	5.93601857129716	-7.00950516415293	1.59913481548477e-11	1.04476807945005e-10	15.6644621151705
MTCH1	0.464433977445806	4.91303769604658	6.96345605902257	1.52632519726582e-11	1.00286363252854e-10	15.6376884964714
AP2M1	0.429702467552952	4.91392663694024	6.96335725558645	1.52727210883726e-11	1.00286363252854e-10	15.6370841662773
TRIP12	0.299058941569756	2.87612665228852	6.9621203060677	1.53917577046728e-11	1.0100415605568e-10	15.6295189331234
VDAC1	0.486465583303957	5.56581877391596	6.96133590710241	1.5467715749225e-11	1.01438529799842e-10	15.6247220507828
ABCA8	-0.524421020232409	1.58507116572247	-6.96028865976161	1.55697017737099e-11	1.02042941340882e-10	15.6183184012518
FIP1L1	0.271844830953672	1.96818137377123	6.96013865747994	1.55843637546549e-11	1.02074634730993e-10	15.6174012361053
AGA	0.516180599895497	2.6376786549634	6.95963464245571	1.56337282446775e-11	1.02333439827164e-10	15.6143196271409
OSBPL7	0.274231193215943	0.667080556730984	6.95745594328449	1.58488901374749e-11	1.03676492914414e-10	15.601000763149
SMG7	0.396765752505162	2.88453919095702	6.95673292241358	1.59209349528843e-11	1.04082235551015e-10	15.5965814847176
PBLD	-0.969011941110762	3.22537897878704	-6.95431088382776	1.61646309917257e-11	1.05542543521085e-10	15.5817799633253
DDX50	0.346051632268636	2.82425121749983	6.95377970663843	1.6218564338602e-11	1.05828169817461e-10	15.5785343703674
USP24	0.30950777456295	2.07026109786725	6.95063715328496	1.65412838840565e-11	1.07866200243301e-10	15.5593366635185
CD58	0.44465840126007	2.02486596477848	6.94674164756843	1.69501012905306e-11	1.10462768008803e-10	15.5355484421455
AMPD3	0.248281306324903	0.84884397086102	6.9462040963051	1.70072894939634e-11	1.10765970697989e-10	15.5322666447088
ZDHHC3	0.254844833767825	2.33162417673002	6.94548325115603	1.70842755500456e-11	1.11197653141525e-10	15.5278661277794
HSD17B8	-0.860668775891226	4.14732861106396	-6.94655449636816	1.7164637723172e-11	1.11650755584415e-10	15.5257764485816
S100A11	1.58336735412989	5.08059407659871	6.96300343001155	1.85639438090281e-11	1.19926771323498e-10	15.5041516273592
NOL9	0.203176086153654	1.77588526121019	6.93911046634082	1.77799617453171e-11	1.15580877728632e-10	15.4889776610164
RPL13A	0.749530489225599	8.10770233519864	6.93868989569718	1.78268406856054e-11	1.15813146367773e-10	15.4864121879072
THOC7	0.382865137990483	3.85797728587976	6.93832898551281	1.78671664370056e-11	1.16002578092259e-10	15.4842107376184
UBE2Q1	0.427132524231967	4.10178511218494	6.93804112952462	1.78993938673024e-11	1.16139227666169e-10	15.4824549603029
HCCS	0.338588141549841	2.84674897782513	6.93792711405208	1.79121744678295e-11	1.16149605725226e-10	15.4817595384958
PEMT	-0.894820136280111	3.97206910205715	-6.93682237859025	1.80364756849331e-11	1.16882663390571e-10	15.4750218095555
ZNF574	0.235420657239973	1.87885849105738	6.93631180079348	1.80942103946924e-11	1.17183701733207e-10	15.4719080981235
SYNCRIP	0.356872014984879	3.16744974723138	6.93467662684668	1.82803367262898e-11	1.18315350724423e-10	15.4619373249373
AAK1	0.242488835037658	0.851732300419172	6.93449464162141	1.83011675311809e-11	1.18368742127961e-10	15.4608277482139
PDPR	0.333165829945079	1.15425315165727	6.93440553563734	1.83113754909158e-11	1.18368742127961e-10	15.4602844709103
SDF2	0.316418099461861	3.11962520253477	6.92806836915051	1.90518975303746e-11	1.23002555342158e-10	15.4216606458587
NDOR1	0.410576305433023	1.63475896490451	6.92642606590811	1.9248561703473e-11	1.24195067686756e-10	15.4116555441949
SERPINB6	0.474510194516438	3.43122541672969	6.92424382310939	1.95129737412959e-11	1.25822949239343e-10	15.3983638870414
SLC35A2	0.398548372745688	2.98651832328325	6.92325540186711	1.96339078897887e-11	1.26524215359259e-10	15.3923446457292
TSSC4	0.423793726359552	3.14710559491848	6.92235580348706	1.97446147796682e-11	1.27158746640541e-10	15.386866887552
MRPS34	0.552039773272924	5.17457925969117	6.92105686640069	1.99055488150886e-11	1.28115762757831e-10	15.3789584749354
ACOT9	0.307924503156393	2.14873806476391	6.91671155049192	2.04533480087639e-11	1.31559987068136e-10	15.3525108630511
CTLA4	0.320155975131283	0.642162143494534	6.91517596008668	2.06504569031421e-11	1.32745635092723e-10	15.3431675992298
RBX1	0.361374464669782	3.38131226987892	6.91492230265144	2.06831956648875e-11	1.32873863059277e-10	15.3416243799802
DDX42	0.295160900721354	3.06637796648723	6.91456658655787	2.07291927750684e-11	1.33087054726459e-10	15.3394603222677
NCOA6	0.267347425107854	2.2788670089259	6.91442452450407	2.07475906899373e-11	1.33111653665647e-10	15.3385960881721
POMT2	0.215166181998992	1.11538248682983	6.91433917120145	2.07586521889052e-11	1.33111653665647e-10	15.3380768481656
CDKAL1	0.340374725353892	1.58802011908099	6.91195723016799	2.10696928161804e-11	1.3502280627667e-10	15.3235884876342
APEX1	0.430318905222784	5.23698461661211	6.90873954301223	2.14971524882995e-11	1.3767720101631e-10	15.3040227249369
ATN1	0.601121163355065	3.10933043815013	6.90850970284139	2.15280101780819e-11	1.37789876605e-10	15.3026254058932
SERPINC1	-1.20294124295919	9.63671204756748	-6.94175087898767	2.29293546553109e-11	1.46398362728561e-10	15.3019862892563
BTG3	0.448783587683308	2.48687671113994	6.90768998368047	2.16384183179092e-11	1.3841126199904e-10	15.2976421939905
GTF2E2	0.418357745277017	2.61218576897706	6.90684164967683	2.17532666678874e-11	1.39060267166778e-10	15.2924855065173
PRKAG1	0.268380309258114	3.03174288648217	6.90054109805241	2.26251983610979e-11	1.44545240206079e-10	15.2542021892054
TNPO1	0.288638632785538	2.55201415357532	6.89444153173942	2.35020074104104e-11	1.49962440405002e-10	15.2171657138489
BTBD3	0.374657265377799	1.96430668088028	6.89204014408067	2.38562942830681e-11	1.52107401874145e-10	15.2025914420319
ECHS1	-0.778585833827551	7.29146025101526	-6.89245690846136	2.38820920732317e-11	1.52107401874145e-10	15.2023647182401
SETDB1	0.38711088754693	2.18368753737418	6.89187853511886	2.38803247694058e-11	1.52107401874145e-10	15.2016107608239
DPAGT1	0.328399463256241	2.86805457880789	6.89041025441823	2.40997440205734e-11	1.53399596130954e-10	15.19270169942
GEMIN8	0.33344889128292	1.86660994438419	6.89008309878791	2.41489033165032e-11	1.53618375781896e-10	15.1907168220282
XPO1	0.379625588809619	2.79818238664357	6.8890563303133	2.43038292981133e-11	1.54509289319951e-10	15.1844878132107
DHX9	0.534681163750528	3.54548560107208	6.88868021617764	2.43608241412758e-11	1.54776905920228e-10	15.1822062525701
SERPINA6	-1.02898226499384	6.91009191454737	-6.89962158640736	2.52085603754493e-11	1.59869673492166e-10	15.1734315345848
ABL1	0.446620115598797	2.5739408462312	6.8870934784717	2.46027217126081e-11	1.56218259871988e-10	15.1725819373713
ZNF394	0.235648353151285	2.18681651335073	6.88626961970111	2.47292482157895e-11	1.56925736387063e-10	15.1675855176383
STX1A	0.254917570515312	0.822153820443153	6.88288883498752	2.5255193034165e-11	1.60067690810803e-10	15.1470870453338
PIGT	0.478816092305775	5.17282846608998	6.8825971958901	2.53010747234334e-11	1.60260709894528e-10	15.1453191340953
GDI1	0.402194458705394	3.68900045351431	6.88201922300953	2.53922456452332e-11	1.60740187545815e-10	15.1418156429199
SNX27	0.410307961530041	2.48856488657687	6.88172077927117	2.54394492581069e-11	1.60940925026318e-10	15.1400066589162
TBC1D22A	0.357090312273899	2.51489762945268	6.87780631913036	2.60666253493038e-11	1.64808340918179e-10	15.1162851859249
SLC12A9	0.372369114990486	2.02400143618086	6.87764108955017	2.60934301029943e-11	1.64877464665392e-10	15.1152841300895
APOH	-0.890148933166333	10.6611332485466	-6.89532049298517	2.72721613414501e-11	1.71907288844043e-10	15.1083954882425
PIGG	0.231956750346546	1.96328716294405	6.87613913419295	2.63383339864795e-11	1.66323777174194e-10	15.1061852709422
GTDC1	0.143283416921206	0.993393772690537	6.87505544346608	2.65164386363076e-11	1.67346758538252e-10	15.0996212143213
NDUFA4L2	0.88962227296361	2.32061634303396	6.87365913987629	2.67476672303651e-11	1.68703562349139e-10	15.0911647968522
IGSF3	0.519551669574831	1.60159744757039	6.8652315251879	2.81859530776704e-11	1.77548090407292e-10	15.0401528630298
DHX30	0.290821513386797	2.91966784837843	6.86514431342805	2.82012272980392e-11	1.77548090407292e-10	15.0396252269955
PSPH	0.642313479819113	2.72811660375481	6.86369934694378	2.84554850608328e-11	1.79040326354895e-10	15.0308838516361
CD24	1.63359806540316	4.57185916756654	6.92119353524432	3.26766422480256e-11	2.03138814884794e-10	15.0293850346033
SUB1	0.416675109790003	3.6583744356037	6.86195554789367	2.87653268609527e-11	1.80880275684973e-10	15.0203365692769
GMCL1	0.402936018141289	2.1110219272309	6.86094981840615	2.89455319764677e-11	1.81903318918056e-10	15.0142544047644
ZNF668	0.170687156696819	0.77867495064722	6.85792052312092	2.94950464962433e-11	1.85244584645088e-10	14.9959388535232
SH2D2A	0.393533824728194	1.02508115723308	6.85645119659701	2.97652620148749e-11	1.86828726169499e-10	14.9870573450755
MAT1A	-1.00109981679989	6.70146025883014	-6.87326659206541	3.08206025399923e-11	1.93102785998456e-10	14.9855355135866
JRKL	0.307196328647981	1.51294916067614	6.85593054662735	2.98615943492761e-11	1.87320194505e-10	14.9839105707457
ZNHIT3	0.222672665005943	2.15711051818951	6.8516796975895	3.06596474980791e-11	1.92210270494898e-10	14.9582256221618
ASRGL1	0.423025754442742	1.47957895920196	6.85062045322739	3.0861749410947e-11	1.93218913070556e-10	14.9518272542874
NFKBIL1	0.510646507498531	3.37981653365878	6.85052022959756	3.0880939555238e-11	1.93218913070556e-10	14.9512218928084
SKIV2L	0.366609390929316	3.21328462787835	6.85039702796803	3.09045454390447e-11	1.93218913070556e-10	14.9504777511202
TRIM27	0.341749565689128	3.02888238490746	6.85035011876285	3.09135380750158e-11	1.93218913070556e-10	14.9501944207743
ATR	0.166658559644244	1.74846689359959	6.84885447829705	3.12016087294802e-11	1.94902171666771e-10	14.9411615781213
ABCF1	0.40542635797355	3.92007599634	6.84870835706023	3.12298937300074e-11	1.94961620232763e-10	14.9402791682397
CLDN14	-0.873327450698776	2.2331165228787	-6.84822193671563	3.13242328230281e-11	1.9543311145082e-10	14.9373418347418
SRP72	0.371816330578496	3.47559741943775	6.84709256652955	3.15443504536074e-11	1.96688302828376e-10	14.9305225589291
LRP10	0.539421961526729	3.51609242824697	6.84343864079986	3.2266976878097e-11	2.01073398806042e-10	14.9084656621424
IER3IP1	0.372585657432689	3.13159200151813	6.84328318443258	3.22980791368706e-11	2.01146550403964e-10	14.9075274526991
SDCCAG8	0.311652714231582	1.41886416033631	6.84230392638814	3.24946783061269e-11	2.02249681392478e-10	14.9016178184933
LSM7	0.519346541929353	3.68094522079283	6.8419651899717	3.25629575343346e-11	2.02553295129741e-10	14.8995737614672
FNBP1	0.342052796453252	2.42599163541766	6.83944509242017	3.30753796504994e-11	2.05494643426667e-10	14.8843690451772
DMPK	0.419018098442402	1.41344093515352	6.83795010985643	3.33830964990325e-11	2.07282490395666e-10	14.8753512879658
BTN2A1	0.384336619576563	2.08056216628855	6.83641796114527	3.37013819343629e-11	2.09133784667958e-10	14.8661109257648
SOCS5	0.287049922725013	1.81222361231325	6.83528215176788	3.39392553863039e-11	2.10484170121149e-10	14.8592619128053
HLF	-1.24031999131936	2.49919244847749	-6.83419227024927	3.41690608296977e-11	2.11782937887172e-10	14.8526906756901
PDE9A	0.577701680079145	1.24950432464878	6.83365842412731	3.42821813891794e-11	2.12357364502562e-10	14.849472245916
OLFML2B	0.581289231059002	1.51048261121035	6.83295967604646	3.44308004108566e-11	2.13150866905827e-10	14.8452599557946
RPS13	0.518408512384775	6.23326838467472	6.83207078189539	3.4620777413292e-11	2.1419930659278e-10	14.8399018823153
ACTR3	0.327542830470193	2.96800637291345	6.83030302952162	3.50016524548675e-11	2.16383202993452e-10	14.8292478326177
CDC42	0.415407711467057	4.5599522900881	6.83023949315623	3.50154181971498e-11	2.16383202993452e-10	14.8288649456235
UTP14A	0.339839939411237	2.07106243435325	6.83011784290027	3.50417896968404e-11	2.16417426498679e-10	14.8281318565964
C2orf49	0.231463743706913	1.57602891436614	6.82829505629503	3.54392805532321e-11	2.18742273551382e-10	14.8171485860106
SP1	0.407390726284594	2.46930276946158	6.82464758639551	3.62480239057738e-11	2.2360123060165e-10	14.7951774286101
B3GALNT1	0.323857903507463	0.685424007315473	6.82238182279079	3.67595074025333e-11	2.26621817743333e-10	14.7815337905877
ZBED5	0.238481769515761	1.70092251296153	6.82004740723105	3.72939046397531e-11	2.29780000829036e-10	14.7674804230606
RIF1	0.277605647651184	1.20627002598681	6.81894546547899	3.75488072523799e-11	2.31213402334157e-10	14.7608479398687
AARSD1	0.17630213461655	1.34008128101909	6.8169879231924	3.80058565851816e-11	2.33739946749372e-10	14.749067724818
AP2A2	0.271475946572975	2.77082318473093	6.81696811525804	3.80105091858568e-11	2.33739946749372e-10	14.7489485368333
DYM	0.3201829838686	1.90452868075563	6.8168995512446	3.80266182139428e-11	2.33739946749372e-10	14.7485359766234
RPAP1	0.284381782932497	2.06383169873392	6.81662227445143	3.80918324846877e-11	2.34002339355964e-10	14.7468675923097
MICALL1	0.348992383100361	1.86739984760959	6.81642110128311	3.81392162901903e-11	2.34154952022752e-10	14.7456571591123
ATP7A	0.206026393523724	0.858207622525633	6.81579423897286	3.82872374855229e-11	2.34924880684945e-10	14.7418855862924
SMARCA5	0.392330343898856	2.34129660780898	6.81471089699094	3.85443790654668e-11	2.36318312882287e-10	14.73536819635
LRRC42	0.510254864359581	3.1486040804332	6.81464601765308	3.85598325313319e-11	2.36318312882287e-10	14.7349779074492
RBM26	0.285153175106273	1.61216164008876	6.81394100354286	3.87281512410292e-11	2.37209926351304e-10	14.7307370019418
PPAT	0.278752556275661	1.49615584619733	6.81247247755544	3.90810758510617e-11	2.39230533848455e-10	14.7219043979422
CHD3	0.600257635515209	1.58419824823655	6.81180122975621	3.92434443795152e-11	2.40082980102711e-10	14.7178675986545
RPL4	0.599386247840782	6.60085758285577	6.81112017357848	3.94088627775028e-11	2.40953070354738e-10	14.7137721280176
CBL	0.289917297141623	0.791052790127262	6.80779375682601	4.02266949006906e-11	2.45695172025931e-10	14.6937735773512
TUSC2	0.374526722122248	3.12956080626394	6.8077733766392	4.02317566053244e-11	2.45695172025931e-10	14.6936510741882
TNFSF9	0.31738429695123	0.530699736549767	6.80749136530245	4.03018623364006e-11	2.45978699148372e-10	14.691955962834
MYEF2	0.248043459547749	0.366439712457834	6.80593495209631	4.06909384276633e-11	2.48207556304502e-10	14.682601666657
VEGFB	1.34346619665733	3.85826443672435	6.82663117710214	4.3641689634421e-11	2.6418990205266e-10	14.6766883826308
NME3	0.561336145967866	3.8231976163322	6.80239144317256	4.15905704377189e-11	2.53546270954826e-10	14.6613107876778
BNIP1	0.310642367102763	1.8482639009438	6.80212629207262	4.16586677982806e-11	2.53750077299048e-10	14.6597179950295
MTX2	0.36437524631842	3.43383763137589	6.80206543950904	4.16743116890107e-11	2.53750077299048e-10	14.6593524535892
PLEKHB1	0.617537981347882	0.776035995456278	6.80191982687449	4.17117690102415e-11	2.53750077299048e-10	14.6584777685693
MAP4	0.400749833133507	3.12355009870379	6.80188120036781	4.17217108227545e-11	2.53750077299048e-10	14.6582457442532
BRD8	0.329433392860652	2.18018473847377	6.80109833440195	4.19237097916733e-11	2.54829430846052e-10	14.653543392154
TEAD3	0.477031413627564	2.52703188827362	6.80031179616314	4.21276237759915e-11	2.55919155429825e-10	14.6488194049085
HUWE1	0.344493727144164	2.84282034755043	6.7974326102593	4.28824125937938e-11	2.60217002303737e-10	14.6315304876914
FCHO1	0.333689610446943	0.680238060132581	6.79742205175102	4.2885204846361e-11	2.60217002303737e-10	14.6314670964788
OSBP2	0.304581024615729	0.79502391965345	6.79716360092906	4.2953609236607e-11	2.60479914039622e-10	14.6299154322542
MUTYH	0.2642325551015	1.86103639598125	6.79699000984569	4.299961389238e-11	2.60606761443433e-10	14.628873267127
SFT2D2	0.37075799676761	2.27479105797183	6.79510843652951	4.35013797602422e-11	2.6349407169061e-10	14.6175784466447
SIN3B	0.299873356830718	1.73809097243456	6.79388355612171	4.38311093156755e-11	2.65182040519066e-10	14.6102269652323
RPS23	0.570670525166334	5.88764737967188	6.79146904684275	4.44882848943708e-11	2.69001340793204e-10	14.5957385863403
TSNAX	0.261603354377105	2.63822653949564	6.79085131567642	4.46579665595246e-11	2.69870248179373e-10	14.5920325028234
MAGED2	0.548264647477819	4.71149010846524	6.79088712743472	4.48039835987068e-11	2.7059522187405e-10	14.5896867432678
ZBED4	0.333230940979842	1.45127389483038	6.78636014921509	4.59108838446729e-11	2.77119268668485e-10	14.5650955770825
MLYCD	-0.262178978445401	1.33952387407474	-6.78593863066917	4.60302337732615e-11	2.77678320811057e-10	14.5625681213166
IER3	1.43291955965053	3.23078256142001	6.79129619828559	4.75525598213181e-11	2.86362893579045e-10	14.5546549458859
P2RY6	0.329205003907256	0.754820749781779	6.78272047553069	4.6951532334256e-11	2.8307168768906e-10	14.5432758475192
ITGA2	0.472938932961076	0.932201173198406	6.78206085113235	4.71425953837828e-11	2.84058747590914e-10	14.5393223928476
IPO4	0.204283250262654	1.42532826142238	6.77986321678573	4.77846770059497e-11	2.8759398883998e-10	14.5261530399308
IDH3B	0.388537924214199	4.28185744219778	6.77883856373938	4.80869781143513e-11	2.89245818559283e-10	14.5200139261157
RPL27A	0.670964463489787	5.45897878431275	6.77627774527938	4.88507289965057e-11	2.93669775935012e-10	14.5046741712888
RPL37	0.620944815510412	5.47642752001751	6.77593949541086	4.89524969718439e-11	2.94111358324762e-10	14.5026483314967
EFCAB2	0.260922972188112	1.0298464887193	6.77346935081255	4.97020198500823e-11	2.98441955030437e-10	14.4878565697028
DHX15	0.333540677747574	2.83455667181255	6.7726919233041	4.99402405725744e-11	2.99699144464415e-10	14.4832020321688
NDUFB3	0.375913371789158	4.53270712111211	6.77251408726286	4.99948908234045e-11	2.99853883298802e-10	14.4821373680577
PRPF38B	0.4020833245746	2.13896299575404	6.77108631508539	5.04357893766866e-11	3.02323704584547e-10	14.4735904067713
SART1	0.341762042551701	3.59788319436066	6.76938587107577	5.0965874212317e-11	3.05324971924769e-10	14.4634129987525
WDR12	0.2110137344322	2.07943827263442	6.7689491311313	5.11029014033038e-11	3.05969417739205e-10	14.4607993665129
CHST10	0.326685454202768	0.840712683599176	6.76624801871593	5.19584510565356e-11	3.10912666806043e-10	14.4446377066277
AZGP1	-1.17564571528172	6.94245229036427	-6.78780084170474	5.45047150473057e-11	3.25773866462262e-10	14.4425250798382
CTDP1	0.243180252100184	1.77151472132193	6.76271514806098	5.30987139323877e-11	3.17552930529444e-10	14.4235069288769
FAH	-0.595361106227813	3.9379352795613	-6.75669437698374	5.5287726644501e-11	3.30263889812005e-10	14.3850188127945
AKR1B1	0.792667904920839	2.2465710853118	6.75575152829406	5.54187109534191e-11	3.30856074358688e-10	14.3818813179663
SNN	0.448115452345686	2.23880312092333	6.75537906753546	5.55455660849628e-11	3.31422941120387e-10	14.3796558431033
RAMP3	-0.964784488352788	2.28452100771696	-6.75398985969057	5.60212321199295e-11	3.34069207383368e-10	14.3713560870078
NEDD8	0.322346337474136	3.65408033202871	6.75263782897779	5.64880092400397e-11	3.36659460691642e-10	14.363279719493
UBN1	0.291259691061164	2.28810783417978	6.74742505577314	5.83236972775413e-11	3.47400554655447e-10	14.3321529534442
FLAD1	0.419364828220761	3.33035962492617	6.74675662278032	5.85632847440757e-11	3.48627737490807e-10	14.3281629274368
MMP1	0.576524454954338	0.513546941616919	6.74643977811338	5.86771892783063e-11	3.49105751559591e-10	14.3262717182935
RPP38	0.243131968562118	2.46156412168199	6.74519670566405	5.91261744551948e-11	3.51575672719269e-10	14.3188526306689
PALB2	0.252318589377366	1.58721331568922	6.74357561166465	5.97167693156389e-11	3.54884324743053e-10	14.3091789788413
TUG1	0.403024407011423	3.29058558214809	6.74244605273029	6.01317096771367e-11	3.57145912021782e-10	14.3024395643322
CEP135	0.153284684614294	0.590151288321602	6.74175154320105	6.03882401415774e-11	3.58464593480403e-10	14.2982962705612
HSF2BP	0.138972171360006	0.549711092663776	6.74135981943984	6.05334045910817e-11	3.59121077608313e-10	14.2959594778891
LY96	1.28065477970397	2.25137123479215	6.74140949070737	6.0720713399487e-11	3.60026695658602e-10	14.2937876641438
CSPG5	0.219198103594916	0.529770898988796	6.74071617061554	6.07726715714242e-11	3.60129214080978e-10	14.2921200787119
CBX6	0.528526180448281	1.73368935079386	6.74049201860926	6.08562146289244e-11	3.60381250923444e-10	14.2907830672174
MTBP	0.147321074436048	0.634996976742151	6.74041596079351	6.08845875404933e-11	3.60381250923444e-10	14.2903294089543
LIF	0.610344794390549	1.00695742373383	6.74029464328324	6.09298711982346e-11	3.6044390774901e-10	14.2896058007002
DDX51	0.274690722534876	1.65436632533128	6.73868818843905	6.1532633491029e-11	3.63802502393175e-10	14.2800249255797
RBBP8	0.379249452787022	1.92199366536217	6.73719707318446	6.20973571067125e-11	3.66932506043532e-10	14.2711335265094
DEDD	0.356729675432999	3.29873829189303	6.73354495380648	6.35020959582652e-11	3.75019768513052e-10	14.2493627125137
SLC2A6	0.581937200996631	1.63621683734913	6.73309855886739	6.36759216752498e-11	3.75832655887781e-10	14.2467023184502
ZBTB32	0.12459248062642	0.361062642759578	6.73215554561583	6.40446676215984e-11	3.77650471323648e-10	14.2410826644613
RPS10	0.71325111027561	5.49331423295079	6.73212507781248	6.40566163334875e-11	3.77650471323648e-10	14.2409011093626
VPS11	0.313929764288904	2.45425610765321	6.73026995642873	6.47882880359764e-11	3.81747439658379e-10	14.2298478026117
MRPL42	0.18744745949774	1.88145588165881	6.72950470049394	6.50924952083413e-11	3.83322471782455e-10	14.225288896051
EXOSC7	0.273246256006529	2.31659852729704	6.72653804718877	6.62851247150954e-11	3.90124575377003e-10	14.2076192894212
CDK5R1	0.223374737912431	0.571612512909023	6.72631408352329	6.63760268632592e-11	3.90438373191131e-10	14.2062855918982
OGDHL	-1.25358245540589	2.86997793108232	-6.73654308785826	6.87519719084488e-11	4.03956721824076e-10	14.1982933835367
HPX	-1.25239566231395	8.08557736241752	-6.74957609552272	7.11800701672805e-11	4.16573841632513e-10	14.1918810658992
ABCG5	-0.74692034913376	3.04891289251447	-6.72296168454498	6.77514151483032e-11	3.98303169530602e-10	14.1863262865543
PAF1	0.360513942703448	4.11673103394185	6.7200917428798	6.89510701933685e-11	4.04897522424371e-10	14.1692455722656
NDRG2	-0.735423058145898	3.65159773041972	-6.71903520279445	6.98661198294498e-11	4.1003912586911e-10	14.1580937883643
SLC25A20	-0.584417103615674	4.24430550018599	-6.71781213239831	7.03901827912352e-11	4.12415051126725e-10	14.1508217009787
PACS2	0.252300124710953	1.82342157196098	6.71674873000373	7.03747872511535e-11	4.12415051126725e-10	14.1493565070881
ITGB4	0.751536882804983	1.14365701806872	6.71665852250775	7.04136019392239e-11	4.12415051126725e-10	14.1488199297222
CCNE1	0.689667642426453	1.16210887012751	6.71662099499454	7.04297555543713e-11	4.12415051126725e-10	14.148596708087
SUOX	-0.388987178032859	2.94307663997449	-6.71473409560357	7.12466744034593e-11	4.1672885906708e-10	14.1373742838133
DONSON	0.396954281833067	2.12467989859569	6.71167870561434	7.25892542269547e-11	4.24342809740915e-10	14.1192074253124
SUPT16H	0.360598019314222	2.93974992055734	6.71139488231846	7.27152237266498e-11	4.24737902607785e-10	14.117520185191
BET1L	0.349682554392241	3.42584393425734	6.71134223316959	7.27386146264199e-11	4.24737902607785e-10	14.1172072087044
XPO7	0.403316738748736	2.16353180647921	6.71003622897661	7.33212150528602e-11	4.27899315712984e-10	14.1094441904941
ZNF32	0.428549915496632	3.34152433616994	6.70900462397749	7.37846443939751e-11	4.3036209206323e-10	14.1033130621489
ARL8B	0.338574786396708	3.73031472805189	6.70887080359374	7.38449710527033e-11	4.30472255496904e-10	14.1025177826483
KMO	-0.616356318391649	1.70166381111269	-6.70827959200262	7.41120712533718e-11	4.31786986079656e-10	14.0990044268572
RPL39	0.61645374380437	4.84452913167817	6.707376481124	7.45219149604532e-11	4.33931419623985e-10	14.0936380336333
RAB32	0.705457782930527	3.59368037000034	6.70547661433171	7.58962664318069e-11	4.41439202516019e-10	14.0780619160429
CCDC22	0.341446427219452	2.76561825052983	6.70449676425278	7.58436861593011e-11	4.41380510825109e-10	14.0765301787278
DUSP9	1.53638270596157	1.02700788851659	6.69741599963093	7.91923747358932e-11	4.60352763713743e-10	14.034489098247
TIMM22	0.328347637373084	1.94349244950003	6.6969466871285	7.9419384611203e-11	4.61414187550994e-10	14.0317038455272
AKR7A3	-1.36733986408097	4.21328120669891	-6.73328716402201	8.59633940800908e-11	4.94730048589465e-10	14.0313280867527
CLN6	0.447132877793252	3.03014486229683	6.69639185895056	7.96885832621528e-11	4.62719397947034e-10	14.0284112753589
CALM3	0.519150969868114	5.14294484862289	6.69543031733775	8.01572395322324e-11	4.65180672771414e-10	14.0227056115192
GPHN	-0.487613108400706	1.8942810504769	-6.69526749127022	8.02368685762731e-11	4.65382797750042e-10	14.0217394860537
PCYT1A	0.287048293150719	2.25902677331886	6.69327695270736	8.12166292152081e-11	4.70802647481909e-10	14.0099301469229
MECP2	0.221630079817915	1.36027193447161	6.69316687398296	8.12711523329282e-11	4.70855956739798e-10	14.009277159048
CABIN1	0.334653680726986	2.08872493056521	6.69286991258869	8.14184196493269e-11	4.71446233733115e-10	14.0075156235534
ADM2	0.726835602830928	1.70695140540131	6.6903779688354	8.26645772121466e-11	4.78395335977593e-10	13.9927361525184
PSMD4	0.586770327211213	5.66368498954194	6.68965685801149	8.30286666364195e-11	4.8023484911978e-10	13.9884601186585
TPI1	0.506532609298279	6.36070946045828	6.68942706221938	8.31450211547354e-11	4.8064022245709e-10	13.9870975541984
FXR1	0.279250300015253	2.79567910692359	6.68903183457215	8.33455147773075e-11	4.8153126112718e-10	13.9847541541406
ITPR3	0.555593526446282	1.00270193581177	6.68687346039569	8.44488311019075e-11	4.87634495545645e-10	13.9719585433579
MMP11	0.7730571936264	1.44359872344538	6.68619986124119	8.47960876211008e-11	4.89367643448886e-10	13.9679658689442
LIMD2	0.61384971969776	1.55935578782043	6.68593623491283	8.49323746639525e-11	4.89882014441498e-10	13.9664033426403
DNAL4	0.364062244411648	2.02527678455877	6.68539997351664	8.52102699668216e-11	4.91194367249352e-10	13.9632250435042
NFATC2IP	0.301352371037792	2.18137285418626	6.68531483610588	8.52544709424895e-11	4.91194367249352e-10	13.9627204718073
NPAS2	0.357774702760937	1.26218915085562	6.68403359819926	8.59223786441401e-11	4.94730048589465e-10	13.9551277496488
PXMP2	-0.849135085857666	4.51196988981909	-6.68604309455527	8.65931546860925e-11	4.97527483893323e-10	13.9526686190842
ALDH9A1	-0.55285363061423	4.66534989308533	-6.68338284762498	8.626357852805e-11	4.96033244477046e-10	13.9512717837046
RAI1	0.3860052078869	1.10085815186217	6.68334143617904	8.62853362312305e-11	4.96033244477046e-10	13.9510264137226
ADK	-0.508376613144422	3.30056260714178	-6.68264323319539	8.66529864531563e-11	4.97596032766937e-10	13.946889619332
RPS24	0.72482678305821	6.22364060182002	6.68022684297408	8.79372865523275e-11	5.04692007019656e-10	13.9325753193458
TMUB2	0.379943805578627	2.95380725506465	6.67959781718905	8.82746646281617e-11	5.06348545641824e-10	13.9288497381112
ZMYM1	0.258031390085143	1.15360291201558	6.67940494744929	8.83783646457618e-11	5.06663604823495e-10	13.9277074681004
RIMS3	0.159704022342124	0.566423415209592	6.67863227947188	8.87950045792905e-11	5.08771377589448e-10	13.9231316049384
GOLT1B	0.355763167137622	2.94602241215182	6.67733352396766	8.9499671243372e-11	5.12526232015517e-10	13.9154411008803
THADA	0.208023615252038	1.64557253949113	6.67453402039735	9.10373221174307e-11	5.21044463997725e-10	13.8988679872956
SH3GL1	0.41218586169491	3.57393726713005	6.67396438877754	9.13533575107281e-11	5.22565351223262e-10	13.8954964235628
NRAS	0.484512524812708	3.102561999244	6.67315238274212	9.18057264721865e-11	5.24863999225687e-10	13.8906906716425
GPD1L	0.394805812987326	1.49991111382011	6.67270772678205	9.20543755595313e-11	5.25996068928719e-10	13.8880592272699
SLC39A6	0.520331002286477	2.69918297924921	6.66803059993588	9.47101777555311e-11	5.40873736407068e-10	13.8603886201521
LIMS2	-0.43115427441042	2.03734168990161	-6.6677811760138	9.48539006714571e-11	5.41396879217086e-10	13.8589134163524
TMCO3	0.579195042396466	1.77158003098852	6.66651283106096	9.55880645798066e-11	5.45287652309188e-10	13.8514125299874
PARL	0.305998425748148	3.78339059316023	6.66593979341626	9.59215860924227e-11	5.46889921146041e-10	13.8480239996851
TMEM43	0.462654530175799	2.98386976290268	6.66565899759326	9.6085432679791e-11	5.47523573602671e-10	13.8463636595126
ACOX1	-0.698260705327319	3.86241011282317	-6.66472179104246	9.66342913256715e-11	5.50349242484142e-10	13.8408223722611
TRIM37	0.298635473679338	2.06556456732822	6.66454296908905	9.67393643468228e-11	5.50645762649203e-10	13.8397651465954
SLC6A6	0.571481974403759	0.791528568675279	6.66436439131546	9.68444058073054e-11	5.50917592669449e-10	13.8387093867403
FNDC3B	0.388803784657697	2.65950675314964	6.66428152204971	9.68931884681443e-11	5.50917592669449e-10	13.8382194674309
PFDN2	0.539726284188698	5.65079159277579	6.6636651322078	9.72567964892215e-11	5.52659224004805e-10	13.8345755486543
SUPT3H	0.240247419138857	0.929160161905415	6.66358206002113	9.7305903032806e-11	5.52659224004805e-10	13.8340844700647
SSR4	0.579345868101327	4.64005240242089	6.65679418429165	1.01401755099005e-10	5.75607339873479e-10	13.7939743707399
JRK	0.191455916811792	1.11619097801717	6.65620041053197	1.01767988102646e-10	5.77370759372086e-10	13.7904672381979
NSD1	0.30218247437143	1.66875485283857	6.65249116500936	1.04085374634208e-10	5.90195890666024e-10	13.7685640824292
MRPL18	0.446168563032347	4.46025659438563	6.65065204340755	1.05253512606487e-10	5.96103047280765e-10	13.7577075893016
SCRN1	0.587766694552818	1.19917495661457	6.65051252594017	1.0534265189232e-10	5.96103047280765e-10	13.7568841017446
ARMCX6	0.358652989685958	1.60195086652164	6.65050397387516	1.05348118312802e-10	5.96103047280765e-10	13.7568336244978
ZNF550	0.304340118569536	0.831025024621965	6.65049057977864	1.05356680285665e-10	5.96103047280765e-10	13.7567545680078
SCAMP2	0.312001029768021	3.59224483749731	6.6498129361476	1.05790746232469e-10	5.98233136561182e-10	13.7527550489669
PELI1	0.528657505259833	1.93739426301547	6.64962037095177	1.05914414187614e-10	5.98606602057092e-10	13.7516185686521
TRO	-0.440033514472249	0.929613600075427	-6.64940110578369	1.06055401998687e-10	5.99077496445004e-10	13.7503245420024
FAM53C	0.268360924131862	2.03686840231086	6.64901000074809	1.06307340551595e-10	6.00174268288029e-10	13.7480164593948
PAQR5	0.716779969567881	0.89801870357525	6.64863049912804	1.06552366025939e-10	6.01230840998077e-10	13.7457769554299
PUS7L	0.174311576065303	1.01174856378967	6.64771208331846	1.07147638070844e-10	6.04261489837096e-10	13.7403576415924
DHRS12	-0.386043751951375	1.85509848203123	-6.64738950991675	1.07357487887839e-10	6.05116432001558e-10	13.7384543658654
SLC27A5	-1.53995574506328	4.55155338402775	-6.68575011360795	1.17543430666677e-10	6.56473740734107e-10	13.7355527750455
MTX1	0.318261788808688	2.54135763720656	6.64672993670162	1.07787829071034e-10	6.07212564202767e-10	13.7345629199561
RGS1	0.860669871960961	1.64017159180123	6.64620656060991	1.08130512270325e-10	6.08812878842353e-10	13.7314752451772
DDAH2	0.82395805934169	3.82475617688847	6.64581793105692	1.08735524618199e-10	6.11887665077924e-10	13.7274280114925
LSM14B	0.497658200290851	2.66277553537839	6.64354970226089	1.0988666379531e-10	6.18030678671184e-10	13.7158039624374
WDR33	0.236653473473534	1.81686715165773	6.64293888702164	1.10294346084656e-10	6.1998791511223e-10	13.7122018089359
GPRC5D	0.162043549767862	0.525246788609492	6.64228865719629	1.107299665202e-10	6.21806514789358e-10	13.708367501849
HSF1	0.560544528059531	3.48854263388354	6.64227730502826	1.10737586865644e-10	6.21806514789358e-10	13.7083005624444
EXOSC5	0.515241930333841	3.46820064078229	6.64189168894464	1.10996744461715e-10	6.22925003494487e-10	13.706026784811
ZNF14	0.315631057779213	0.819296471648659	6.64105825722063	1.11558896826893e-10	6.25741803584104e-10	13.7011128249903
RPLP1	0.642146314138951	7.46857563962477	6.63930223494334	1.12752501286018e-10	6.32095511796631e-10	13.6907608040241
ENTPD5	-0.839152046749805	3.4199752365025	-6.63824524456712	1.13476992805378e-10	6.35813916538441e-10	13.6845307194094
DCK	0.401866693411676	2.00073608392098	6.63672322501808	1.14528261173657e-10	6.41358262572476e-10	13.6755610400407
NF2	0.343636737197279	1.89749879111991	6.6349855424526	1.15740178121451e-10	6.47795781425447e-10	13.6653223734144
PFDN5	0.436813518257391	5.11148547026379	6.63338666963577	1.1686639760022e-10	6.53746978067357e-10	13.6559034526715
SUZ12	0.326983003339344	2.45604597223613	6.63317668725106	1.1701510240763e-10	6.54226525194004e-10	13.654666583986
SMU1	0.290808523463982	2.44165407209812	6.63258395308378	1.17435866090721e-10	6.56225807934596e-10	13.65117534115
RNF2	0.352216420511347	1.55076072568734	6.63192063235225	1.17908497759588e-10	6.58158772018593e-10	13.6472686293592
MAPK9	0.282572324959061	2.04664680285274	6.63052446458665	1.18909408279427e-10	6.63389330401015e-10	13.6390467244489
TAF15	0.368477664913142	3.75518857684174	6.62817157217893	1.20615092822287e-10	6.72544060245796e-10	13.6251938316655
LAPTM4B	1.12537192739479	4.23596290812694	6.63499905367001	1.25573359541449e-10	6.97943316702288e-10	13.6138837215825
CDC16	0.332766138949365	3.24894258654269	6.62615142452979	1.22098701112818e-10	6.80451345042891e-10	13.6133030890657
THOC2	0.280777885986989	2.11738060643081	6.62542768881281	1.22634562259751e-10	6.83071223996938e-10	13.6090438184831
VANGL1	0.281008008062042	1.04687138223785	6.62463593726109	1.23223426641387e-10	6.85983363317646e-10	13.6043846853302
TNFRSF11A	0.238661913569672	0.599893020116904	6.62435414747902	1.23433676327182e-10	6.86785768444973e-10	13.6027265736014
ZNF432	0.248182189244413	1.25544536688921	6.62316595765842	1.24324090048559e-10	6.91369725601945e-10	13.5957356185069
RIPK2	0.521215550053207	2.21247820253059	6.62089480959989	1.26043632343122e-10	7.00182488117837e-10	13.5823756018725
DCP2	0.221254746822575	1.92246253193589	6.61713206878899	1.2894399812739e-10	7.15911412371636e-10	13.5602492251475
MFAP1	0.295330989518769	3.01330888136333	6.61690826461878	1.29118557623143e-10	7.16497637066887e-10	13.5589334813021
MTMR8	0.102848759545081	0.351481068835534	6.61629230132899	1.29600185935866e-10	7.18677268660738e-10	13.5553124161786
RASAL1	0.27773548291246	0.61086136752761	6.61622908978988	1.29649711346768e-10	7.18677268660738e-10	13.5549408293207
CRHBP	-0.606371972039376	0.418513759566084	-6.61403135499705	1.31383203423623e-10	7.27897982487782e-10	13.5420232566347
PIAS4	0.342691073525716	2.361238353873	6.61352043420189	1.31789445810285e-10	7.29759468591282e-10	13.5390207132764
TSG101	0.287802113200295	3.57998354311133	6.61182651091803	1.33145152610675e-10	7.36873652274741e-10	13.5290672891083
PSPC1	0.368977003409321	2.31779791027991	6.61092728534177	1.33870385726896e-10	7.40492847141106e-10	13.5237842910905
ANKRD40	0.363878603885322	2.37242257363803	6.6080681198659	1.36202179870872e-10	7.52990018360093e-10	13.5069902977398
TUBG2	0.383594602319424	1.82823555417303	6.60797988932159	1.36274766656702e-10	7.52990572356289e-10	13.5064721454013
NFU1	0.308305612695916	2.98878270526831	6.60635071159686	1.37621924276292e-10	7.59888612362562e-10	13.4969054363958
HMGCL	-0.60460188787296	3.95975334060759	-6.60629350869261	1.37669461731454e-10	7.59888612362562e-10	13.4965695684399
CLN3	0.412212398025536	2.76795173875703	6.60254191860792	1.40822587123724e-10	7.76879997366565e-10	13.4745470316342
ATAD3A	0.446179787388636	2.56270001805818	6.6018705663096	1.41394270695419e-10	7.79619789800433e-10	13.4706071063604
CNNM4	0.310695879504522	1.47712498635826	6.60048839770513	1.42578422694278e-10	7.85731912439342e-10	13.4624966486325
PCID2	0.284367373300966	2.25432716566259	6.59816974899581	1.44586780082711e-10	7.9637723833468e-10	13.4488940007994
PBX2	0.538300845002296	2.97275717723247	6.59757122644032	1.45109697102883e-10	7.98833881030604e-10	13.4453833029984
HDAC4	0.206782188267941	1.04457260120758	6.59635495184239	1.46178054961905e-10	8.04289001559467e-10	13.4382498872918
STAM	0.326342160180967	2.08540932868852	6.59522800781293	1.47174832354656e-10	8.09344710693576e-10	13.4316413170817
EFHC1	0.227611129867097	1.08655890090732	6.59296527276394	1.49196392405208e-10	8.20027578997512e-10	13.4183749815844
ZMYM6	0.132630690157828	1.17873721980292	6.59053650136037	1.51396610778167e-10	8.31680588452456e-10	13.4041391705292
XYLT2	0.372586506767708	2.29790493304284	6.59023453104586	1.51672380355266e-10	8.32755120047837e-10	13.4023695140847
KIF24	0.209598218797526	0.433903518396303	6.58742006105738	1.54266468380657e-10	8.46550487870187e-10	13.3858787632382
SLC6A1	-1.18691161922311	3.66353658414035	-6.59665287849151	1.58057342421849e-10	8.65980840231103e-10	13.3843797791472
POLL	0.260369722346308	2.04775002989494	6.58549877909453	1.56062257244005e-10	8.55952866024669e-10	13.3746246333487
C8A	-1.21025804849161	5.35102770252159	-6.6067903682816	1.65003839036415e-10	9.02611837762126e-10	13.37149249318
PSMD9	0.182068099875361	1.63534577227562	6.58438629840416	1.57111433110283e-10	8.61252542031461e-10	13.3681093324752
RBM12B	0.22298147953242	1.16728551211666	6.58005415213053	1.61263410331235e-10	8.83080815245584e-10	13.3427461601926
PPP2R3B	0.227683988621207	0.917809977507696	6.57904522807339	1.6224572237131e-10	8.87991867225062e-10	13.3368411586119
PPOX	0.287245979981812	2.25515872625818	6.57560622872684	1.65638322785078e-10	9.05605735311258e-10	13.3167188467486
SEMA4D	0.258731366984384	0.753709948907454	6.57033737896598	1.70971508452462e-10	9.34272503842283e-10	13.2859057883749
CSK	0.324752661963833	3.2872995601241	6.56946539025512	1.71870244163884e-10	9.38689850880349e-10	13.280808140948
BTD	-0.564322451147158	3.33213766827564	-6.56893232393335	1.72421942493699e-10	9.41208165330817e-10	13.277692097257
ZNF532	0.296003739978007	1.2326868674787	6.56747623381738	1.73937796032334e-10	9.4858826138604e-10	13.2691815269141
NCF4	0.543983091428663	1.54339884825577	6.56745829762555	1.73956549666963e-10	9.4858826138604e-10	13.2690767025589
FZD7	0.428119239272674	0.833202582890979	6.56431832302609	1.7727038285636e-10	9.66151488516192e-10	13.2507292534997
COG4	0.350755520660464	2.97141161516611	6.56328792057207	1.78371273867457e-10	9.71641737249681e-10	13.244709931496
MGA	0.207802293764343	1.34833019352408	6.56268791780863	1.79015408900002e-10	9.74639448455566e-10	13.2412052273027
SNX17	0.320862564507203	4.32537839254514	6.56038480658182	1.81509180312514e-10	9.87698986425563e-10	13.2277547653472
ANXA11	0.433092301708787	3.53442587879217	6.55795700825653	1.84174855878851e-10	1.00167979207827e-09	13.2135801503234
LDB1	0.516259583831181	2.48425105637765	6.55633857665788	1.85973156443141e-10	1.01093100425502e-09	13.2041332957262
TMED9	0.45032192232502	6.02064777955528	6.55611432636027	1.86223684178652e-10	1.01176340546435e-09	13.2028244823655
DARS2	0.480274405352403	2.74459677863621	6.55366644757117	1.88980025616176e-10	1.02620204187184e-09	13.1885399936998
WDR1	0.418192525353929	3.89398933749384	6.55294668727793	1.89798070543109e-10	1.03010572455685e-09	13.1843406658207
SAR1A	0.275225465827371	3.32918097763608	6.55272070646252	1.90055625223909e-10	1.03096492680207e-09	13.1830222915504
NUDT21	0.370308197420165	2.40155711320822	6.55143505008488	1.91527449192173e-10	1.03840665042186e-09	13.1755224431532
HSP90AB1	0.654201680997088	7.60957822417908	6.5474149861844	1.96802038472369e-10	1.0664473529739e-09	13.1505056052368
GFER	0.396191066642759	2.64176084436383	6.54677902963969	1.96951837703535e-10	1.06670265383958e-09	13.1483713795676
DOK3	0.282383050902539	0.782644618401557	6.54627110919517	1.97552617146323e-10	1.06936048196727e-09	13.1454104208877
ZNF232	0.245469920571723	1.69600901785956	6.54619022664061	1.97648452577701e-10	1.06936048196727e-09	13.1449389269885
GSPT1	0.287865366688423	3.16190613847767	6.54272647447299	2.01795624999697e-10	1.09123006376723e-09	13.1247517733797
TNFAIP8	0.281543168299324	1.13084852150189	6.54037388998943	2.04660938976305e-10	1.10614871700617e-09	13.1110454515447
BCCIP	0.297037037231321	3.00350721091408	6.53968153456907	2.0551176232339e-10	1.11016962403295e-09	13.107012482618
PLEKHM2	0.419108622398013	2.95701587725439	6.53613420602862	2.09925730994627e-10	1.13342437295852e-09	13.0863545970507
PSMD3	0.367324596074845	4.19419795789518	6.53528982997237	2.10990018902726e-10	1.13857886564235e-09	13.0814386749011
SLC1A4	0.465637500433824	2.15975430639612	6.53450278802277	2.119868048759e-10	1.14336392993294e-09	13.0768570018341
BCLAF1	0.282528141730765	2.51355045774263	6.53193660812952	2.15269051217967e-10	1.1604644027256e-09	13.0619213160699
HADH	-0.627897974804633	4.37077653376063	-6.53076965728657	2.16778065376501e-10	1.16799302029621e-09	13.0551309613201
RNASEH2B	0.212393218131371	1.24422865451455	6.53015802747757	2.17573118530563e-10	1.17166902814696e-09	13.0515723401347
CTSO	-0.730147537569946	3.48687857196961	-6.52997187831301	2.1781565963533e-10	1.17236739496985e-09	13.0504893282579
TBC1D16	0.387476342986152	2.13029249615016	6.52827238902419	2.20042288843861e-10	1.18373863102539e-09	13.0406028653212
SFXN3	0.516687145648563	1.68506856103344	6.5257702418583	2.2336122475374e-10	1.20097122295127e-09	13.0260507956684
SEC13	0.335994947590339	3.89879644562689	6.52564354933845	2.23530573751593e-10	1.20126001041466e-09	13.0253140905821
STX10	0.450688973985869	3.88061821014205	6.52531482390726	2.2397056619547e-10	1.2030021931947e-09	13.0234026359099
DDX1	0.33257180490359	3.99769030853062	6.52300060593689	2.27092230250926e-10	1.2187545864207e-09	13.0099482047102
ASF1A	0.394097815720186	2.40204532463566	6.52296695463439	2.27137936013716e-10	1.2187545864207e-09	13.0097525901861
RPP25	0.552403710546581	1.41480303338175	6.52177352166486	2.28764723152734e-10	1.22684973882839e-09	13.0028156985321
ARID5B	0.302184419005562	1.78275969523091	6.52057800165288	2.3040581035929e-10	1.23501318782885e-09	12.9958676833441
ITGAV	0.619114484727207	2.7913891997406	6.51953839314977	2.31842259476126e-10	1.24207188831253e-09	12.9898266003782
ZNF552	0.252048440867821	1.49242519215412	6.51917461134305	2.3234697592458e-10	1.24413421953842e-09	12.9877128731426
REPS2	-0.238726146672886	1.31665086306515	-6.51752061678833	2.3465537387122e-10	1.25584751353644e-09	12.9781036380111
MUS81	0.241117525131679	2.21226955635987	6.51331228133851	2.40630633061812e-10	1.28716324214526e-09	12.9536631206744
MARK4	0.353868597915608	2.65711127946745	6.51248443777007	2.41823498557439e-10	1.29287828256031e-09	12.9488567711691
MRPL11	0.380464844522756	3.50387983861668	6.51074270557656	2.44352181198981e-10	1.30572554439044e-09	12.9387460864014
TMEM131	0.255809973218423	2.20514911212576	6.50994880852891	2.45513363259778e-10	1.31125594732266e-09	12.9341382571458
PHKG2	0.25970666795478	2.02959833212037	6.5097896380937	2.45746821972011e-10	1.31182835901606e-09	12.9332144753359
CHST11	0.5262787354153	1.13950072827432	6.50782219438839	2.48650552271664e-10	1.32664711710223e-09	12.9217974463739
GON4L	0.245808670805205	1.58289532311886	6.50608845938838	2.51237223809184e-10	1.33975989780791e-09	12.9117388903798
PLAUR	0.474029967693383	1.10568546989736	6.50444532316106	2.53713071251163e-10	1.35226853984458e-09	12.9022079190114
ABHD6	-0.577128102860648	2.65654788467594	-6.50397572288847	2.54425041648244e-10	1.35536786289331e-09	12.8994843647637
IL12A	0.116505632015498	0.317869081783795	6.5024203328728	2.56797219233317e-10	1.36730369728124e-09	12.8904646376101
UXT	0.391217695286244	4.69792027335612	6.50196575378119	2.57494599358305e-10	1.37031449699492e-09	12.887828850436
AP3B1	0.30984425095417	2.28041646319286	6.50081736647559	2.59264648920962e-10	1.37902773834662e-09	12.8811708039573
TMEM39B	0.261706889942687	1.95836582620667	6.50069280052757	2.59457362577304e-10	1.37934651097904e-09	12.8804486595271
SP110	0.160198302677483	1.15433528069316	6.4992180108083	2.61749685939498e-10	1.39082134912507e-09	12.87189971563
NCOR2	0.417756889144826	2.3681537003061	6.49908963236233	2.6195016662772e-10	1.39117501581225e-09	12.8711556144227
ZNF93	0.184721454570742	0.97835213028341	6.49866722622701	2.62610875554115e-10	1.3939712699316e-09	12.8687073657967
RPS9	0.569295127026003	6.32375899586232	6.49656012508993	2.65931194307249e-10	1.41048698169755e-09	12.8564965789268
RASSF3	0.603153837226701	2.54265270884447	6.49652061884947	2.65993838770264e-10	1.41048698169755e-09	12.8562676677101
RNF187	0.537852624746184	4.98945549605273	6.49570335744158	2.67293008861766e-10	1.41665294696736e-09	12.8515324533033
LRP8	0.184555829080583	0.443608273409553	6.49550251024413	2.67613239433866e-10	1.41762688997399e-09	12.8503688165259
DFFB	0.175493529531772	0.851625867196616	6.49403131584318	2.69970408077386e-10	1.42938460708863e-09	12.841846112899
XRCC4	0.28753789016778	1.31248061573983	6.49320084635903	2.71309975204647e-10	1.43574529924905e-09	12.8370358373762
EXOSC8	0.271307422074056	2.11145119957624	6.49172728023729	2.73702932942079e-10	1.44767111374864e-09	12.828501795425
KCNJ8	-1.13982735538664	2.84502942749195	-6.49056468312319	2.76421847153645e-10	1.46130796347688e-09	12.8197448919967
SLC30A5	0.300823577873915	2.49804363124253	6.48876875065063	2.78570010135414e-10	1.47191519088844e-09	12.8113723450621
GNL1	0.331412735577646	2.45017990634723	6.48619609324117	2.82871195711642e-10	1.4938820442565e-09	12.7964820747429
KLHDC4	0.229334945471987	1.47203662027207	6.48607363526941	2.83077546744562e-10	1.49421217255209e-09	12.7957734177387
COPS6	0.39473537552249	4.44319460816976	6.48555533724852	2.83952554034046e-10	1.4980696451527e-09	12.7927741754888
FER1L4	0.246036244066689	0.746656312078787	6.48257662642484	2.89032964202508e-10	1.52409869651556e-09	12.7755409175963
UBE2E3	0.358709200121124	3.26764774088855	6.47710241874011	2.98603057214029e-10	1.57376385506816e-09	12.7438864158725
S100A4	1.15306855830989	3.09606145124655	6.47640282660136	3.02512955967983e-10	1.59356216358793e-09	12.7343500150635
CCNJL	0.246644059871586	0.529649460289283	6.47476745667663	3.02778965581907e-10	1.59415504027615e-09	12.7303910037979
FRAS1	0.379155192544908	0.670264874127013	6.47411291782218	3.03959799331813e-10	1.59956149719295e-09	12.726608650269
DOT1L	0.383655873235277	1.39375213360571	6.47361239959284	3.04865814422691e-10	1.60351700264451e-09	12.7237165335871
SMARCB1	0.472076972484221	3.80215992580425	6.47131272140958	3.09062730399411e-10	1.62476905029812e-09	12.7104307140753
XCL1	0.338831706599872	0.550722819480438	6.47056199980583	3.10445022899055e-10	1.63121036817167e-09	12.7060944185105
WDR46	0.427094989656663	3.52433848929883	6.46837663488229	3.14503497650239e-10	1.65169986531379e-09	12.6934736550021
PYGB	0.681197415514587	3.44880389999383	6.46762551757811	3.15910384769296e-10	1.6582501652266e-09	12.6891366383287
TMEM87A	0.325274323441815	2.36885950593779	6.46425390213355	3.22302002921062e-10	1.69094606381009e-09	12.6696735690138
PRMT3	0.251813025398844	1.62992376760148	6.46322436991042	3.24278845331645e-10	1.70045868011364e-09	12.6637320741367
PIK3R1	-0.545875173394049	2.68118623330734	-6.46094809733911	3.28691889137563e-10	1.72273024437992e-09	12.6505982335389
CHRNA4	-0.602567458706685	0.679660550158636	-6.45464192490881	3.41227543448635e-10	1.78752986452064e-09	12.6142315333017
PIAS3	0.381492381614529	1.57513441778966	6.45449412710606	3.41526892597637e-10	1.78819625015335e-09	12.6133795454987
RANBP3	0.28424301553731	2.33595945780539	6.45344046713593	3.43668444071063e-10	1.79850266851899e-09	12.6073061197852
SEMA4A	0.237860216650117	0.881899925983929	6.45121031528419	3.48244711250029e-10	1.82153376659884e-09	12.5944538520439
ACBD3	0.438073814455122	3.32168030674384	6.45049999186028	3.49714797200975e-10	1.82830262371602e-09	12.5903610313625
CASC3	0.347661394949342	3.03167753487219	6.44993297480034	3.50892660881469e-10	1.8335377068595e-09	12.5870941866573
RPL22	0.413348582968379	4.53501864978903	6.44684741040806	3.57370782200759e-10	1.86644931397762e-09	12.5693208443413
ACTB	0.474250552945129	8.89012191085204	6.44657044800843	3.57957964119024e-10	1.86857654837609e-09	12.5677258278697
RPL37A	0.721283532335705	5.50832048220825	6.44577264440586	3.59654660793375e-10	1.87649051548045e-09	12.5631316105469
RABGGTB	0.340448679174635	2.96508074809863	6.44542978592601	3.60386240858744e-10	1.87936358937783e-09	12.561157370989
EHD1	0.346336566716469	2.41882298581192	6.44501829617252	3.61266190170688e-10	1.88300711665484e-09	12.5587880508324
NCF2	0.659697181581534	1.65624453557453	6.44493031247688	3.61454611823836e-10	1.88304438697392e-09	12.5582814644309
RRP9	0.459905065983084	3.17873733583842	6.4415762717455	3.68709741394439e-10	1.9198780920328e-09	12.5389739076785
HSPBAP1	0.177988750356887	1.43181563442051	6.44058590589353	3.70879166967019e-10	1.93020680684037e-09	12.5332743907119
ARHGAP19	0.22166480340776	1.15437702287201	6.43980572875693	3.72596973955723e-10	1.938175946646e-09	12.5287849930334
PDK3	0.316514149795633	1.09858064071259	6.43860120198478	3.75264447348255e-10	1.95107461414098e-09	12.5218545975284
PLEKHA2	0.376487747087889	1.33988146200917	6.43638019853332	3.80232115463686e-10	1.97591356450063e-09	12.5090784834794
[truncated: 8,389 more rows]
