# Supplementary material for: A Nucleotide Metabolism-Related Gene Signature for Risk Stratification and Prognosis Prediction in Hepatocellular Carcinoma Based on an Integrated Transcriptomics and Metabolomics Approach
Source: Metabolites. 2023 Oct 30;13(11):1116. doi: 10.3390/metabo13111116 (PMC10673507; doi:10.3390/metabo13111116)
Supplement: Supplementary file 1 [file metabolites-13-01116-s001.zip › Supplementary Table 5 Baseline data of clinical samples..xls]

## Sheet: Sheet1
	tumor(n=26)	normal(n=26)	p-value
Age (years)	59.27±9.63	58.62±6.89	0.77433
Gender, male (%)	0.769	0.692
WBC (*10^9/L)	5.03±1.89	6.03±1.59	0.554099
HB (g/L)	139.86±19.46	147.41±14.16	0.547641
PLT(*10^9/L)	158.19±76.30	245.82±46.29	0.0150285
Cre (μmol/L)	5.64±1.22	5.29±0.71	0.115367
Glu (mmol/L)	46.33±33.99	26.96±13.76	0.0187954
ALT (U/L)	39.57±20.49	21.87±6.61	0.000814152
AST (U/L)	65.14±11.26	65.78±11.24	0.386091
TBIL(μmol/L)	18.69±17.48	14.22±4.12	0.183092
DBIL(μmol/L)	8.35±13.73	4.09±1.45	0.14689
TBA (μmol/L)	13.39±12.28	3.68±1.82	0.00207827
